# Supplementary material for: Lipidomic and Transcriptomic Analysis of the Longissimus Muscle of Luchuan and Duroc Pigs
Source: Front Nutr. 2021 May 7;8:667622. doi: 10.3389/fnut.2021.667622 (PMC8154583; doi:10.3389/fnut.2021.667622)
Supplement: Supplementary file 1 [file Table_1.XLS]

name	DM1	DM2	DM3	LM1	LM2	LM3	GeneName	Biotype	Position	NR:Seq-id	NR:Score	NR:Evalue	NR:Description	NT:Seq-id	NT:Score	NT:Evalue	NT:Description	Uniprot:UniProtKB-AC	Uniprot:Score	Uniprot:Evalue	Uniprot:Description	COG:gene	COG:Score	COG:Eval	COG:num	Pfam:pfam_ID	Pfam:pfam_Name	Pfam:pfam_Description	GO:biological_process	GO:cellular_component	GO:molecular_function	KEGG:KO	KEGG:Description
ENSSSCG00000033777	0.0	0.022975372905135724	0.0	0.0	0.0	0.0	GPR152	protein_coding	chr2:5069868-5080404:+	gi|594099274|ref|XP_006072773.1|	1200	1e-144	PREDICTED: probable G-protein coupled receptor 152 [Bubalus bubalis]	gi|927100912|ref|XM_003353743.3|	956	0.0	PREDICTED: Sus scrofa G protein-coupled receptor 152 (GPR152), mRNA	Q8TDT2	419	3e-129	Probable G-protein coupled receptor 152	.	.	.	.	pfam00001	7tm_1	7 transmembrane receptor (rhodopsin family). This family contains, amongst other G-protein-coupled receptors (GCPRs), members of the opsin family, which have been considered to be typical members of the rhodopsin superfamily. They share several motifs, mainly the seven transmembrane helices, GCPRs of the rhodopsin superfamily. All opsins bind a chromophore, such as 11-cis-retinal. The function of…	GO:0038166|angiotensin-activated signaling pathway;	GO:0005887|integral component of plasma membrane;	GO:0001595|angiotensin receptor activity;	K08436	GPR152; G protein-coupled receptor 152
ENSSSCG00000033776	0.0	0.017231529678851793	0.0	0.0	0.0	0.0	ENSSSCG00000033776	protein_coding	chrX:101806655-101810304:+	gi|927219840|ref|XP_013841859.1|	2987	0.0	PREDICTED: LOW QUALITY PROTEIN: basic salivary proline-rich protein 2 [Sus scrofa]	gi|255914686|emb|FP085529.3|	3646	0.0	Pig DNA sequence from clone CH242-373I23 on chromosome X, complete sequence	A0A0J9YWL9	97.4	4e-19	Testis-expressed sequence 13C protein	.	.	.	.	pfam15186	TEX13	Testis-expressed sequence 13 protein family. The function of this family of proteins has not, as yet, been determined. However, members are thought to be encoded for by spermatogonially-expressed, germ-cell-specific genes. This family of proteins is found in eukaryotes. Proteins in this family are typically between 177 and 384 amino acids in length. There are two conserved sequence motifs: FIN an…	.	.	GO:0008270|zinc ion binding;	.	.
ENSSSCG00000033770	0.28479058072255714	0.5852649827778841	0.45174038120109944	0.18845304044946642	0.1257470941054982	0.12139743544207723	CXorf67	protein_coding	chrX:44859159-44862264:+	gi|927218623|ref|XP_013841593.1|	581	4e-60	PREDICTED: uncharacterized protein CXorf67 homolog [Sus scrofa]	gi|306965471|emb|FP102067.5|	459	0.0	Pig DNA sequence from clone CH242-300C18 on chromosome X, complete sequence	.	.	.	.	.	.	.	.	pfam15449	Retinal	Retinal protein. This family of proteins is found in the photoreceptor cells of the retina. Mutations of the gene encoding this protein have been associated with retinal disorders such as retinitis pigmentosa and late-onset progressive retinal atrophy. The function of this family of proteins is unknown, but it is likely to be important in the development and function of the retina.	.	.	.	.	.
ENSSSCG00000022538	2.6280229758709694	2.7668994590182696	2.8436622542583945	3.254681680814484	2.9823186261622388	3.0800301767536755	MARK4	protein_coding	chr6:51665918-51700552:+	gi|926714841|ref|XP_013826905.1|	3335	0.0	PREDICTED: MAP/microtubule affinity-regulating kinase 4 [Capra hircus]	gi|466015920|ref|XM_004271171.1|	2819	0.0	PREDICTED: Orcinus orca MAP/microtubule affinity-regulating kinase 4 (MARK4), transcript variant X1, mRNA	Q96L34	80.9	2e-14	MAP/microtubule affinity-regulating kinase 4	.	.	.	.	pfam00069	Pkinase	Protein kinase domain.	GO:0051301|cell division;GO:0030030|cell projection organization;GO:0030010|establishment of cell polarity;GO:0001578|microtubule bundle formation;GO:0000226|microtubule cytoskeleton organization;GO:0007067|mitotic nuclear division;GO:0007399|nervous system development;GO:0043068|positive regulation of programmed cell death;GO:0006468|protein phosphorylation;	GO:0005813|centrosome;GO:0036064|ciliary basal body;GO:0005829|cytosol;GO:0015630|microtubule cytoskeleton;GO:0005815|microtubule organizing center;GO:0043005|neuron projection;	GO:0005524|ATP binding;GO:0043015|gamma-tubulin binding;GO:0008017|microtubule binding;GO:0004674|protein serine/threonine kinase activity;GO:0050321|tau-protein kinase activity;GO:0043130|ubiquitin binding;	K08798	MARK; MAP/microtubule affinity-regulating kinase [EC:2.7.11.1]
ENSSSCG00000025969	0.44842221737005467	0.677441373712229	0.23452153330471157	0.4420073119215483	0.7149905634229856	0.6212327946347116	PTPRR	protein_coding	chr5:34796100-34914646:-	gi|927130672|ref|XP_013853177.1|	2650	0.0	PREDICTED: receptor-type tyrosine-protein phosphatase R [Sus scrofa]	gi|927130671|ref|XM_013997723.1|	875	0.0	PREDICTED: Sus scrofa protein tyrosine phosphatase, receptor type, R (PTPRR), mRNA	Q15256	974	0.0	Receptor-type tyrosine-protein phosphatase R	SPAC11E3.09	120	2e-29	COG5599	pfam00102	Y_phosphatase	Protein-tyrosine phosphatase.	GO:0038128|ERBB2 signaling pathway;GO:0001701|in utero embryonic development;GO:0010633|negative regulation of epithelial cell migration;GO:0070373|negative regulation of ERK1 and ERK2 cascade;GO:0006470|protein dephosphorylation;	GO:0030054|cell junction;GO:0005737|cytoplasm;GO:0005615|extracellular space;GO:0016021|integral component of membrane;GO:0048471|perinuclear region of cytoplasm;GO:0005886|plasma membrane;	GO:0019901|protein kinase binding;GO:0004725|protein tyrosine phosphatase activity;GO:0005001|transmembrane receptor protein tyrosine phosphatase activity;	K04458	PTPRR; receptor-type tyrosine-protein phosphatase R [EC:3.1.3.48]
ENSSSCG00000025741	0.7731484712170925	0.519116673861152	0.33375001872555826	0.18474865292542716	0.3013396371125025	0.23802229577229173	SNX20	protein_coding	chr6:34179371-34188225:+	gi|927226313|ref|XP_013847801.1|	1579	0.0	PREDICTED: sorting nexin-20 [Sus scrofa]	gi|927226312|ref|XM_013992347.1|	2169	0.0	PREDICTED: Sus scrofa sorting nexin 20 (SNX20), mRNA	Q2T9W1	543	0.0	Sorting nexin-20	.	.	.	.	pfam00787	PX	PX domain. PX domains bind to phosphoinositides.	GO:0015031|protein transport;	GO:0031901|early endosome membrane;GO:0005634|nucleus;GO:0005886|plasma membrane;	GO:0032266|phosphatidylinositol-3-phosphate binding;GO:0005546|phosphatidylinositol-4,5-bisphosphate binding;	K17931	SNX20; sorting nexin-20
ENSSSCG00000025967	3.6621147751887797	5.400082911983605	1.790891708872343	7.159787862530864	3.1849579643387544	6.149577159010276	SMKR1	protein_coding	chr18:19190441-19190638:-	gi|350595265|ref|XP_003484072.1|	258	7e-26	PREDICTED: small lysine-rich protein 1 [Sus scrofa]	gi|545882710|ref|XM_003484024.2|	196	5e-97	PREDICTED: Sus scrofa small lysine-rich protein 1 (SMKR1), mRNA	H3BMG3	79.0	2e-19	Small lysine-rich protein 1	.	.	.	.	pfam10785	NADH-u_ox-rdase	NADH-ubiquinone oxidoreductase complex I, 21 kDa subunit. This family is the N-terminal domain of NADH-ubiquinone oxidoreductase 21 kDa subunits from fungi, lower metazoa and plants.	.	GO:0048471|perinuclear region of cytoplasm;	GO:0000166|nucleotide binding;GO:0003743|translation initiation factor activity;	.	.
ENSSSCG00000025966	115.67998245801803	133.9867861785314	115.52942293739986	83.425975412202	126.12433538781467	97.12529692111634	EIF4H	protein_coding	chr3:11321542-11348666:+	gi|343478220|ref|NP_001230376.1|	873	9e-107	eukaryotic translation initiation factor 4H isoform 1 [Sus scrofa]	gi|343478219|ref|NM_001243447.1|	2508	0.0	Sus scrofa eukaryotic translation initiation factor 4H (EIF4H), transcript variant 1, mRNA	Q15056	337	7e-107	Eukaryotic translation initiation factor 4H	.	.	.	.	pfam00076	RRM_1	RNA recognition motif. (a.k.a. RRM, RBD, or RNP domain). The RRM motif is probably diagnostic of an RNA binding protein. RRMs are found in a variety of RNA binding proteins, including various hnRNP proteins, proteins implicated in regulation of alternative splicing, and protein components of snRNPs. The motif also appears in a few single stranded DNA binding proteins. The RRM structure consists o…	GO:0002181|cytoplasmic translation;GO:0048589|developmental growth;GO:0097010|eukaryotic translation initiation factor 4F complex assembly;GO:0001731|formation of translation preinitiation complex;GO:0006446|regulation of translational initiation;GO:0019953|sexual reproduction;GO:0006413|translational initiation;GO:0016032|viral process;	GO:0005913|cell-cell adherens junction;GO:0005829|cytosol;GO:0016281|eukaryotic translation initiation factor 4F complex;GO:0016020|membrane;GO:0048471|perinuclear region of cytoplasm;GO:0005844|polysome;	GO:0098641|cadherin binding involved in cell-cell adhesion;GO:0004386|helicase activity;GO:0000166|nucleotide binding;GO:0044822|poly(A) RNA binding;GO:0043024|ribosomal small subunit binding;GO:0003723|RNA binding;GO:0033592|RNA strand annealing activity;GO:0034057|RNA strand-exchange activity;GO:0008135|translation factor activity, RNA binding;GO:0003743|translation initiation factor activity;	.	.
ENSSSCG00000022536	0.9743159736266732	0.9601139446697285	0.4296057164486599	0.4293790879516329	0.5348136344285817	0.3097884883349252	SLC37A2	protein_coding	chr9:52237273-52272692:+	gi|545849119|ref|XP_005667528.1|	2471	0.0	PREDICTED: sugar phosphate exchanger 2 isoform X1 [Sus scrofa]	gi|927177952|ref|XM_005667471.2|	4120	0.0	PREDICTED: Sus scrofa solute carrier family 37 (glucose-6-phosphate transporter), member 2 (SLC37A2), transcript variant X1, mRNA	Q58CV5	831	0.0	Glucose-6-phosphate exchanger SLC37A2	PA5235	102	5e-22	COG2271	pfam07690	MFS_1	Major Facilitator Superfamily.	GO:0006820|anion transport;GO:0008643|carbohydrate transport;GO:0015760|glucose-6-phosphate transport;GO:0035435|phosphate ion transmembrane transport;GO:0055085|transmembrane transport;	GO:0070062|extracellular exosome;GO:0030176|integral component of endoplasmic reticulum membrane;GO:0016021|integral component of membrane;	GO:0061513|glucose 6-phosphate:inorganic phosphate antiporter activity;GO:0022857|transmembrane transporter activity;	K13783	SLC37A1_2; MFS transporter, OPA family, solute carrier family 37 (glycerol-3-phosphate transporter), member 1/2
ENSSSCG00000022534	4.78588802902222	5.1420717476415305	4.268901052985504	3.822450009873621	4.913935144979792	3.795167618132056	ZNF644	protein_coding	chr4:125740329-125857196:+	gi|927125529|ref|XP_013852845.1|	6974	0.0	PREDICTED: zinc finger protein 644 isoform X1 [Sus scrofa]	gi|927125540|ref|XM_013997395.1|	6423	0.0	PREDICTED: Sus scrofa zinc finger protein 644 (LOC100152774), transcript variant X4, mRNA	Q9H582	2309	0.0	Zinc finger protein 644	.	.	.	.	pfam00096	zf-C2H2	Zinc finger, C2H2 type. The C2H2 zinc finger is the classical zinc finger domain. The two conserved cysteines and histidines co-ordinate a zinc ion. The following pattern describes the zinc finger. #-X-C-X(1-5)-C-X3-#-X5-#-X2-H-X(3-6)-[H/C] Where X can be any amino acid, and numbers in brackets indicate the number of residues. The positions marked # are those that are important for the stable fol…	GO:0006355|regulation of transcription, DNA-templated;GO:0006351|transcription, DNA-templated;	GO:0005634|nucleus;	GO:0003677|DNA binding;GO:0046872|metal ion binding;	.	.
ENSSSCG00000015694	0.18332398159467075	0.5122563401748452	0.3639416404800172	0.2816126334487706	0.22549046851218357	0.181408861365321	ZRANB3	protein_coding	chr15:16414254-16727660:+	gi|465983696|ref|XP_004265489.1|	5173	0.0	PREDICTED: DNA annealing helicase and endonuclease ZRANB3 isoform X1 [Orcinus orca]	gi|927209141|ref|XM_005671617.2|	3517	0.0	PREDICTED: Sus scrofa zinc finger, RAN-binding domain containing 3 (ZRANB3), mRNA	E1BB03	1833	0.0	DNA annealing helicase and endonuclease ZRANB3	ECU06g0820	313	3e-92	COG0553	pfam00176	SNF2_N	SNF2 family N-terminal domain. This domain is found in proteins involved in a variety of processes including transcription regulation (e.g., SNF2, STH1, brahma, MOT1), DNA repair (e.g., ERCC6, RAD16, RAD5), DNA recombination (e.g., RAD54), and chromatin unwinding (e.g., ISWI) as well as a variety of other proteins with little functional information (e.g., lodestar, ETL1).	GO:0006974|cellular response to DNA damage stimulus;GO:0006281|DNA repair;GO:0036292|DNA rewinding;GO:0045910|negative regulation of DNA recombination;GO:0031297|replication fork processing;GO:0048478|replication fork protection;GO:0009411|response to UV;	GO:0043596|nuclear replication fork;	GO:0036310|annealing helicase activity;GO:0005524|ATP binding;GO:0004520|endodeoxyribonuclease activity;GO:0004386|helicase activity;GO:0070530|K63-linked polyubiquitin binding;GO:0008270|zinc ion binding;	.	.
ENSSSCG00000015695	12.916738429734675	14.28507763032424	14.069013246542083	12.971100699292759	13.327308314258959	13.236031194512684	RAB3GAP1	protein_coding	chr15:16764048-16814764:-	gi|927209144|ref|XP_013839399.1|	3489	0.0	PREDICTED: rab3 GTPase-activating protein catalytic subunit isoform X1 [Sus scrofa]	gi|927209145|ref|XM_013983947.1|	2289	0.0	PREDICTED: Sus scrofa RAB3 GTPase activating protein subunit 1 (catalytic) (RAB3GAP1), transcript variant X2, mRNA	Q15042	1268	0.0	Rab3 GTPase-activating protein catalytic subunit	.	.	.	.	pfam13890	Rab3-GTPase_cat	Rab3 GTPase-activating protein catalytic subunit. This family is the probable catalytic subunit of the GTPase activating protein that has specificity for Rab3 subfamily (RAB3A, RAB3B, RAB3C and RAB3D). It is likely to convert active Rab3-GTP to the inactive form Rab3-GDP. Rab3 proteins are involved in regulated exocytosis of neurotransmitters and hormones. The Rab3 GTPase-activating complex is a …	GO:0007420|brain development;GO:0043010|camera-type eye development;GO:0097051|establishment of protein localization to endoplasmic reticulum membrane;GO:0060079|excitatory postsynaptic potential;GO:0060325|face morphogenesis;GO:0021854|hypothalamus development;GO:0034389|lipid particle organization;GO:2000786|positive regulation of autophagosome assembly;GO:1903373|positive regulation of endopla…	GO:0005789|endoplasmic reticulum membrane;GO:0071782|endoplasmic reticulum tubular network;GO:0070062|extracellular exosome;GO:0005794|Golgi apparatus;GO:0005811|lipid particle;GO:0098794|postsynapse;GO:0043234|protein complex;	GO:0005096|GTPase activator activity;GO:0005085|guanyl-nucleotide exchange factor activity;GO:0017137|Rab GTPase binding;	K18270	RAB3GAP1; Rab3 GTPase-activating protein catalytic subunit
ENSSSCG00000015697	14.305320721173619	13.344460329109728	10.947874356014452	11.183843108693203	13.176155662485755	10.097625564487956	ENSSSCG00000015697	protein_coding	chr15:16979672-17021248:-	gi|545873261|ref|XP_005671672.1|	2717	0.0	PREDICTED: cyclin-T2 isoform X2 [Sus scrofa]	gi|927209153|ref|XM_005671615.2|	1840	0.0	PREDICTED: Sus scrofa cyclin T2 (CCNT2), transcript variant X2, mRNA	O60583	962	0.0	Cyclin-T2	SPBC32F12.06	83.2	2e-16	COG5333	pfam00134	Cyclin_N	Cyclin, N-terminal domain. Cyclins regulate cyclin dependent kinases (CDKs). Human cyclin-O is a Uracil-DNA glycosylase that is related to other cyclins. Cyclins contain two domains of similar all-alpha fold, of which this family corresponds with the N-terminal domain.	GO:0007049|cell cycle;GO:0051301|cell division;GO:0019085|early viral transcription;GO:0019086|late viral transcription;GO:0045737|positive regulation of cyclin-dependent protein serine/threonine kinase activity;GO:1901409|positive regulation of phosphorylation of RNA polymerase II C-terminal domain;GO:0045944|positive regulation of transcription from RNA polymerase II promoter;GO:0000079|regulat…	GO:0008024|positive transcription elongation factor complex b;GO:0005654|nucleoplasm;GO:0005634|nucleus;GO:0048471|perinuclear region of cytoplasm;	GO:0097322|7SK snRNA binding;GO:0003682|chromatin binding;GO:0016538|cyclin-dependent protein serine/threonine kinase regulator activity;GO:0019901|protein kinase binding;GO:0004674|protein serine/threonine kinase activity;GO:0070063|RNA polymerase binding;GO:0001223|transcription coactivator binding;	K15188	CCNT; cyclin T
ENSSSCG00000015690	46.23329969619469	53.79238953904297	53.255278792714705	48.50791442816834	72.3955337049244	59.88407494371382	UBXN4	protein_coding	chr15:16162655-16206207:-	gi|927209137|ref|XP_005654217.2|	1928	0.0	PREDICTED: UBX domain-containing protein 4 [Sus scrofa]	gi|927209136|ref|XM_005654160.2|	1527	0.0	PREDICTED: Sus scrofa UBX domain protein 4 (UBXN4), mRNA	Q3ZBU9	696	0.0	UBX domain-containing protein 4	.	.	.	.	pfam00789	UBX	UBX domain. This domain is present in ubiquitin-regulatory proteins and is a general Cdc48-interacting module.	GO:0030433|ER-associated ubiquitin-dependent protein catabolic process;GO:0006986|response to unfolded protein;	GO:0005789|endoplasmic reticulum membrane;GO:0005635|nuclear envelope;	.	.	.
ENSSSCG00000015691	0.05465842948042955	0.026075905193950682	0.036753374622380174	0.014693594493999908	0.026145177319198732	0.012620400886028551	ENSSSCG00000015691	protein_coding	chr15:16040039-16065329:+	gi|350593231|ref|XP_003359478.2|	8404	0.0	PREDICTED: lactase-phlorizin hydrolase [Sus scrofa]	gi|927209133|ref|XM_003359430.4|	4641	0.0	PREDICTED: Sus scrofa lactase (LCT), mRNA	P09848	68.6	5e-10	Lactase-phlorizin hydrolase	BH1923	309	9e-92	COG2723	pfam00232	Glyco_hydro_1	Glycosyl hydrolase family 1.	GO:0005975|carbohydrate metabolic process;GO:1901657|glycosyl compound metabolic process;GO:0044245|polysaccharide digestion;	GO:0016324|apical plasma membrane;GO:0005887|integral component of plasma membrane;GO:0016020|membrane;GO:0005886|plasma membrane;	GO:0008422|beta-glucosidase activity;GO:0017042|glycosylceramidase activity;GO:0000016|lactase activity;	K01229	LCT; lactase-phlorizin hydrolase [EC:3.2.1.108 3.2.1.62]
ENSSSCG00000015692	11.712093722927214	11.521214011263426	9.389943031655845	8.234571507498481	8.032405945826087	7.754560764918254	R3HDM1	protein_coding	chr15:16230922-16414505:-	gi|861414216|ref|XP_012932363.1|	5048	0.0	PREDICTED: R3H domain-containing protein 1 isoform X1 [Heterocephalus glaber]	gi|928161942|ref|XM_005631950.2|	3927	0.0	PREDICTED: Canis lupus familiaris R3H domain containing 1 (R3HDM1), transcript variant X2, mRNA	Q15032	557	2e-174	R3H domain-containing protein 1	.	.	.	.	pfam01424	R3H	R3H domain. The name of the R3H domain comes from the characteristic spacing of the most conserved arginine and histidine residues. The function of the domain is predicted to be binding ssDNA.	.	.	GO:0044822|poly(A) RNA binding;	.	.
ENSSSCG00000015699	0.1343210717338727	0.28836258275612914	0.24085349523295901	0.1083268973597385	0.3212540381757888	0.2791275215831969	ENSSSCG00000015699	protein_coding	chr15:17106724-17164740:-	gi|927209163|ref|XP_013839406.1|	1567	0.0	PREDICTED: 2-amino-3-carboxymuconate-6-semialdehyde decarboxylase [Sus scrofa]	gi|927209162|ref|XM_013983952.1|	977	0.0	PREDICTED: Sus scrofa aminocarboxymuconate semialdehyde decarboxylase (ACMSD), mRNA	Q0II68	575	0.0	2-amino-3-carboxymuconate-6-semialdehyde decarboxylase	slr0619	112	5e-26	COG2159	pfam04909	Amidohydro_2	Amidohydrolase. These proteins are amidohydrolases that are related to pfam01979.	GO:0051259|protein oligomerization;GO:0046874|quinolinate metabolic process;GO:0006568|tryptophan metabolic process;	GO:0005829|cytosol;GO:0070062|extracellular exosome;	GO:0001760|aminocarboxymuconate-semialdehyde decarboxylase activity;GO:0016787|hydrolase activity;GO:0008270|zinc ion binding;	K03392	ACMSD; aminocarboxymuconate-semialdehyde decarboxylase [EC:4.1.1.45]
ENSSSCG00000009738	0.0	0.0	0.01865512196742024	0.0	0.0	0.0	GALNT9	protein_coding	chr14:23118122-23228528:+	gi|528988247|ref|XP_005217702.1|	3123	0.0	PREDICTED: polypeptide N-acetylgalactosaminyltransferase 9 isoform X1 [Bos taurus]	gi|594042130|ref|XM_006045542.1|	1704	0.0	PREDICTED: Bubalus bubalis UDP-N-acetyl-alpha-D-galactosamine:polypeptide N-acetylgalactosaminyltransferase 9 (GalNAc-T9) (GALNT9), transcript variant X1, mRNA	Q9GM01	991	0.0	Polypeptide N-acetylgalactosaminyltransferase 9	AF0321	50.8	6e-06	COG1216	pfam00652	Ricin_B_lectin	Ricin-type beta-trefoil lectin domain.	GO:0006486|protein glycosylation;	GO:0000139|Golgi membrane;GO:0016021|integral component of membrane;	GO:0030246|carbohydrate binding;GO:0046872|metal ion binding;GO:0004653|polypeptide N-acetylgalactosaminyltransferase activity;	K00710	GALNT; polypeptide N-acetylgalactosaminyltransferase [EC:2.4.1.41]
ENSSSCG00000009739	1.8367901909368896	1.821476270451577	1.4895127816591667	1.3759166531062756	1.1648928910270921	1.2580255841256465	NOC4L	protein_coding	chr14:23254119-23262698:-	gi|194043584|ref|XP_001928651.1|	2377	0.0	PREDICTED: nucleolar complex protein 4 homolog [Sus scrofa]	gi|927204380|ref|XM_001928616.6|	2036	0.0	PREDICTED: Sus scrofa nucleolar complex associated 4 homolog (NOC4L), mRNA	Q9BVI4	57.4	1e-06	Nucleolar complex protein 4 homolog	.	.	.	.	pfam03914	CBF	CBF/Mak21 family.	GO:0000462|maturation of SSU-rRNA from tricistronic rRNA transcript (SSU-rRNA, 5.8S rRNA, LSU-rRNA);GO:0006364|rRNA processing;	GO:0016021|integral component of membrane;GO:0030692|Noc4p-Nop14p complex;GO:0031965|nuclear membrane;GO:0005730|nucleolus;GO:0005654|nucleoplasm;GO:0005634|nucleus;GO:0032040|small-subunit processome;	GO:0044822|poly(A) RNA binding;	K14771	NOC4, UTP19; U3 small nucleolar RNA-associated protein 19
ENSSSCG00000012569	5.456215041198696	5.154704077019213	4.843622713537309	2.8323858039663383	3.7027327820275864	2.829933855926197	ATG4A	protein_coding	chrX:88543972-88635465:+	gi|955538488|ref|XP_004440526.2|	2149	0.0	PREDICTED: cysteine protease ATG4A isoform X1 [Ceratotherium simum simum]	gi|299884008|emb|CU856296.3|	2689	0.0	Pig DNA sequence from clone CH242-222M23 on chromosome X, complete sequence	Q6PZ05	717	0.0	Cysteine protease ATG4A	.	.	.	.	pfam03416	Peptidase_C54	Peptidase family C54.	GO:0000045|autophagosome assembly;GO:0006914|autophagy;GO:0006501|C-terminal protein lipidation;GO:0000422|mitophagy;GO:0044804|nucleophagy;GO:0051697|protein delipidation;GO:0016485|protein processing;GO:0006612|protein targeting to membrane;GO:0006508|proteolysis;	GO:0005737|cytoplasm;GO:0005829|cytosol;	GO:0004197|cysteine-type endopeptidase activity;GO:0008234|cysteine-type peptidase activity;	K08342	ATG4; cysteine protease ATG4 [EC:3.4.22.-]
ENSSSCG00000009732	3.7006633517697143	3.7516365493780834	3.382217626592668	2.667183405922115	3.776863037929114	2.8875110754612314	CHFR	protein_coding	chr14:22613548-22683966:+	gi|545868443|ref|XP_005657350.1|	3576	0.0	PREDICTED: zinc finger protein 605 [Sus scrofa]	gi|927204336|ref|XM_013990326.1|	3171	0.0	PREDICTED: Sus scrofa checkpoint with forkhead and ring finger domains, E3 ubiquitin protein ligase (CHFR), transcript variant X1, mRNA	Q86T29	332	2e-97	Zinc finger protein 605	.	.	.	.	pfam01352	KRAB	KRAB box. The KRAB domain (or Kruppel-associated box) is present in about a third of zinc finger proteins containing C2H2 fingers. The KRAB domain is found to be involved in protein-protein interactions. The KRAB domain is generally encoded by two exons. The regions coded by the two exons are known as KRAB-A and KRAB-B. The A box plays an important role in repression by binding to corepressors, w…	GO:0006355|regulation of transcription, DNA-templated;GO:0006351|transcription, DNA-templated;	GO:0005634|nucleus;	GO:0003677|DNA binding;GO:0046872|metal ion binding;GO:0003700|transcription factor activity, sequence-specific DNA binding;	K09228	KRAB; KRAB domain-containing zinc finger protein
ENSSSCG00000012566	1.7710328635671322	1.7535803901805498	1.3082164341762654	0.7066630771382694	0.84182346194976	0.5658068203922094	ENSSSCG00000012566	protein_coding	chrX:88403526-88515450:+	gi|545886234|ref|XP_005657967.1|	5232	0.0	PREDICTED: NACHT, LRR and PYD domains-containing protein 12 isoform X1 [Sus scrofa]	gi|927219548|ref|XM_005657910.2|	5372	0.0	PREDICTED: Sus scrofa NACHT, LRR and PYD domains-containing protein 3 (NLRP12L), transcript variant X7, mRNA	P59046	60.8	6e-08	NACHT, LRR and PYD domains-containing protein 12	.	.	.	.	pfam05729	NACHT	NACHT domain. This NTPase domain is found in apoptosis proteins as well as those involved in MHC transcription activation. This family is closely related to pfam00931.	GO:0006919|activation of cysteine-type endopeptidase activity involved in apoptotic process;GO:0071345|cellular response to cytokine stimulus;GO:0036336|dendritic cell migration;GO:0050710|negative regulation of cytokine secretion;GO:0070373|negative regulation of ERK1 and ERK2 cascade;GO:0043124|negative regulation of I-kappaB kinase/NF-kappaB signaling;GO:0050728|negative regulation of inflamma…	GO:0005737|cytoplasm;	GO:0005524|ATP binding;GO:0008656|cysteine-type endopeptidase activator activity involved in apoptotic process;	.	.
ENSSSCG00000012565	0.0	0.0	0.051705534901826174	0.0	0.0	0.0	ENSSSCG00000012565	protein_coding	chrX:88432946-88434197:-	gi|311276773|ref|XP_003135356.1|	1588	0.0	PREDICTED: testis-expressed sequence 13B protein [Sus scrofa]	gi|927219551|ref|XM_005657909.2|	1090	0.0	PREDICTED: Sus scrofa testis expressed 13B (TEX13B), transcript variant X1, mRNA	Q9BXU2	56.2	1e-07	Testis-expressed sequence 13B protein	.	.	.	.	pfam15186	TEX13	Testis-expressed sequence 13 protein family. The function of this family of proteins has not, as yet, been determined. However, members are thought to be encoded for by spermatogonially-expressed, germ-cell-specific genes. This family of proteins is found in eukaryotes. Proteins in this family are typically between 177 and 384 amino acids in length. There are two conserved sequence motifs: FIN an…	GO:0045087|innate immune response;GO:0046597|negative regulation of viral entry into host cell;GO:1902187|negative regulation of viral release from host cell;GO:0032897|negative regulation of viral transcription;GO:0010508|positive regulation of autophagy;GO:0043123|positive regulation of I-kappaB kinase/NF-kappaB signaling;GO:0051092|positive regulation of NF-kappaB transcription factor activity…	GO:0005737|cytoplasm;GO:0070062|extracellular exosome;GO:0005874|microtubule;	GO:0016874|ligase activity;GO:0008017|microtubule binding;GO:0051219|phosphoprotein binding;GO:0046982|protein heterodimerization activity;GO:0042803|protein homodimerization activity;GO:0008270|zinc ion binding;	.	.
ENSSSCG00000012564	3.7973084646582236	5.485778059017828	3.1407808752353503	3.4793954890570884	4.118867747959059	3.284847158324069	MID2	protein_coding	chrX:88293363-88393858:+	gi|594698661|ref|XP_007196455.1|	3220	0.0	PREDICTED: LOW QUALITY PROTEIN: probable E3 ubiquitin-protein ligase MID2 [Balaenoptera acutorostrata scammoni]	gi|927219558|ref|XM_003360410.3|	2369	0.0	PREDICTED: Sus scrofa midline 2 (MID2), transcript variant X5, mRNA	Q9QUS6	229	9e-63	Probable E3 ubiquitin-protein ligase MID2	.	.	.	.	pfam15227	zf-C3HC4_4	zinc finger of C3HC4-type, RING. This is a family of primate-specific Ret finger protein-like (RFPL) zinc-fingers of the C3HC4 type. Ret finger protein-like proteins are primate-specific target genes of Pax6, a key transcription factor for pancreas, eye and neocortex development. This domain is likely to be DNA-binding. This zinc-finger domain together with the RDM domain, pfam11002, forms a larg…	GO:0045087|innate immune response;GO:0046597|negative regulation of viral entry into host cell;GO:1902187|negative regulation of viral release from host cell;GO:0032897|negative regulation of viral transcription;GO:0010508|positive regulation of autophagy;GO:0043123|positive regulation of I-kappaB kinase/NF-kappaB signaling;GO:0051092|positive regulation of NF-kappaB transcription factor activity…	GO:0005737|cytoplasm;GO:0070062|extracellular exosome;GO:0005874|microtubule;	GO:0016874|ligase activity;GO:0008017|microtubule binding;GO:0051219|phosphoprotein binding;GO:0046982|protein heterodimerization activity;GO:0042803|protein homodimerization activity;GO:0008270|zinc ion binding;	K10647	TRIM1, MID2; midline 2 [EC:2.3.2.27]
ENSSSCG00000012562	0.0	0.0	0.0	0.0	0.13739034355971097	0.26527587744750214	NCBP2L	protein_coding	chrX:88258577-88259035:+	gi|586481212|ref|XP_006871127.1|	593	6e-73	PREDICTED: RNA-binding protein Rsf1-like [Chrysochloris asiatica]	gi|927219527|ref|XR_299672.2|	459	0.0	PREDICTED: Sus scrofa uncharacterized LOC102161152 (LOC102161152), ncRNA	B1WC40	223	3e-73	Nuclear cap-binding protein subunit 2	.	.	.	.	pfam00076	RRM_1	RNA recognition motif. (a.k.a. RRM, RBD, or RNP domain). The RRM motif is probably diagnostic of an RNA binding protein. RRMs are found in a variety of RNA binding proteins, including various hnRNP proteins, proteins implicated in regulation of alternative splicing, and protein components of snRNPs. The motif also appears in a few single stranded DNA binding proteins. The RRM structure consists o…	GO:0006370|7-methylguanosine mRNA capping;GO:0031047|gene silencing by RNA;GO:0045292|mRNA cis splicing, via spliceosome;GO:0000398|mRNA splicing, via spliceosome;GO:0051028|mRNA transport;GO:0000184|nuclear-transcribed mRNA catabolic process, nonsense-mediated decay;GO:0046833|positive regulation of RNA export from nucleus;GO:0006417|regulation of translation;GO:0008380|RNA splicing;GO:0006408|s…	GO:0005737|cytoplasm;GO:0005846|nuclear cap binding complex;GO:0005634|nucleus;	GO:0003729|mRNA binding;GO:0000166|nucleotide binding;GO:0000340|RNA 7-methylguanosine cap binding;GO:0017069|snRNA binding;	K12883	NCBP2, CBP20; nuclear cap-binding protein subunit 2
ENSSSCG00000012561	0.07691722981726724	0.07338982885391954	0.08428545187613905	0.009189926077927598	0.0	0.007893272899546446	FRMPD3	protein_coding	chrX:87960668-88053273:+	gi|927219521|ref|XP_013846439.1|	8573	0.0	PREDICTED: FERM and PDZ domain-containing protein 3, partial [Sus scrofa]	gi|927219520|ref|XM_013990985.1|	6346	0.0	PREDICTED: Sus scrofa FERM and PDZ domain containing 3 (FRMPD3), partial mRNA	Q5JV73	60.1	3e-07	FERM and PDZ domain-containing protein 3	.	.	.	.	pfam00373	FERM_M	FERM central domain. This domain is the central structural domain of the FERM domain.	.	GO:0005856|cytoskeleton;	.	.	.
ENSSSCG00000009735	0.0	0.0434959082488306	0.0	0.0	0.0	0.0	P2RX2	protein_coding	chr14:22855184-22858351:-	gi|803306700|ref|XP_012011766.1|	2030	0.0	PREDICTED: P2X purinoceptor 2 isoform X6 [Ovis aries musimon]	gi|927204347|ref|XM_003483406.3|	1023	0.0	PREDICTED: Sus scrofa purinergic receptor P2X, ligand gated ion channel, 2 (P2RX2), partial mRNA	Q9UBL9	680	0.0	P2X purinoceptor 2	.	.	.	.	pfam00864	P2X_receptor	ATP P2X receptor.	GO:0048266|behavioral response to pain;GO:0007596|blood coagulation;GO:0003029|detection of hypoxic conditions in blood by carotid body chemoreceptor signaling;GO:0007528|neuromuscular junction development;GO:0007274|neuromuscular synaptic transmission;GO:0030432|peristalsis;GO:0010524|positive regulation of calcium ion transport into cytosol;GO:0050850|positive regulation of calcium-mediated sig…	GO:0016324|apical plasma membrane;GO:0005639|integral component of nuclear inner membrane;GO:0005887|integral component of plasma membrane;GO:0005886|plasma membrane;GO:0043235|receptor complex;	GO:0005524|ATP binding;GO:0004931|extracellular ATP-gated cation channel activity;GO:0042802|identical protein binding;GO:0015276|ligand-gated ion channel activity;GO:0001614|purinergic nucleotide receptor activity;	K05216	P2RX2; P2X purinoceptor 2
ENSSSCG00000001527	107.86592610556042	127.5563779437384	115.34374008739857	100.31762454613597	91.65175109630941	93.71182868594403	C6orf106	protein_coding	chr7:30561754-30667184:-	gi|301757025|ref|XP_002914349.1|	1463	0.0	PREDICTED: uncharacterized protein C6orf106 homolog isoform X1 [Ailuropoda melanoleuca]	gi|339895849|ref|NM_001243026.1|	3112	0.0	Sus scrofa chromosome 7 open reading frame, human C6orf106 (C7H6orf106), mRNA	Q3TT38	423	4e-149	Uncharacterized protein C6orf106 homolog	.	.	.	.	pfam14555	UBA_4	UBA-like domain.	GO:0016236|macroautophagy;	GO:0005776|autophagosome;GO:0000407|pre-autophagosomal structure;	GO:0043130|ubiquitin binding;	.	.
ENSSSCG00000001523	0.5727025712719204	0.18214620135479018	0.3765384826647324	1.2521853142723398	0.3287341495772754	0.6699886843960804	GRM4	protein_coding	chr7:30179305-30267735:-	gi|194040320|ref|XP_001928404.1|	4572	0.0	PREDICTED: metabotropic glutamate receptor 4 [Sus scrofa]	gi|927156196|ref|XM_001928369.6|	3390	0.0	PREDICTED: Sus scrofa glutamate receptor, metabotropic 4 (GRM4), mRNA	Q1ZZH0	76.3	1e-12	Metabotropic glutamate receptor 4	.	.	.	.	pfam00003	7tm_3	7 transmembrane sweet-taste receptor of 3 GCPR. This is a domain of seven transmembrane regions that forms the C-terminus of some subclass 3 G-coupled-protein receptors. It is often associated with a downstream cysteine-rich linker domain, NCD3G pfam07562, which is the human sweet-taste receptor, and the N-terminal domain, ANF_receptor pfam01094. The seven TM regions assemble in such a way as to …	GO:0007196|adenylate cyclase-inhibiting G-protein coupled glutamate receptor signaling pathway;	GO:0016021|integral component of membrane;GO:0005886|plasma membrane;	GO:0004930|G-protein coupled receptor activity;GO:0008066|glutamate receptor activity;	K04607	GRM4; metabotropic glutamate receptor 4
ENSSSCG00000001521	0.0	0.0	0.0	0.0	0.07480684186703125	0.14443846707995664	MLN	protein_coding	chr7:30003291-30013128:-	gi|927156183|ref|XP_013833249.1|	471	9e-56	PREDICTED: promotilin isoform X1 [Sus scrofa]	gi|86371180|gb|DQ355970.1|	538	0.0	Sus scrofa motilin mRNA, complete cds	P01307	182	6e-56	Promotilin	.	.	.	.	pfam04643	Motilin_assoc	Motilin/ghrelin-associated peptide. This family represents a peptide sequence that lies C-terminal to motilin/ghrelin on the respective precursor peptide. Its function is unknown.	.	GO:0005576|extracellular region;	.	K05265	MLN; motilin
ENSSSCG00000001520	6.894547964284341	6.167218194228678	5.180858197021081	4.003888743842059	6.183601760130036	5.27579295557531	LEMD2	protein_coding	chr7:29978701-29997101:-	gi|545839061|ref|XP_005665949.1|	1658	0.0	PREDICTED: LEM domain-containing protein 2 [Sus scrofa]	gi|152205932|emb|CT868704.25|	2961	0.0	Pig DNA sequence from clone CH242-325C16 on chromosome 7, complete sequence	Q8NC56	72.8	2e-12	LEM domain-containing protein 2	.	.	.	.	pfam09402	MSC	Man1-Src1p-C-terminal domain. MAN1 is an integral protein of the inner nuclear membrane which binds to chromatin associated proteins and plays a role in nuclear organisation. The C terminal nucleoplasmic region forms a DNA binding winged helix and binds to Smad. This C-terminal tail is also found in S. cerevisiae and is thought to consist of three conserved helices followed by two downstream stra…	GO:0060914|heart formation;GO:0043409|negative regulation of MAPK cascade;GO:0051898|negative regulation of protein kinase B signaling;GO:0022008|neurogenesis;GO:0006998|nuclear envelope organization;GO:0035914|skeletal muscle cell differentiation;	GO:0005639|integral component of nuclear inner membrane;GO:0016020|membrane;GO:0031965|nuclear membrane;	.	.	.
ENSSSCG00000001528	319.5572813217362	326.3744864578199	376.9164697468875	291.3921629230022	303.8735320954639	236.59514011994187	RPS10	protein_coding	chr7:30435146-30442712:-	gi|432114381|gb|ELK36293.1|	790	4e-100	40S ribosomal protein S10 [Myotis davidii]	gi|346421342|ref|NM_001244106.1|	1388	0.0	Sus scrofa ribosomal protein S10 (RPS10), mRNA	P46783	303	5e-100	40S ribosomal protein S10	SPBP22H7.08	135	2e-36	COG5045	pfam03501	S10_plectin	Plectin/S10 domain. This presumed domain is found at the N-terminus of some isoforms of the cytoskeletal muscle protein plectin as well as the ribosomal S10 protein. This domain may be involved in RNA binding.	GO:0000184|nuclear-transcribed mRNA catabolic process, nonsense-mediated decay;GO:0000028|ribosomal small subunit assembly;GO:0006364|rRNA processing;GO:0006614|SRP-dependent cotranslational protein targeting to membrane;GO:0006412|translation;GO:0006413|translational initiation;GO:0019083|viral transcription;	GO:0005829|cytosol;GO:0022627|cytosolic small ribosomal subunit;GO:0070062|extracellular exosome;GO:0031012|extracellular matrix;GO:0005925|focal adhesion;GO:0016020|membrane;GO:0005730|nucleolus;GO:0005654|nucleoplasm;GO:0005840|ribosome;	GO:0044822|poly(A) RNA binding;GO:0003735|structural constituent of ribosome;	K02947	RP-S10e, RPS10; small subunit ribosomal protein S10e
ENSSSCG00000005636	57.121317316563925	30.419946762938824	38.71167216449476	17.044188437228627	33.66251904838156	48.868660276173905	SLC25A25	protein_coding	chr1:268531752-268576994:+	gi|512974490|ref|XP_004849330.1|	2644	0.0	PREDICTED: calcium-binding mitochondrial carrier protein SCaMC-2 isoform X1 [Heterocephalus glaber]	gi|371912367|dbj|AK395172.1|	2998	0.0	Sus scrofa mRNA, clone: OVRM10098D09, expressed in ovary	Q0V7M4	848	0.0	Calcium-binding mitochondrial carrier protein SCaMC-2	.	.	.	.	pfam00153	Mito_carr	Mitochondrial carrier protein.	GO:0006412|translation;GO:0055085|transmembrane transport;	GO:0016021|integral component of membrane;GO:0005743|mitochondrial inner membrane;	GO:0005509|calcium ion binding;GO:0003735|structural constituent of ribosome;	K14684	SLC25A23S; solute carrier family 25 (mitochondrial phosphate transporter), member 23/24/25/41
ENSSSCG00000005631	1.2453035129735144	0.8317359885919332	0.5210276886013995	0.4314809184157454	0.8339455425516713	0.6645260960240322	FAM102A	protein_coding	chr1:268427708-268465802:-	gi|488522387|ref|XP_004453098.1|	1139	0.0	PREDICTED: protein FAM102A isoform X1 [Dasypus novemcinctus]	gi|970718853|ref|XM_006205477.2|	2072	0.0	PREDICTED: Vicugna pacos family with sequence similarity 102 member A (FAM102A), transcript variant X1, mRNA	Q5T9C2	160	1e-149	Protein FAM102A	.	.	.	.	pfam10358	NT-C2	N-terminal C2 in EEIG1 and EHBP1 proteins. This version of the C2 domain was initally identified in the vertebrate estrogen early-induced gene 1 (EEIG1), and its Drosophila ortholog required for uptake of dsRNA via the endocytotic machinery to induce RNAi silencing. It is also in C.elegans ortholog Sym-3 (SYnthetic lethal with Mec-3) and the mammalian protein EHBP1 (EH domain Binding Protein-1) t…	GO:0030308|negative regulation of cell growth;GO:1902108|regulation of mitochondrial membrane permeability involved in apoptotic process;	GO:0005739|mitochondrion;GO:0005654|nucleoplasm;GO:0005886|plasma membrane;	.	.	.
ENSSSCG00000005630	0.369910583352402	1.058839786663452	0.6632932255082752	0.477319190835391	0.21233053095591695	0.40997181060068505	NAIF1	protein_coding	chr1:268527327-268530563:-	gi|350579691|ref|XP_003480664.1|	1120	1e-150	PREDICTED: LOW QUALITY PROTEIN: nuclear apoptosis-inducing factor 1 [Sus scrofa]	gi|927099484|ref|XM_003480616.3|	499	0.0	PREDICTED: Sus scrofa nuclear apoptosis inducing factor 1 (NAIF1), mRNA	A7MBH3	423	4e-147	Nuclear apoptosis-inducing factor 1	.	.	.	.	pfam13873	Myb_DNA-bind_5	Myb/SANT-like DNA-binding domain. This presumed domain appears to be related to other Myb/SANT like DNA binding domains. This family is greatly expanded in arthropods and higher eukaryotes.	GO:0030308|negative regulation of cell growth;GO:1902108|regulation of mitochondrial membrane permeability involved in apoptotic process;	GO:0005739|mitochondrion;GO:0005654|nucleoplasm;GO:0005634|nucleus;GO:0005886|plasma membrane;	.	.	.
ENSSSCG00000005638	1.455423222545471	1.3558745362740476	0.9555366228319229	1.4417910780892733	1.721272657848305	1.0055071832491593	LCN2	protein_coding	chr1:268609633-268621997:+	gi|528763624|gb|EPY83283.1|	961	3e-116	neutrophil gelatinase-associated lipocalin-like protein [Camelus ferus]	gi|288780449|dbj|AK349983.1|	1155	0.0	Sus scrofa mRNA, clone:SMG010015G03, expressed in submaxillary gland	P80188	243	1e-71	Neutrophil gelatinase-associated lipocalin	.	.	.	.	pfam00061	Lipocalin	Lipocalin / cytosolic fatty-acid binding protein family. Lipocalins are transporters for small hydrophobic molecules, such as lipids, steroid hormones, bilins, and retinoids. The family also encompasses the enzyme prostaglandin D synthase (EC:5.3.99.2). Alignment subsumes both the lipocalin and fatty acid binding protein signatures from PROSITE. This is supported on structural and functional grou…	GO:0006915|apoptotic process;GO:0006879|cellular iron ion homeostasis;GO:0045087|innate immune response;GO:0006811|ion transport;GO:0015891|siderophore transport;	GO:0005623|cell;GO:0070062|extracellular exosome;GO:0005576|extracellular region;GO:0005615|extracellular space;	GO:0005506|iron ion binding;GO:0036094|small molecule binding;GO:0005215|transporter activity;	.	.
ENSSSCG00000037251	46.99920860632108	44.55956751021048	41.269429955641314	42.44904736124231	41.32887826267373	37.28519900544332	ENSSSCG00000037251	protein_coding	chr9:12278150-12305181:+	gi|927174370|ref|XP_005667226.2|	632	1e-79	PREDICTED: mth938 domain-containing protein [Sus scrofa]	gi|927174369|ref|XM_005667169.2|	384	0.0	PREDICTED: Sus scrofa adipogenesis associated, Mth938 domain containing (AAMDC), mRNA	Q32PA8	240	2e-78	Mth938 domain-containing protein	AF0029	52.8	5e-08	COG1504	pfam04430	DUF498	Protein of unknown function (DUF498/DUF598). This is a large family of uncharacterized proteins found in all domains of life. The structure shows a novel fold with three beta sheets. A dimeric form is found in the crystal structure. It was suggested that the cleft in between the two monomers might bing nucleic acid.	GO:0043066|negative regulation of apoptotic process;GO:0045600|positive regulation of fat cell differentiation;GO:0045944|positive regulation of transcription from RNA polymerase II promoter;	GO:0005737|cytoplasm;	.	.	.
ENSSSCG00000037254	6.698716921202749	4.415567265500034	4.738946859442059	3.3764770253377945	4.9923322048709675	3.335083713421735	RNPC3	protein_coding	chr4:115243183-115311972:-	gi|545823951|ref|XP_005663688.1|	2334	0.0	PREDICTED: RNA-binding protein 40 isoform X2 [Sus scrofa]	gi|927124899|ref|XM_005663634.2|	3768	0.0	PREDICTED: Sus scrofa RNA-binding region (RNP1, RRM) containing 3 (RNPC3), transcript variant X5, mRNA	Q3MHP0	845	0.0	RNA-binding protein 40	CAP0098	67.4	2e-10	COG0366	pfam02806	Alpha-amylase_C	Alpha amylase, C-terminal all-beta domain. Alpha amylase is classified as family 13 of the glycosyl hydrolases. The structure is an 8 stranded alpha/beta barrel containing the active site, interrupted by a ~70 a.a. calcium-binding domain protruding between beta strand 3 and alpha helix 3, and a carboxyl-terminal Greek key beta-barrel domain.	GO:0032502|developmental process;GO:0000398|mRNA splicing, via spliceosome;GO:0008380|RNA splicing;	GO:0005654|nucleoplasm;GO:0005634|nucleus;GO:0005689|U12-type spliceosomal complex;	GO:0000166|nucleotide binding;GO:0097157|pre-mRNA intronic binding;GO:0030626|U12 snRNA binding;	K13157	RNPC3; U11/U12 small nuclear ribonucleoprotein 65 kDa protein
ENSSSCG00000037256	0.6608327413874491	0.6305271511559803	0.0	0.1776488717770816	0.7902527279938263	0.0	ENSSSCG00000037256	protein_coding	chr9:81823373-81869065:-	gi|826277819|ref|XP_012494192.1|	319	5e-34	PREDICTED: transmembrane protein 106B [Propithecus coquereli]	.	.	.	.	Q3ZC25	125	2e-34	Transmembrane protein 106B	.	.	.	.	pfam07092	DUF1356	Protein of unknown function (DUF1356). This family consists of several hypothetical mammalian proteins of around 250 residues in length. The function of this family is unknown.	GO:0048813|dendrite morphogenesis;GO:0007041|lysosomal transport;GO:0032418|lysosome localization;GO:0007040|lysosome organization;GO:1900006|positive regulation of dendrite development;	GO:0070062|extracellular exosome;GO:0016021|integral component of membrane;GO:0031902|late endosome membrane;GO:0005765|lysosomal membrane;	.	.	.
ENSSSCG00000037257	0.0	0.0775047237557721	0.0	0.0	0.038855309731304584	0.0	ENSSSCG00000037257	protein_coding	chr6:61771021-61774796:-	gi|821419301|ref|XP_012393513.1|	2096	0.0	PREDICTED: zinc finger protein 548-like isoform X1 [Orcinus orca]	gi|371912185|dbj|AK392006.1|	1427	0.0	Sus scrofa mRNA, clone: HTMT10042C06, expressed in hypothalamus	Q8NEK5	100	8e-23	Zinc finger protein 548	.	.	.	.	pfam01352	KRAB	KRAB box. The KRAB domain (or Kruppel-associated box) is present in about a third of zinc finger proteins containing C2H2 fingers. The KRAB domain is found to be involved in protein-protein interactions. The KRAB domain is generally encoded by two exons. The regions coded by the two exons are known as KRAB-A and KRAB-B. The A box plays an important role in repression by binding to corepressors, w…	GO:0006355|regulation of transcription, DNA-templated;GO:0006351|transcription, DNA-templated;	GO:0005634|nucleus;	GO:0046872|metal ion binding;GO:0000977|RNA polymerase II regulatory region sequence-specific DNA binding;GO:0003700|transcription factor activity, sequence-specific DNA binding;	K09228	KRAB; KRAB domain-containing zinc finger protein
ENSSSCG00000010079	4.96237125716592	5.1870776587204315	3.9178271428926426	2.9945611617398753	3.812072608912601	3.187692052289664	PPM1F	protein_coding	chr14:50040659-50063325:+	gi|335301484|ref|XP_001926892.2|	1966	0.0	PREDICTED: protein phosphatase 1F [Sus scrofa]	gi|927205869|ref|XM_001926857.4|	4409	0.0	PREDICTED: Sus scrofa protein phosphatase, Mg2+/Mn2+ dependent, 1F (PPM1F), mRNA	P49593	577	0.0	Protein phosphatase 1F	YDL006w	107	9e-24	COG0631	pfam00481	PP2C	Protein phosphatase 2C. Protein phosphatase 2C is a Mn++ or Mg++ dependent protein serine/threonine phosphatase.	GO:0035690|cellular response to drug;GO:0016576|histone dephosphorylation;GO:0097193|intrinsic apoptotic signaling pathway;GO:0033137|negative regulation of peptidyl-serine phosphorylation;GO:0006469|negative regulation of protein kinase activity;GO:0044387|negative regulation of protein kinase activity by regulation of protein phosphorylation;GO:0045892|negative regulation of transcription, DNA-…	GO:0005829|cytosol;GO:0048471|perinuclear region of cytoplasm;GO:0043234|protein complex;	GO:0033192|calmodulin-dependent protein phosphatase activity;GO:0046872|metal ion binding;GO:0016791|phosphatase activity;GO:0004722|protein serine/threonine phosphatase activity;	K17502	PPM1F, POPX2; protein phosphatase 1F [EC:3.1.3.16]
ENSSSCG00000002313	0.13556414591958466	0.04850520565126661	0.0	0.018221568082019423	0.03242270832591637	0.0782529741313647	SLC10A1	protein_coding	chr7:93324366-93421776:-	gi|194038495|ref|XP_001927730.1|	1473	0.0	PREDICTED: sodium/bile acid cotransporter [Sus scrofa]	gi|109639101|emb|CT737423.5|	2845	0.0	Pig DNA sequence from clone CH242-28F9 on chromosome 7, complete sequence	Q14973	455	6e-147	Sodium/bile acid cotransporter	SA2112	67.4	6e-11	COG0385	pfam01758	SBF	Sodium Bile acid symporter family. This family consists of Na+/bile acid co-transporters. These transmembrane proteins function in the liver in the uptake of bile acids from portal blood plasma a process mediated by the co-transport of Na+. Also in the family is ARC3 from S. cerevisiae, a putative transmembrane protein involved in resistance to arsenic compounds.	GO:0015721|bile acid and bile salt transport;GO:0006810|transport;	GO:0016323|basolateral plasma membrane;GO:0005887|integral component of plasma membrane;GO:0005886|plasma membrane;	GO:0008508|bile acid:sodium symporter activity;GO:0001618|virus receptor activity;	K14341	SLC10A1, NTCP; solute carrier family 10 (sodium/bile acid cotransporter), member 1
ENSSSCG00000025408	0.253161688868831	0.28319862708853233	0.10957382724129551	0.1314192289427596	0.08351498833784576	0.08868877666749027	ULK4	protein_coding	chr13:25210498-25751513:-	gi|594072285|ref|XP_006059982.1|	5943	0.0	PREDICTED: serine/threonine-protein kinase ULK4 isoform X1 [Bubalus bubalis]	gi|821404934|ref|XM_004277864.2|	3006	0.0	PREDICTED: Orcinus orca unc-51 like kinase 4 (ULK4), mRNA	Q5R4M2	2041	0.0	Serine/threonine-protein kinase ULK4	.	.	.	.	pfam00069	Pkinase	Protein kinase domain.	.	.	GO:0005524|ATP binding;GO:0004674|protein serine/threonine kinase activity;	K17545	ULK4; serine/threonine-protein kinase ULK4 [EC:2.7.11.1]
ENSSSCG00000028679	27.306428376473594	30.516377281596004	25.971867535264785	29.79907486637516	28.323436208462635	29.646154161550594	PLEKHB2	protein_coding	chr15:57428275-57489081:+	gi|594073719|ref|XP_006060675.1|	833	2e-99	PREDICTED: pleckstrin homology domain-containing family B member 2 isoform X2 [Bubalus bubalis]	gi|927212166|ref|XM_013984687.1|	3341	0.0	PREDICTED: Sus scrofa pleckstrin homology domain containing, family B (evectins) member 2 (PLEKHB2), mRNA	Q5R4K6	311	2e-96	Pleckstrin homology domain-containing family B member 2	.	.	.	.	pfam00169	PH	PH domain. PH stands for pleckstrin homology.	GO:0045595|regulation of cell differentiation;	GO:0016021|integral component of membrane;GO:0055038|recycling endosome membrane;	.	.	.
ENSSSCG00000028677	0.13045134075113024	0.17234152837578975	0.21592118030551008	0.0755325466392737	0.20159925735607462	0.14828634830068926	ENSSSCG00000028677	protein_coding	chr13:157504281-157522344:-	gi|545866433|ref|XP_005657178.1|	1899	0.0	PREDICTED: mitochondrial ribonuclease P protein 1 isoform X2 [Sus scrofa]	gi|927202747|ref|XM_013990166.1|	1951	0.0	PREDICTED: Sus scrofa tRNA methyltransferase 10 homolog C (S. cerevisiae) (TRMT10C), transcript variant X5, mRNA	A6NC97	665	0.0	Putative protein FAM172B	.	.	.	.	pfam09757	Arb2	Arb2 domain. A second fission yeast Argonaute complex (Argonaute siRNA chaperone, ARC) that contains two previously uncharacterized proteins, Arb1 and Arb2, both of which are required for histone H3 Lys9 (H3-K9) methylation, heterochromatin assembly and siRNA generation. This family includes a region found in Arb2 and the Hda1 protein.	.	GO:0016021|integral component of membrane;	.	.	.
ENSSSCG00000028674	0.023952785593531263	0.0	0.021475082264820974	0.10302601720792959	0.08020261152931529	0.0	CR2	protein_coding	chr9:68025553-68065152:+	gi|927179261|ref|XP_013835117.1|	7774	0.0	PREDICTED: complement receptor type 1 [Sus scrofa]	gi|927179260|ref|XM_013979663.1|	4353	0.0	PREDICTED: Sus scrofa complement receptor type 1 (LOC100623585), mRNA	P20023	270	3e-76	Complement receptor type 2	.	.	.	.	pfam00084	Sushi	Sushi domain (SCR repeat).	GO:0030183|B cell differentiation;GO:0042100|B cell proliferation;GO:0006958|complement activation, classical pathway;GO:0006955|immune response;GO:0045087|innate immune response;	GO:0070062|extracellular exosome;GO:0016021|integral component of membrane;GO:0005886|plasma membrane;GO:0043235|receptor complex;	GO:0001848|complement binding;GO:0004875|complement receptor activity;GO:0003677|DNA binding;GO:0042803|protein homodimerization activity;GO:0004888|transmembrane signaling receptor activity;GO:0001618|virus receptor activity;	K04012	CR2, CD21; complement receptor type 2
ENSSSCG00000040570	13.102891308033854	12.529503807486124	11.372730204603725	10.447058931013219	14.686465907284346	11.768781864157956	C11orf58	protein_coding	chr2:42322008-42364536:-	gi|349585075|ref|NP_001231802.1|	690	1e-79	small acidic protein [Sus scrofa]	gi|927102820|ref|XR_001306945.1|	3151	0.0	PREDICTED: Sus scrofa uncharacterized LOC106509407 (LOC106509407), ncRNA	Q3MHL8	259	3e-77	Small acidic protein	.	.	.	.	pfam15477	SMAP	Small acidic protein family. This domain family is found in eukaryotes, and is approximately 70 amino acids in length. There is a single completely conserved residue G that may be functionally important.	GO:0019369|arachidonic acid metabolic process;GO:0050482|arachidonic acid secretion;GO:0007411|axon guidance;GO:0042632|cholesterol homeostasis;GO:0016042|lipid catabolic process;GO:0051977|lysophospholipid transport;GO:0090370|negative regulation of cholesterol efflux;GO:0043433|negative regulation of sequence-specific DNA binding transcription factor activity;GO:0006654|phosphatidic acid biosyn…	GO:0005576|extracellular region;	GO:0005509|calcium ion binding;GO:0004623|phospholipase A2 activity;GO:0004620|phospholipase activity;	.	.
ENSSSCG00000026433	0.0	0.0	0.011992578407627297	0.0	0.0	0.0	CCDC73	protein_coding	chr2:28094406-28259366:+	gi|927102555|ref|XP_013849921.1|	4695	0.0	PREDICTED: coiled-coil domain-containing protein 73 isoform X7 [Sus scrofa]	gi|927102546|ref|XM_013994463.1|	2309	0.0	PREDICTED: Sus scrofa coiled-coil domain containing 73 (CCDC73), transcript variant X3, mRNA	Q6ZRK6	72.0	3e-11	Coiled-coil domain-containing protein 73	.	.	.	.	pfam02463	SMC_N	RecF/RecN/SMC N terminal domain. This domain is found at the N terminus of SMC proteins. The SMC (structural maintenance of chromosomes) superfamily proteins have ATP-binding domains at the N- and C-termini, and two extended coiled-coil domains separated by a hinge in the middle. The eukaryotic SMC proteins form two kind of heterodimers: the SMC1/SMC3 and the SMC2/SMC4 types. These heterodimers c…	GO:0071243|cellular response to arsenic-containing substance;GO:0071470|cellular response to osmotic stress;GO:0007059|chromosome segregation;GO:0008625|extrinsic apoptotic signaling pathway via death domain receptors;GO:0045087|innate immune response;GO:0035556|intracellular signal transduction;GO:0097193|intrinsic apoptotic signaling pathway;GO:0042256|mature ribosome assembly;GO:0043066|negati…	GO:0005913|cell-cell adherens junction;GO:0005737|cytoplasm;GO:0010494|cytoplasmic stress granule;GO:0070062|extracellular exosome;GO:0005741|mitochondrial outer membrane;GO:0016607|nuclear speck;GO:0005634|nucleus;	GO:0005524|ATP binding;GO:0004003|ATP-dependent DNA helicase activity;GO:0004004|ATP-dependent RNA helicase activity;GO:0016887|ATPase activity;GO:0098641|cadherin binding involved in cell-cell adhesion;GO:0043273|CTPase activity;GO:0003677|DNA binding;GO:0008190|eukaryotic initiation factor 4E binding;GO:0003924|GTPase activity;GO:0048027|mRNA 5'-UTR binding;GO:0017111|nucleoside-triphosphatase …	.	.
ENSSSCG00000026430	17.752250123216477	19.77282555097491	17.277341768734953	12.092360611314508	15.832211252777093	20.88755276810193	DDX3Y	protein_coding	chrY:9153466-9171279:-	gi|927220685|ref|XP_013846518.1|	3187	0.0	PREDICTED: ATP-dependent RNA helicase DDX3X-like isoform X3 [Sus scrofa]	gi|927220684|ref|XM_013991064.1|	4622	0.0	PREDICTED: Sus scrofa ATP-dependent RNA helicase DDX3X-like (LOC100624590), transcript variant X4, mRNA	O00571	1134	0.0	ATP-dependent RNA helicase DDX3X	.	.	.	.	pfam00270	DEAD	DEAD/DEAH box helicase. Members of this family include the DEAD and DEAH box helicases. Helicases are involved in unwinding nucleic acids. The DEAD box helicases are involved in various aspects of RNA metabolizm, including nuclear transcription, pre mRNA splicing, ribosome biogenesis, nucleocytoplasmic transport, translation, RNA decay and organellar gene expression.	GO:0071243|cellular response to arsenic-containing substance;GO:0071470|cellular response to osmotic stress;GO:0007059|chromosome segregation;GO:0008625|extrinsic apoptotic signaling pathway via death domain receptors;GO:0045087|innate immune response;GO:0035556|intracellular signal transduction;GO:0097193|intrinsic apoptotic signaling pathway;GO:0042256|mature ribosome assembly;GO:0043066|negati…	GO:0005913|cell-cell adherens junction;GO:0005737|cytoplasm;GO:0010494|cytoplasmic stress granule;GO:0070062|extracellular exosome;GO:0005741|mitochondrial outer membrane;GO:0016607|nuclear speck;GO:0005634|nucleus;	GO:0005524|ATP binding;GO:0004003|ATP-dependent DNA helicase activity;GO:0004004|ATP-dependent RNA helicase activity;GO:0016887|ATPase activity;GO:0098641|cadherin binding involved in cell-cell adhesion;GO:0043273|CTPase activity;GO:0003677|DNA binding;GO:0008190|eukaryotic initiation factor 4E binding;GO:0003924|GTPase activity;GO:0048027|mRNA 5'-UTR binding;GO:0017111|nucleoside-triphosphatase …	K11594	DDX3X, bel; ATP-dependent RNA helicase DDX3X [EC:3.6.4.13]
ENSSSCG00000028671	0.0	0.0	0.04914713213537407	0.14736361712901364	0.0	0.0	CEL	protein_coding	chr1:272763226-272770353:+	gi|335281148|ref|XP_003353742.1|	2949	0.0	PREDICTED: bile salt-activated lipase [Sus scrofa]	gi|927099794|ref|XM_003353694.3|	1413	0.0	PREDICTED: Sus scrofa carboxyl ester lipase (CEL), mRNA	P19835	58.5	1e-07	Bile salt-activated lipase	BS_pnbA	160	4e-41	COG2272	pfam00135	COesterase	Carboxylesterase family.	GO:0006707|cholesterol catabolic process;GO:0009062|fatty acid catabolic process;GO:0030299|intestinal cholesterol absorption;GO:0044258|intestinal lipid catabolic process;GO:0044241|lipid digestion;GO:0006629|lipid metabolic process;GO:0050804|modulation of synaptic transmission;GO:0007158|neuron cell-cell adhesion;GO:0030157|pancreatic juice secretion;GO:0018350|protein esterification;GO:000741…	GO:0009986|cell surface;GO:0005737|cytoplasm;GO:0070062|extracellular exosome;GO:0005576|extracellular region;GO:0005615|extracellular space;GO:0005887|integral component of plasma membrane;GO:0045202|synapse;	GO:0047372|acylglycerol lipase activity;GO:0052689|carboxylic ester hydrolase activity;GO:0003824|catalytic activity;GO:0008201|heparin binding;GO:0016787|hydrolase activity;GO:0042043|neurexin family protein binding;GO:0004872|receptor activity;GO:0004771|sterol esterase activity;GO:0004806|triglyceride lipase activity;	.	.
ENSSSCG00000015030	15.605867477304018	14.042313363403595	14.394407397697972	18.251928162131847	17.38460242394901	20.628655049468236	DLAT	protein_coding	chr9:39738640-39767879:+	gi|47522814|ref|NP_999159.1|	2831	0.0	dihydrolipoyllysine-residue acetyltransferase component of pyruvate dehydrogenase complex, mitochondrial precursor [Sus scrofa]	gi|47522813|ref|NM_213994.1|	2504	0.0	Sus scrofa dihydrolipoamide S-acetyltransferase (DLAT), mRNA	P10515	1013	0.0	Dihydrolipoyllysine-residue acetyltransferase component of pyruvate dehydrogenase complex, mitochondrial	SPCC794.07	394	3e-120	COG0508	pfam00198	2-oxoacid_dh	2-oxoacid dehydrogenases acyltransferase (catalytic domain). These proteins contain one to three copies of a lipoyl binding domain followed by the catalytic domain.	GO:0006086|acetyl-CoA biosynthetic process from pyruvate;GO:0006006|glucose metabolic process;GO:0046487|glyoxylate metabolic process;GO:0006090|pyruvate metabolic process;GO:0010510|regulation of acetyl-CoA biosynthetic process from pyruvate;GO:0030431|sleep;GO:0006099|tricarboxylic acid cycle;	GO:0005759|mitochondrial matrix;GO:0005967|mitochondrial pyruvate dehydrogenase complex;GO:0005739|mitochondrion;GO:0043209|myelin sheath;GO:0045254|pyruvate dehydrogenase complex;	GO:0004742|dihydrolipoyllysine-residue acetyltransferase activity;	K00627	DLAT, aceF, pdhC; pyruvate dehydrogenase E2 component (dihydrolipoamide acetyltransferase) [EC:2.3.1.12]
ENSSSCG00000015031	0.7157227573658853	0.8194799130659159	0.44918130808850293	0.8465807798367113	0.753185499058611	0.9254412532451947	PIH1D2	protein_coding	chr9:39767975-39774508:-	gi|311263889|ref|XP_003129900.1|	1484	0.0	PREDICTED: PIH1 domain-containing protein 2 [Sus scrofa]	gi|545848530|ref|XM_003129852.2|	837	0.0	PREDICTED: Sus scrofa PIH1 domain containing 2 (PIH1D2), mRNA	Q32LH3	500	1e-177	PIH1 domain-containing protein 2	.	.	.	.	pfam08190	PIH1	pre-RNA processing PIH1/Nop17. This domain is involved in pre-rRNA processing. It has has been shown to be required either for nucleolar retention or correct assembly of the box C/D snoRNP in Saccharomyces cerevisiae. The C-terminal region of this family has similarity to the CS domain pfam04969.	GO:0000492|box C/D snoRNP assembly;GO:0006364|rRNA processing;	GO:0005737|cytoplasm;GO:0030529|ribonucleoprotein complex;GO:0097255|R2TP complex;	.	.	.
ENSSSCG00000015034	99.49029024129145	89.46703713684467	95.97930100223986	99.45444861138803	108.81890332297499	106.56502149453296	SDHD	protein_coding	chr9:39790637-39803942:+	gi|56788504|gb|AAW29970.1|	655	7e-81	succinate dehydrogenase complex subunit D precursor [Sus scrofa]	gi|371923416|dbj|AK400044.1|	1266	0.0	Sus scrofa mRNA, clone: HTMT10138B11, expressed in hypothalamus	A5GZW8	256	3e-82	Succinate dehydrogenase [ubiquinone] cytochrome b small subunit, mitochondrial	.	.	.	.	pfam05328	CybS	CybS. This family consists of several eukaryotic succinate dehydrogenase [ubiquinone] cytochrome B small subunit, mitochondrial precursor (CybS) proteins. SDHD encodes the small subunit (cybS) of cytochrome b in succinate-ubiquinone oxidoreductase (mitochondrial complex II). Mitochondrial complex II is involved in the Krebs cycle and in the aerobic electron transport chain. It contains four prote…	GO:0006099|tricarboxylic acid cycle;	GO:0016021|integral component of membrane;GO:0005743|mitochondrial inner membrane;GO:0005749|mitochondrial respiratory chain complex II, succinate dehydrogenase complex (ubiquinone);	GO:0020037|heme binding;GO:0046872|metal ion binding;GO:0048039|ubiquinone binding;	K00237	SDHD, SDH4; succinate dehydrogenase (ubiquinone) membrane anchor subunit
ENSSSCG00000015035	0.5425355222501896	1.5529650204397296	0.2432075160197009	0.09723168702202409	0.6055352179113187	0.375807493050628	C11orf52	protein_coding	chr9:39647797-39655223:+	gi|311263887|ref|XP_003129889.1|	618	6e-75	PREDICTED: uncharacterized protein C11orf52 homolog [Sus scrofa]	gi|927176174|ref|XM_003129841.3|	1437	0.0	PREDICTED: Sus scrofa chromosome 9 open reading frame, human C11orf52 (C9H11orf52), mRNA	Q96A22	148	5e-41	Uncharacterized protein C11orf52	.	.	.	.	pfam15147	DUF4578	Domain of unknown function (DUF4578). This family of proteins is found in eukaryotes. Proteins in this family are typically between 44 and 137 amino acids in length.	.	GO:0070062|extracellular exosome;	.	.	.
ENSSSCG00000015036	0.956676050821788	1.4133726590518887	0.9960577481930447	0.8627946609622869	0.708563681954015	1.026081132711265	DIXDC1	protein_coding	chr9:39666743-39731734:+	gi|335294883|ref|XP_003129917.2|	2919	0.0	PREDICTED: dixin isoform X1 [Sus scrofa]	gi|927176163|ref|XM_013979370.1|	1503	0.0	PREDICTED: Sus scrofa DIX domain containing 1 (DIXDC1), transcript variant X2, mRNA	Q155Q3	983	0.0	Dixin	ECU09g0290	50.8	9e-06	COG5069	pfam00778	DIX	DIX domain. The DIX domain is present in Dishevelled and axin. This domain is involved in homo- and hetero-oligomerization. It is involved in the homo- oligomerization of mouse axin. The axin DIX domain also interacts with the dishevelled DIX domain. The DIX domain has also been called the DAX domain.	GO:0060070|canonical Wnt signaling pathway;GO:0007049|cell cycle;GO:0021799|cerebral cortex radially oriented cell migration;GO:0021869|forebrain ventricular zone progenitor cell division;GO:0045665|negative regulation of neuron differentiation;GO:0090263|positive regulation of canonical Wnt signaling pathway;GO:0032956|regulation of actin cytoskeleton organization;GO:0070507|regulation of microt…	GO:0005737|cytoplasm;GO:0005829|cytosol;GO:0005925|focal adhesion;	GO:0043015|gamma-tubulin binding;	.	.
ENSSSCG00000015037	0.8743737561983528	2.2710825962141805	0.5661698917510944	0.36563986652423647	0.5111892738636556	1.0318782012576566	IL18	protein_coding	chr9:39839118-39861196:-	gi|47522820|ref|NP_999162.1|	1015	3e-134	interleukin-18 precursor [Sus scrofa]	gi|927176186|ref|XM_005667326.2|	766	0.0	PREDICTED: Sus scrofa interleukin 18 (IL18), transcript variant X1, mRNA	O19073	395	1e-135	Interleukin-18	.	.	.	.	pfam00340	IL1	Interleukin-1 / 18. This family includes interleukin-1 and interleukin-18.	GO:0001525|angiogenesis;GO:0071222|cellular response to lipopolysaccharide;GO:0071407|cellular response to organic cyclic compound;GO:0008625|extrinsic apoptotic signaling pathway via death domain receptors;GO:0006955|immune response;GO:0006954|inflammatory response;GO:0042095|interferon-gamma biosynthetic process;GO:0031663|lipopolysaccharide-mediated signaling pathway;GO:0000165|MAPK cascade;GO…	GO:0070062|extracellular exosome;GO:0005615|extracellular space;GO:0005622|intracellular;	GO:0005125|cytokine activity;	K05482	IL18, IL1F4; interleukin 18
ENSSSCG00000015039	0.16156388714068146	0.28261679599914197	0.21727730291465924	0.05791004888811729	0.051521378834891614	0.0	BCO2	protein_coding	chr9:39864135-39916486:+	gi|335294894|ref|XP_003129902.2|	2947	0.0	PREDICTED: beta,beta-carotene 9',10'-oxygenase isoform X2 [Sus scrofa]	gi|927176216|ref|XM_003129854.4|	2088	0.0	PREDICTED: Sus scrofa beta-carotene oxygenase 2 (BCO2), transcript variant X2, mRNA	Q8HXG8	65.9	6e-10	Beta,beta-carotene 9',10'-oxygenase	all4284	90.1	3e-19	COG3670	pfam03055	RPE65	Retinal pigment epithelial membrane protein. This family represents a retinal pigment epithelial membrane receptor which is abundantly expressed in retinal pigment epithelium, and binds plasma retinal binding protein. The family also includes the sequence related neoxanthin cleavage enzyme in plants and lignostilbene-alpha,beta-dioxygenase in bacteria.	GO:0016121|carotene catabolic process;GO:0016119|carotene metabolic process;GO:0016116|carotenoid metabolic process;GO:0055114|oxidation-reduction process;GO:0051881|regulation of mitochondrial membrane potential;GO:2000377|regulation of reactive oxygen species metabolic process;GO:0042574|retinal metabolic process;GO:0042573|retinoic acid metabolic process;GO:0001523|retinoid metabolic process;G…	GO:0005622|intracellular;GO:0005759|mitochondrial matrix;GO:0005739|mitochondrion;	GO:0046872|metal ion binding;GO:0016702|oxidoreductase activity, acting on single donors with incorporation of molecular oxygen, incorporation of two atoms of oxygen;	K10252	BCDO2; beta,beta-carotene 9',10'-dioxygenase [EC:1.13.11.71]
ENSSSCG00000002368	0.7204160213486124	1.18654528786525	0.5382461420108134	0.6455546433429469	1.2225166518855313	0.5465490706895549	LTBP2	protein_coding	chr7:97746110-97852479:-	gi|545842362|ref|XP_005656461.1|	8627	0.0	PREDICTED: latent-transforming growth factor beta-binding protein 2 isoform X1 [Sus scrofa]	gi|927162403|ref|XM_005656404.2|	6852	0.0	PREDICTED: Sus scrofa latent transforming growth factor beta binding protein 2 (LTBP2), transcript variant X1, mRNA	Q28019	2826	0.0	Latent-transforming growth factor beta-binding protein 2	.	.	.	.	pfam00683	TB	TB domain. This domain is also known as the 8 cysteine domain. This family includes the hybrid domains. This cysteine rich repeat is found in TGF binding protein and fibrillin.	.	GO:0071953|elastic fiber;GO:0001527|microfibril;	GO:0005509|calcium ion binding;GO:0008201|heparin binding;GO:0050436|microfibril binding;	K08023	LTBP2_3_4; latent transforming growth factor beta binding protein 2/3/4
ENSSSCG00000009197	0.05400906673772883	0.03864917041856353	0.0	0.014519029053473078	0.0	0.0	ENSSSCG00000009197	protein_coding	chr8:125819941-126451187:-	gi|965844607|ref|XP_011992682.2|	3260	0.0	PREDICTED: glutamate receptor ionotropic, delta-2 isoform X2, partial [Ovis aries musimon]	gi|755723451|ref|XM_011281789.1|	3994	0.0	PREDICTED: Felis catus glutamate receptor, ionotropic, delta 2 (GRID2), mRNA	O43424	426	8e-126	Glutamate receptor ionotropic, delta-2	.	.	.	.	pfam00060	Lig_chan	Ligand-gated ion channel. This family includes the four transmembrane regions of the ionotropic glutamate receptors and NMDA receptors.	GO:0034613|cellular protein localization;GO:0021707|cerebellar granule cell differentiation;GO:0060079|excitatory postsynaptic potential;GO:0007215|glutamate receptor signaling pathway;GO:0007157|heterophilic cell-cell adhesion via plasma membrane cell adhesion molecules;GO:0060134|prepulse inhibition;GO:0043523|regulation of neuron apoptotic process;GO:0010975|regulation of neuron projection dev…	GO:0030054|cell junction;GO:0043197|dendritic spine;GO:0005887|integral component of plasma membrane;GO:0008328|ionotropic glutamate receptor complex;GO:0005886|plasma membrane;GO:0045211|postsynaptic membrane;GO:0045202|synapse;	GO:0005234|extracellular-glutamate-gated ion channel activity;GO:0008066|glutamate receptor activity;GO:0004970|ionotropic glutamate receptor activity;GO:0030165|PDZ domain binding;GO:0097110|scaffold protein binding;	K05207	GRID2; glutamate receptor delta-2 subunit
ENSSSCG00000009194	0.3687723969420869	0.1759303030148505	0.08265654040949275	0.0	0.2645965078066042	0.0	HPGDS	protein_coding	chr8:125382952-125405815:+	gi|335294075|ref|XP_003357127.1|	1060	3e-144	PREDICTED: hematopoietic prostaglandin D synthase [Sus scrofa]	gi|927171225|ref|XM_005666983.2|	609	0.0	PREDICTED: Sus scrofa hematopoietic prostaglandin D synthase (HPGDS), transcript variant X2, mRNA	O60760	377	8e-132	Hematopoietic prostaglandin D synthase	.	.	.	.	pfam02798	GST_N	Glutathione S-transferase, N-terminal domain. Function: conjugation of reduced glutathione to a variety of targets. Also included in the alignment, but are not GSTs: * S-crystallins from squid. Similarity to GST previously noted. * Eukaryotic elongation factors 1-gamma. Not known to have GST activity; similarity not previously recognized. * HSP26 family of stress-related proteins. including auxin…	GO:0019371|cyclooxygenase pathway;GO:1901687|glutathione derivative biosynthetic process;GO:0007626|locomotory behavior;GO:2000255|negative regulation of male germ cell proliferation;GO:0006693|prostaglandin metabolic process;GO:0007165|signal transduction;	GO:0005737|cytoplasm;GO:0005829|cytosol;	GO:0005509|calcium ion binding;GO:0004364|glutathione transferase activity;GO:0000287|magnesium ion binding;GO:0004667|prostaglandin-D synthase activity;GO:0042803|protein homodimerization activity;	K04097	gst; glutathione S-transferase [EC:2.5.1.18]
ENSSSCG00000009192	68.06877578645496	70.56576950780791	69.99290361495892	82.0270673312066	97.31131752140746	69.37598161802545	PDLIM5	protein_coding	chr8:125043881-125260702:-	gi|982927990|ref|XP_015327022.1|	2729	0.0	PREDICTED: PDZ and LIM domain protein 5 isoform X6 [Bos taurus]	gi|927171193|ref|XM_005666971.2|	5268	0.0	PREDICTED: Sus scrofa PDZ and LIM domain 5 (PDLIM5), transcript variant X1, mRNA	Q8CI51	182	5e-47	PDZ and LIM domain protein 5	.	.	.	.	pfam00412	LIM	LIM domain. This family represents two copies of the LIM structural domain.	GO:0061049|cell growth involved in cardiac muscle cell development;GO:0061001|regulation of dendritic spine morphogenesis;GO:0051963|regulation of synapse assembly;	GO:0015629|actin cytoskeleton;GO:0005913|cell-cell adherens junction;GO:0005829|cytosol;GO:0016020|membrane;GO:0043005|neuron projection;GO:0014069|postsynaptic density;GO:0045211|postsynaptic membrane;	GO:0003779|actin binding;GO:0042805|actinin binding;GO:0098641|cadherin binding involved in cell-cell adhesion;GO:0005080|protein kinase C binding;GO:0008270|zinc ion binding;	.	.
ENSSSCG00000009193	1.6231534708087068	1.4712803350280914	1.2127105278957726	1.182981091705168	1.2336374801954515	1.116009447215189	SMARCAD1	protein_coding	chr8:125409490-125488481:-	gi|545846699|ref|XP_005667041.1|	5183	0.0	PREDICTED: SWI/SNF-related matrix-associated actin-dependent regulator of chromatin subfamily A containing DEAD/H box 1 [Sus scrofa]	gi|927171231|ref|XM_005666985.2|	4558	0.0	PREDICTED: Sus scrofa SWI/SNF-related, matrix-associated actin-dependent regulator of chromatin, subfamily a, containing DEAD/H box 1 (SMARCAD1), transcript variant X2, mRNA	E1B7X9	1940	0.0	SWI/SNF-related matrix-associated actin-dependent regulator of chromatin subfamily A containing DEAD/H box 1	.	.	.	.	pfam00176	SNF2_N	SNF2 family N-terminal domain. This domain is found in proteins involved in a variety of processes including transcription regulation (e.g., SNF2, STH1, brahma, MOT1), DNA repair (e.g., ERCC6, RAD16, RAD5), DNA recombination (e.g., RAD54), and chromatin unwinding (e.g., ISWI) as well as a variety of other proteins with little functional information (e.g., lodestar, ETL1).	GO:0043044|ATP-dependent chromatin remodeling;GO:0006325|chromatin organization;GO:0006338|chromatin remodeling;GO:0051304|chromosome separation;GO:0000729|DNA double-strand break processing;GO:0070932|histone H3 deacetylation;GO:0070933|histone H4 deacetylation;GO:0009117|nucleotide metabolic process;GO:0045893|positive regulation of transcription, DNA-templated;GO:0051260|protein homooligomeriz…	GO:0000792|heterochromatin;GO:0016363|nuclear matrix;GO:0043596|nuclear replication fork;GO:0005654|nucleoplasm;GO:0035861|site of double-strand break;	GO:0005524|ATP binding;GO:0003677|DNA binding;GO:0004386|helicase activity;GO:0003676|nucleic acid binding;	K14439	SMARCAD1; SWI/SNF-related matrix-associated actin-dependent regulator of chromatin subfamily A containing DEAD/H box 1 [EC:3.6.4.12]
ENSSSCG00000002366	16.30183976071232	18.94481283526324	14.217314839774307	9.791637107147164	13.130869149203077	10.133127376636002	NPC2	protein_coding	chr7:97730516-97740331:-	gi|47523496|ref|NP_999371.1|	695	4e-86	epididymal secretory protein E1 precursor [Sus scrofa]	gi|288783868|dbj|AK345483.1|	1409	0.0	Sus scrofa mRNA, clone:LNG010035G07, expressed in lung	O97763	272	1e-87	Epididymal secretory protein E1	.	.	.	.	pfam02221	E1_DerP2_DerF2	ML domain. ML domain - MD-2-related lipid recognition domain. This family consists of proteins from plants, animals and fungi, including dust mite allergen Der P 2. It has been implicate in lipid recognition, particularly in the recognition of pathogen related products. A mutation in Npc2 causes a rare form of Niemann-Pick type C2 disease. This domain has a similar topology to immunoglobulin doma…	GO:0033344|cholesterol efflux;GO:0042632|cholesterol homeostasis;GO:0008203|cholesterol metabolic process;GO:0030301|cholesterol transport;GO:0032367|intracellular cholesterol transport;GO:0009615|response to virus;	GO:0005783|endoplasmic reticulum;GO:0070062|extracellular exosome;GO:0005764|lysosome;	GO:0015485|cholesterol binding;	K13443	NPC2; Niemann-Pick C2 protein
ENSSSCG00000002367	4.166901447449217	5.080199882492039	5.292485945622745	4.293986908599503	5.813457074504188	3.795028784081056	ISCA2	protein_coding	chr7:97739900-97743911:+	gi|545842377|ref|XP_005656466.1|	763	1e-97	PREDICTED: iron-sulfur cluster assembly 2 homolog, mitochondrial isoform X1 [Sus scrofa]	gi|290350765|dbj|AB519261.1|	675	0.0	Sus scrofa domestica NPC2 gene for 16kDa secretory protein, complete cds	Q2TBG7	264	4e-86	Iron-sulfur cluster assembly 2 homolog, mitochondrial	SPBC3B9.17	86.3	8e-19	COG0316	pfam01521	Fe-S_biosyn	Iron-sulphur cluster biosynthesis. This family is involved in iron-sulphur cluster biosynthesis. Its members include proteins that are involved in nitrogen fixation such as the HesB and HesB-like proteins.	GO:0016226|iron-sulfur cluster assembly;GO:0097428|protein maturation by iron-sulfur cluster transfer;GO:0006790|sulfur compound metabolic process;	GO:0005739|mitochondrion;	GO:0051537|2 iron, 2 sulfur cluster binding;GO:0051539|4 iron, 4 sulfur cluster binding;GO:0008198|ferrous iron binding;GO:0005198|structural molecule activity;	.	.
ENSSSCG00000023373	0.9808741213746491	1.2055551911509426	0.8943166667256593	0.5720607301008267	0.3339988705099758	0.7984369032682195	ZNHIT3	protein_coding	chr12:38013944-38027921:+	gi|311267803|ref|XP_003131748.1|	806	6e-97	PREDICTED: zinc finger HIT domain-containing protein 3 isoform X2 [Sus scrofa]	gi|927197095|ref|XR_306538.2|	1093	0.0	PREDICTED: Sus scrofa zinc finger, HIT-type containing 3 (ZNHIT3), transcript variant X2, misc_RNA	Q15649	239	3e-76	Zinc finger HIT domain-containing protein 3	.	.	.	.	pfam04438	zf-HIT	HIT zinc finger. This presumed zinc finger contains up to 6 cysteine residues that could coordinate zinc. The domain is named after the HIT protein. This domain is also found in the Thyroid receptor interacting protein 3 (TRIP-3), which specifically interacts with the ligand binding domain of the thyroid receptor.	GO:0006355|regulation of transcription, DNA-templated;	GO:0005622|intracellular;	GO:0046872|metal ion binding;GO:0046966|thyroid hormone receptor binding;	.	.
ENSSSCG00000023371	22.143777439295004	19.8829618262106	17.00012421042803	16.699428682883166	20.328605336701163	15.359030685949891	EHD2	protein_coding	chr6:53423485-53443404:+	gi|528765339|gb|EPY84998.1|	2781	0.0	EH domain-containing protein 2, partial [Camelus ferus]	gi|300174898|emb|FP565353.11|	3120	0.0	Pig DNA sequence from clone CH242-139A20 on chromosome 6, complete sequence	Q9NZN4	1066	0.0	EH domain-containing protein 2	.	.	.	.	pfam00350	Dynamin_N	Dynamin family.	GO:0007596|blood coagulation;GO:0030866|cortical actin cytoskeleton organization;GO:0032456|endocytic recycling;GO:0006897|endocytosis;GO:0097320|membrane tubulation;GO:2001137|positive regulation of endocytic recycling;GO:1901741|positive regulation of myoblast fusion;GO:0072659|protein localization to plasma membrane;	GO:0005901|caveola;GO:0005829|cytosol;GO:0010008|endosome membrane;GO:0070062|extracellular exosome;GO:0019898|extrinsic component of membrane;GO:0005634|nucleus;GO:0048471|perinuclear region of cytoplasm;GO:0005886|plasma membrane;GO:0055038|recycling endosome membrane;	GO:0005524|ATP binding;GO:0005509|calcium ion binding;GO:0005525|GTP binding;GO:0016787|hydrolase activity;GO:0003676|nucleic acid binding;	K12469	EHD2; EH domain-containing protein 2
ENSSSCG00000023376	0.9821271877368681	0.7992802000466531	0.6733501692429756	0.4037969754196855	0.8566727425552706	0.4001806345806424	PARD6G	protein_coding	chr6:128162600-128250694:-	gi|350579750|ref|XP_003122342.2|	1669	0.0	PREDICTED: partitioning defective 6 homolog gamma [Sus scrofa]	gi|927100015|ref|XM_013993972.1|	2258	0.0	PREDICTED: Sus scrofa par-6 family cell polarity regulator gamma (PARD6G), transcript variant X1, mRNA	Q9JK84	535	0.0	Partitioning defective 6 homolog gamma	.	.	.	.	pfam00564	PB1	PB1 domain.	GO:0007049|cell cycle;GO:0051301|cell division;	GO:0005923|bicellular tight junction;GO:0005737|cytoplasm;GO:0005886|plasma membrane;GO:0043234|protein complex;	.	K06093	PARD6; partitioning defective protein 6
ENSSSCG00000023377	4.413317805996734	3.919743441013741	1.894212384384209	1.817484611257835	2.874628726787799	2.0380329430822517	EMP3	protein_coding	chr6:53757491-53763413:+	gi|530667592|gb|EQB77893.1|	663	4e-77	epithelial membrane protein 3-like protein [Camelus ferus]	gi|294345260|emb|FP565349.6|	1829	0.0	Pig DNA sequence from clone CH242-233E20 on chromosome 6, complete sequence	Q58DR6	258	3e-78	Epithelial membrane protein 3	.	.	.	.	pfam00822	PMP22_Claudin	PMP-22/EMP/MP20/Claudin family.	GO:0032060|bleb assembly;GO:0008219|cell death;GO:0016049|cell growth;	GO:0016021|integral component of membrane;GO:0005886|plasma membrane;	.	.	.
ENSSSCG00000023374	10.560643949314887	10.310669398001483	2.8184525254384414	4.436721003338798	8.505404137553821	13.473622742651202	SRGN	protein_coding	chr14:72183363-72199259:+	gi|927206477|ref|XP_013845865.1|	639	2e-78	PREDICTED: serglycin [Sus scrofa]	gi|927206476|ref|XM_013990411.1|	1175	0.0	PREDICTED: Sus scrofa serglycin (SRGN), mRNA	P10124	157	3e-44	Serglycin	.	.	.	.	pfam04360	Serglycin	Serglycin. Serglycin is the most prevalent proteoglycan produced in haemopoietic cells. Serglycin is a proteinase resistant secretory granule proteoglycan.	GO:0031214|biomineral tissue development;GO:0008626|granzyme-mediated apoptotic signaling pathway;GO:0033382|maintenance of granzyme B location in T cell secretory granule;GO:0033373|maintenance of protease location in mast cell secretory granule;GO:0033364|mast cell secretory granule organization;GO:0030502|negative regulation of bone mineralization;GO:0050710|negative regulation of cytokine sec…	GO:0005576|extracellular region;GO:0005615|extracellular space;GO:0005794|Golgi apparatus;GO:0000139|Golgi membrane;GO:0042629|mast cell granule;GO:0031093|platelet alpha granule lumen;GO:0042588|zymogen granule;	.	K06849	PGSG; proteoglycan peptide core protein
ENSSSCG00000023378	1.2049903920420342	1.1983100325071756	1.6737736619996408	0.8759864037782354	1.250202603612478	0.8621124518746384	ZNF316	protein_coding	chr3:4555440-4569343:-	gi|821391620|ref|XP_012388070.1|	3494	0.0	PREDICTED: zinc finger protein 316 [Orcinus orca]	gi|927114699|ref|XM_005653060.2|	2539	0.0	PREDICTED: Sus scrofa zinc finger protein 316 (ZNF316), mRNA	A6NFI3	1246	0.0	Zinc finger protein 316	.	.	.	.	pfam01352	KRAB	KRAB box. The KRAB domain (or Kruppel-associated box) is present in about a third of zinc finger proteins containing C2H2 fingers. The KRAB domain is found to be involved in protein-protein interactions. The KRAB domain is generally encoded by two exons. The regions coded by the two exons are known as KRAB-A and KRAB-B. The A box plays an important role in repression by binding to corepressors, w…	GO:0006355|regulation of transcription, DNA-templated;GO:0006351|transcription, DNA-templated;	GO:0005634|nucleus;	GO:0003677|DNA binding;GO:0046872|metal ion binding;	K09228	KRAB; KRAB domain-containing zinc finger protein
ENSSSCG00000023379	5.2917789987873265	4.611776021508122	2.9512355784008837	2.643509538877546	2.949810625378725	4.964364721726943	UBE2L6	protein_coding	chr2:13353854-13369332:+	gi|350539097|ref|NP_001233144.1|	806	3e-102	ubiquitin/ISG15-conjugating enzyme E2 L6 [Sus scrofa]	gi|115554262|dbj|AK240057.1|	1370	0.0	Sus scrofa mRNA, clone:UTR010026A05, expressed in uterus	A5PJC4	256	4e-81	Ubiquitin/ISG15-conjugating enzyme E2 L6	YDR059c	106	9e-26	COG5078	pfam00179	UQ_con	Ubiquitin-conjugating enzyme. Proteins destined for proteasome-mediated degradation may be ubiquitinated. Ubiquitination follows conjugation of ubiquitin to a conserved cysteine residue of UBC homologues. TSG101 is one of several UBC homologues that lacks this active site cysteine.	GO:0032020|ISG15-protein conjugation;GO:0019941|modification-dependent protein catabolic process;GO:0016567|protein ubiquitination;	.	GO:0005524|ATP binding;GO:0042296|ISG15 transferase activity;	K04553	UBE2L6, UBCH8; ubiquitin-conjugating enzyme E2 L6 [EC:2.3.2.23]
ENSSSCG00000011698	117.25136175865293	142.04565920652527	127.70615181397955	96.01586818778347	89.93213479826785	93.76233557050972	GYG1	protein_coding	chr13:89221086-89259697:+	gi|602722450|ref|XP_007471371.1|	1804	0.0	PREDICTED: glycogenin-1 isoform X1 [Lipotes vexillifer]	gi|371916044|dbj|AK389979.1|	1832	0.0	Sus scrofa mRNA, clone: BFLT10013C06, expressed in brain (frontal lobe)	P13280	644	0.0	Glycogenin-1	.	.	.	.	pfam01501	Glyco_transf_8	Glycosyl transferase family 8. This family includes enzymes that transfer sugar residues to donor molecules. Members of this family are involved in lipopolysaccharide biosynthesis and glycogen synthesis. This family includes Lipopolysaccharide galactosyltransferase, lipopolysaccharide glucosyltransferase 1, and glycogenin glucosyltransferase.	GO:0005978|glycogen biosynthetic process;GO:0005980|glycogen catabolic process;	GO:0005829|cytosol;GO:0070062|extracellular exosome;GO:0043202|lysosomal lumen;GO:0016020|membrane;	GO:0008466|glycogenin glucosyltransferase activity;GO:0046872|metal ion binding;	K00750	GYG1, GYG2; glycogenin glucosyltransferase [EC:2.4.1.186]
ENSSSCG00000011699	1.9798080239305365	2.355578478171969	1.6467001383190243	0.936200233083238	1.0268853071198951	0.7820766754239773	HPS3	protein_coding	chr13:89360025-89413607:+	gi|148747358|ref|NP_001092058.1|	5291	0.0	Hermansky-Pudlak syndrome 3 protein [Sus scrofa]	gi|927201069|ref|XM_013991440.1|	3775	0.0	PREDICTED: Sus scrofa Hermansky-Pudlak syndrome 3 (HPS3), transcript variant X1, mRNA	Q969F9	1564	0.0	Hermansky-Pudlak syndrome 3 protein	.	.	.	.	pfam14763	HPS3_C	Hermansky-Pudlak syndrome 3, C-terminal. This domain is downstream of the mid domain family, pfam14762, of these vertebrate proteins. This region carries a number of tyrosine sorting motifs and the second of two di-leucine sorting boxes at residues 711-717 well as the ER membrane-retention signal KKPL at residues 1000-1003 in human Hermansky-Pudlak syndrome 3 protein. There is also reference to a…	GO:0006996|organelle organization;GO:0043473|pigmentation;	GO:0031084|BLOC-2 complex;	.	.	.
ENSSSCG00000011690	2.8961633817988615	3.2928496664651408	1.63258083957976	1.6596919457184804	2.754096247616053	1.5856881277416393	PLSCR4	protein_coding	chr13:86542284-86574156:-	gi|311269500|ref|XP_003132512.1|	1485	0.0	PREDICTED: phospholipid scramblase 4 isoform X1 [Sus scrofa]	gi|927201047|ref|XM_003132464.4|	3226	0.0	PREDICTED: Sus scrofa phospholipid scramblase 4 (PLSCR4), transcript variant X1, mRNA	Q9NRQ2	463	1e-152	Phospholipid scramblase 4	.	.	.	.	pfam03803	Scramblase	Scramblase. Scramblase is palmitoylated and contains a potential protein kinase C phosphorylation site. Scramblase exhibits Ca2+-activated phospholipid scrambling activity in vitro. There are also possible SH3 and WW binding motifs. Scramblase is involved in the redistribution of phospholipids after cell activation or injury.	GO:0071222|cellular response to lipopolysaccharide;GO:0017121|phospholipid scrambling;	GO:0070062|extracellular exosome;GO:0016021|integral component of membrane;GO:0005886|plasma membrane;	GO:0005509|calcium ion binding;GO:0042609|CD4 receptor binding;GO:0019899|enzyme binding;GO:0017128|phospholipid scramblase activity;	.	.
ENSSSCG00000011692	4.288833155485283	4.340157564024678	3.577193198459327	2.892853562043474	2.797513353929249	4.933362480736773	ZIC1	protein_coding	chr13:87745751-87752919:+	gi|403265817|ref|XP_003925109.1|	1818	0.0	PREDICTED: zinc finger protein ZIC 1 [Saimiri boliviensis boliviensis]	gi|731499736|ref|XM_003416166.2|	2495	0.0	PREDICTED: Loxodonta africana Zic family member 1 (ZIC1), mRNA	Q15915	699	0.0	Zinc finger protein ZIC 1	.	.	.	.	pfam13465	zf-H2C2_2	Zinc-finger double domain.	GO:0007628|adult walking behavior;GO:0007420|brain development;GO:0030154|cell differentiation;GO:0042472|inner ear morphogenesis;GO:0007389|pattern specification process;GO:0042307|positive regulation of protein import into nucleus;GO:0045893|positive regulation of transcription, DNA-templated;GO:0008589|regulation of smoothened signaling pathway;GO:0021510|spinal cord development;	GO:0005737|cytoplasm;GO:0005654|nucleoplasm;GO:0005634|nucleus;	GO:0046872|metal ion binding;GO:0000978|RNA polymerase II core promoter proximal region sequence-specific DNA binding;GO:0003700|transcription factor activity, sequence-specific DNA binding;GO:0001077|transcriptional activator activity, RNA polymerase II core promoter proximal region sequence-specific binding;	K09224	ZIC1; zinc finger protein ZIC 1
ENSSSCG00000011693	1.425311716479724	1.0820019069967148	1.2312380498497357	1.3312730556893326	2.2493765623142457	2.555918006713646	ZIC4	protein_coding	chr13:87722067-87738444:-	gi|545864328|ref|XP_005654085.1|	1520	0.0	PREDICTED: LOW QUALITY PROTEIN: zinc finger protein ZIC 4 [Sus scrofa]	gi|927201061|ref|XM_005654028.2|	3796	0.0	PREDICTED: Sus scrofa Zic family member 4 (ZIC4), mRNA	Q61467	502	3e-160	Zinc finger protein ZIC 4	SPAC144.09c	102	5e-22	COG5048	pfam13465	zf-H2C2_2	Zinc-finger double domain.	.	GO:0005634|nucleus;	GO:0003677|DNA binding;GO:0046872|metal ion binding;	K09225	ZIC4; zinc finger protein ZIC 4
ENSSSCG00000011694	0.039805595382486736	0.0	0.0	0.0	0.1142430574164988	0.0	CPB1	protein_coding	chr13:89044298-89088594:+	gi|927201081|ref|XP_013847353.1|	2182	0.0	PREDICTED: carboxypeptidase B-like [Sus scrofa]	gi|927201080|ref|XM_013991899.1|	1427	0.0	PREDICTED: Sus scrofa carboxypeptidase B-like (LOC102165541), mRNA	P09955	842	0.0	Carboxypeptidase B	SPBC337.07c	169	4e-45	COG2866	pfam00246	Peptidase_M14	Zinc carboxypeptidase.	.	GO:0005615|extracellular space;	GO:0004181|metallocarboxypeptidase activity;GO:0008270|zinc ion binding;	K01291	CPB1; carboxypeptidase B [EC:3.4.17.2]
ENSSSCG00000011695	8.191002278232892	10.367321427660833	7.518566079555783	7.699344149888959	12.607102839906242	12.376868754645406	AGTR1	protein_coding	chr13:88934985-88980310:+	gi|311269507|ref|XP_003132517.1|	1592	0.0	PREDICTED: type-1 angiotensin II receptor [Sus scrofa]	gi|217669|dbj|D11340.1|PIGA2R	2329	0.0	Sus sp. mRNA for angiotensin II receptor, complete cds	P30555	617	0.0	Type-1 angiotensin II receptor	.	.	.	.	pfam00001	7tm_1	7 transmembrane receptor (rhodopsin family). This family contains, amongst other G-protein-coupled receptors (GCPRs), members of the opsin family, which have been considered to be typical members of the rhodopsin superfamily. They share several motifs, mainly the seven transmembrane helices, GCPRs of the rhodopsin superfamily. All opsins bind a chromophore, such as 11-cis-retinal. The function of…	GO:0019722|calcium-mediated signaling;GO:0060326|cell chemotaxis;GO:0001822|kidney development;GO:0032270|positive regulation of cellular protein metabolic process;GO:0010873|positive regulation of cholesterol esterification;GO:0051482|positive regulation of cytosolic calcium ion concentration involved in phospholipase C-activating G-protein coupled signaling pathway;GO:0032430|positive regulatio…	GO:0016021|integral component of membrane;GO:0005622|intracellular;GO:0005886|plasma membrane;	GO:0001596|angiotensin type I receptor activity;GO:0004945|angiotensin type II receptor activity;	K04166	AGTR1; angiotensin II receptor type 1
ENSSSCG00000020663	5.75557276637855	5.835097178990759	4.70762488810791	3.528299954326223	4.227631353781497	4.562908277308195	KMT2C	protein_coding	chr18:4993204-5277722:+	gi|955517640|ref|XP_014643087.1|	19448	0.0	PREDICTED: histone-lysine N-methyltransferase 2C [Ceratotherium simum simum]	gi|927215976|ref|XM_013983497.1|	10239	0.0	PREDICTED: Sus scrofa histone-lysine N-methyltransferase 2C (LOC100514805), transcript variant X1, mRNA	Q8NEZ4	64.7	3e-08	Histone-lysine N-methyltransferase 2C	SPCC306.04c	139	1e-31	COG2940	pfam00856	SET	SET domain. SET domains are protein lysine methyltransferase enzymes. SET domains appear to be protein-protein interaction domains. It has been demonstrated that SET domains mediate interactions with a family of proteins that display similarity with dual-specificity phosphatases (dsPTPases). A subset of SET domains have been called PR domains. These domains are divergent in sequence from other SE…	GO:0006355|regulation of transcription, DNA-templated;GO:0006351|transcription, DNA-templated;	GO:0035097|histone methyltransferase complex;GO:0044666|MLL3/4 complex;GO:0005654|nucleoplasm;GO:0005634|nucleus;	GO:0003677|DNA binding;GO:0042800|histone methyltransferase activity (H3-K4 specific);GO:0018024|histone-lysine N-methyltransferase activity;GO:0044822|poly(A) RNA binding;GO:0016746|transferase activity, transferring acyl groups;GO:0008270|zinc ion binding;	K09188	MLL3; histone-lysine N-methyltransferase MLL3 [EC:2.1.1.43]
ENSSSCG00000020665	0.9171209176124945	1.1667493718781967	0.9935555741396129	0.8492130995210522	1.2917081691892132	0.9176238612923159	TAF6L	protein_coding	chr2:8983824-9000696:-	gi|927101547|ref|XP_013849654.1|	2559	0.0	PREDICTED: LOW QUALITY PROTEIN: TAF6-like RNA polymerase II p300/CBP-associated factor-associated factor 65 kDa subunit 6L [Sus scrofa]	gi|371911506|dbj|AK396835.1|	1973	0.0	Sus scrofa mRNA, clone: PST010099E03, expressed in prostate	Q8R2K4	914	0.0	TAF6-like RNA polymerase II p300/CBP-associated factor-associated factor 65 kDa subunit 6L	SPCC16C4.18c	134	9e-32	COG5095	pfam07571	DUF1546	Protein of unknown function (DUF1546). Associated with pfam02969 in Transcription initiation factor TFIID subunit 6 (TAF6).	GO:0006352|DNA-templated transcription, initiation;GO:0043966|histone H3 acetylation;GO:0051090|regulation of sequence-specific DNA binding transcription factor activity;	GO:0070062|extracellular exosome;GO:0030914|STAGA complex;	GO:0003713|transcription coactivator activity;	K03131	TAF6; transcription initiation factor TFIID subunit 6
ENSSSCG00000020666	3.3253195863181007	3.9660267911404623	1.9608075112857257	2.406738935163897	4.233509899513376	2.8585869145434266	EHD4	protein_coding	chr1:129374547-129460222:+	gi|586531235|ref|XP_006920525.1|	2623	0.0	PREDICTED: EH domain-containing protein 4 [Pteropus alecto]	gi|927096478|ref|XM_013993134.1|	4497	0.0	PREDICTED: Sus scrofa EH domain-containing protein 4 (LOC100738234), partial mRNA	Q9H223	1006	0.0	EH domain-containing protein 4	.	.	.	.	pfam00350	Dynamin_N	Dynamin family.	GO:0071363|cellular response to growth factor stimulus;GO:0032456|endocytic recycling;GO:0006907|pinocytosis;GO:0050731|positive regulation of peptidyl-tyrosine phosphorylation;GO:0051260|protein homooligomerization;GO:0030100|regulation of endocytosis;	GO:0005913|cell-cell adherens junction;GO:0031901|early endosome membrane;GO:0005783|endoplasmic reticulum;GO:0070062|extracellular exosome;GO:0016020|membrane;GO:0005634|nucleus;GO:0048471|perinuclear region of cytoplasm;GO:0005886|plasma membrane;GO:0055038|recycling endosome membrane;	GO:0005524|ATP binding;GO:0098641|cadherin binding involved in cell-cell adhesion;GO:0005509|calcium ion binding;GO:0005525|GTP binding;GO:0003676|nucleic acid binding;	K12477	EHD4; EH domain-containing protein 4
ENSSSCG00000033082	7.108702982769057	7.308490706040343	5.938598104341277	4.95379269900104	6.1997248961741365	5.313456753441448	HGS	protein_coding	chr12:1205161-1220048:-	gi|470595830|ref|XP_004310801.1|	2963	0.0	PREDICTED: hepatocyte growth factor-regulated tyrosine kinase substrate [Tursiops truncatus]	gi|371923926|dbj|AK396543.1|	2839	0.0	Sus scrofa mRNA, clone: PST010049F12, expressed in prostate	Q0V8S0	67.0	2e-20	Hepatocyte growth factor-regulated tyrosine kinase substrate	.	.	.	.	pfam00790	VHS	VHS domain. Domain present in VPS-27, Hrs and STAM.	GO:0010324|membrane invagination;GO:0046426|negative regulation of JAK-STAT cascade;GO:1903543|positive regulation of exosomal secretion;GO:0010628|positive regulation of gene expression;GO:0072657|protein localization to membrane;GO:0006622|protein targeting to lysosome;GO:0043405|regulation of MAP kinase activity;	GO:0031901|early endosome membrane;GO:0070062|extracellular exosome;GO:0032585|multivesicular body membrane;	GO:0046872|metal ion binding;	K12182	HGS, HRS, VPS27; hepatocyte growth factor-regulated tyrosine kinase substrate
ENSSSCG00000023746	0.0	0.020344519918424404	0.0	0.0	0.020398566292708177	0.0	ENSSSCG00000023746	protein_coding	chr15:10654760-11068576:+	gi|965902434|ref|XP_014945430.1|	9607	0.0	PREDICTED: low-density lipoprotein receptor-related protein 1B isoform X4 [Ovis aries musimon]	gi|965902433|ref|XM_015089944.1|	4550	0.0	PREDICTED: Ovis aries musimon LDL receptor related protein 1B (LRP1B), transcript variant X4, mRNA	Q9NZR2	103	3e-20	Low-density lipoprotein receptor-related protein 1B	.	.	.	.	pfam00057	Ldl_recept_a	Low-density lipoprotein receptor domain class A.	GO:0015031|protein transport;GO:0006898|receptor-mediated endocytosis;	GO:0016021|integral component of membrane;GO:0043235|receptor complex;	GO:0005509|calcium ion binding;	.	.
ENSSSCG00000025266	0.01711712956463205	0.11432500215389856	0.04603954276249337	0.0	0.0	0.01580909215118196	VWA3A	protein_coding	chr3:24036351-24097393:-	gi|602729279|ref|XP_007450067.1|	4961	0.0	PREDICTED: von Willebrand factor A domain-containing protein 3A-like, partial [Lipotes vexillifer]	gi|115546552|dbj|AK234390.1|	2435	0.0	Sus scrofa mRNA, clone:OVR010053E10, expressed in ovary	A6NCI4	1788	0.0	von Willebrand factor A domain-containing protein 3A	.	.	.	.	pfam13768	VWA_3	von Willebrand factor type A domain.	.	GO:0005576|extracellular region;	.	.	.
ENSSSCG00000025965	0.288481689073952	0.2064390043582354	0.17781556080980868	0.13571479728484379	0.2932321801959586	0.08326150693955378	SPDL1	protein_coding	chr16:54254227-54303544:-	gi|335304115|ref|XP_003134111.2|	2791	0.0	PREDICTED: protein Spindly [Sus scrofa]	gi|927213125|ref|XM_003134063.4|	2496	0.0	PREDICTED: Sus scrofa protein Spindly (LOC100510938), transcript variant X1, mRNA	Q96EA4	857	0.0	Protein Spindly	.	.	.	.	pfam01576	Myosin_tail_1	Myosin tail. The myosin molecule is a multi-subunit complex made up of two heavy chains and four light chains it is a fundamental contractile protein found in all eukaryote cell types. This family consists of the coiled-coil myosin heavy chain tail region. The coiled-coil is composed of the tail from two molecules of myosin. These can then assemble into the macromolecular thick filament. The coil…	GO:0051301|cell division;GO:0000132|establishment of mitotic spindle orientation;GO:0007080|mitotic metaphase plate congression;GO:0034501|protein localization to kinetochore;GO:0007062|sister chromatid cohesion;GO:0031577|spindle checkpoint;	GO:0000940|condensed chromosome outer kinetochore;GO:0005829|cytosol;GO:0005815|microtubule organizing center;GO:0005634|nucleus;GO:0000922|spindle pole;	GO:0019899|enzyme binding;GO:0043515|kinetochore binding;	.	.
ENSSSCG00000031037	0.8650664823280582	0.16507895886564053	0.0	0.1860417318610382	0.16551750050894315	1.5979216239947962	ENSSSCG00000031037	protein_coding	chr14:48841940-48842417:+	gi|343183368|ref|NP_001230248.1|	539	7e-67	immunoglobulin lambda-like polypeptide 5 precursor [Sus scrofa]	gi|288786287|dbj|AK346895.1|	344	6e-179	Sus scrofa mRNA, clone:MLN010071C12, expressed in mesenteric lymph nodes	P04211	134	2e-39	Immunoglobulin lambda variable 7-43	.	.	.	.	pfam07686	V-set	Immunoglobulin V-set domain. This domain is found in antibodies as well as neural protein P0 and CTL4 amongst others.	GO:0006956|complement activation;GO:0006958|complement activation, classical pathway;GO:0038095|Fc-epsilon receptor signaling pathway;GO:0038096|Fc-gamma receptor signaling pathway involved in phagocytosis;GO:0006955|immune response;GO:0006898|receptor-mediated endocytosis;GO:0050776|regulation of immune response;	GO:0005576|extracellular region;GO:0005886|plasma membrane;	GO:0003823|antigen binding;GO:0004252|serine-type endopeptidase activity;	.	.
ENSSSCG00000025210	2.2751012772289965	1.8851387373457753	1.6908555234993647	0.740364984694949	1.2028206372134915	1.244158321679872	ATG10	protein_coding	chr2:90437020-90665380:+	gi|545811675|ref|XP_005661585.1|	1193	1e-156	PREDICTED: ubiquitin-like-conjugating enzyme ATG10 isoform X1 [Sus scrofa]	gi|927105331|ref|XM_005661528.2|	2195	0.0	PREDICTED: Sus scrofa autophagy related 10 (ATG10), transcript variant X1, mRNA	Q9H0Y0	389	3e-129	Ubiquitin-like-conjugating enzyme ATG10	.	.	.	.	pfam03987	Autophagy_act_C	Autophagocytosis associated protein, active-site domain. Autophagocytosis is a starvation-induced process responsible for transport of cytoplasmic proteins to the vacuole. The cysteine residue within the HPC motif is the putative active-site residue for recognition of the Apg5 subunit of the autophagosome complex.	GO:0006914|autophagy;GO:0034263|autophagy in response to ER overload;GO:0016236|macroautophagy;GO:0031401|positive regulation of protein modification process;GO:0006497|protein lipidation;GO:0032446|protein modification by small protein conjugation;GO:0015031|protein transport;	GO:0005829|cytosol;GO:0005622|intracellular;	GO:0019777|Atg12 transferase activity;GO:0016874|ligase activity;	K17888	ATG10L, ATG10; ubiquitin-like-conjugating enzyme ATG10, animal type
ENSSSCG00000031033	0.3529749180904848	0.2525906960956187	0.474694187893874	0.0	0.0	0.08150042017965425	FAM133A	protein_coding	chrX:76179082-76179828:+	gi|311276644|ref|XP_003135294.1|	409	3e-45	PREDICTED: protein FAM133A [Sus scrofa]	gi|927219294|ref|XM_003135246.3|	747	0.0	PREDICTED: Sus scrofa family with sequence similarity 133, member A (FAM133A), transcript variant X8, mRNA	Q8N9E0	142	3e-39	Protein FAM133A	.	.	.	.	pfam08748	DUF1789	Domain of unknown function (DUF1789). Putative uncharacterized domain found in phage-related conserved hypothetical protein from Bordetella.	.	GO:0016021|integral component of membrane;GO:0005886|plasma membrane;	.	.	.
ENSSSCG00000031031	0.035125079548879945	0.0	0.057734785996506256	0.03147508873847938	0.005600547752567259	0.021627287344299015	CSMD3	protein_coding	chr4:24647837-25869003:+	gi|928151963|ref|XP_013974062.1|	18811	0.0	PREDICTED: CUB and sushi domain-containing protein 3 isoform X7 [Canis lupus familiaris]	gi|965953758|ref|XM_012183951.2|	9708	0.0	PREDICTED: Ovis aries CUB and Sushi multiple domains 3 (CSMD3), transcript variant X4, mRNA	Q7Z407	68.2	2e-09	CUB and sushi domain-containing protein 3	.	.	.	.	pfam00431	CUB	CUB domain.	.	GO:0016021|integral component of membrane;GO:0005886|plasma membrane;	.	K17495	CSMD; CUB and sushi domain-containing protein
ENSSSCG00000025744	2.072195191170496	2.9885025121993203	2.152439311459451	2.775324426886964	3.5693653365903493	2.3543714000233984	KDSR	protein_coding	chr1:158288053-158518879:+	gi|194034586|ref|XP_001925948.1|	1679	0.0	PREDICTED: 3-ketodihydrosphingosine reductase isoform X1 [Sus scrofa]	gi|927097057|ref|XM_001925913.5|	5278	0.0	PREDICTED: Sus scrofa 3-ketodihydrosphingosine reductase (KDSR), transcript variant X1, mRNA	P10415	336	1e-102	Apoptosis regulator Bcl-2	.	.	.	.	pfam00452	Bcl-2	Apoptosis regulator proteins, Bcl-2 family.	GO:0007015|actin filament organization;GO:0006915|apoptotic process;GO:0031103|axon regeneration;GO:0007409|axonogenesis;GO:0001782|B cell homeostasis;GO:0002326|B cell lineage commitment;GO:0042100|B cell proliferation;GO:0050853|B cell receptor signaling pathway;GO:0001662|behavioral fear response;GO:0001658|branching involved in ureteric bud morphogenesis;GO:0043375|CD8-positive, alpha-beta T …	GO:0005737|cytoplasm;GO:0005829|cytosol;GO:0005783|endoplasmic reticulum;GO:0005789|endoplasmic reticulum membrane;GO:0016020|membrane;GO:0005741|mitochondrial outer membrane;GO:0005739|mitochondrion;GO:0043209|myelin sheath;GO:0031965|nuclear membrane;GO:0005634|nucleus;GO:0046930|pore complex;	GO:0051434|BH3 domain binding;GO:0015267|channel activity;GO:0016248|channel inhibitor activity;GO:0002020|protease binding;GO:0046982|protein heterodimerization activity;GO:0042803|protein homodimerization activity;GO:0043565|sequence-specific DNA binding;GO:0031625|ubiquitin protein ligase binding;	K02161	BCL2; apoptosis regulator BCL-2
ENSSSCG00000010128	2.5576985719140257	3.8373237887986256	2.957343520324118	1.3656667884431364	1.9912592421410398	1.466222437430601	SEPT5	protein_coding	chr14:51252340-51261616:+	gi|311271108|ref|XP_003133058.1|	1818	0.0	PREDICTED: septin-5 isoform X1 [Sus scrofa]	gi|927206039|ref|XM_001929628.6|	1197	0.0	PREDICTED: Sus scrofa septin 5 (SEPT5), transcript variant X2, mRNA	Q0VC68	612	0.0	Septin-5	SPAC4F10.11	239	1e-67	COG5019	pfam00735	Septin	Septin. Members of this family include CDC3, CDC10, CDC11 and CDC12/Septin. Members of this family bind GTP. As regards the septins, these are polypeptides of 30-65kDa with three characteristic GTPase motifs (G-1, G-3 and G-4) that are similar to those of the Ras family. The G-4 motif is strictly conserved with a unique septin consensus of AKAD. Most septins are thought to have at least one coile…	GO:0007049|cell cycle;GO:0051301|cell division;GO:0017157|regulation of exocytosis;	GO:0005856|cytoskeleton;GO:0005886|plasma membrane;GO:0008021|synaptic vesicle;	GO:0005525|GTP binding;	K04557	SEPT5, PNUTL1, CDCREL1; septin 5
ENSSSCG00000039221	9.883257975002948	11.114957319299888	7.357492749935026	5.8722510447484115	8.02118972243531	8.812778775576701	MOB1A	protein_coding	chr3:68852464-68876704:+	gi|148666661|gb|EDK99077.1|	1178	1e-146	MOB1, Mps One Binder kinase activator-like 1B (yeast), isoform CRA_b, partial [Mus musculus]	gi|927110125|ref|XM_005662457.2|	3963	0.0	PREDICTED: Sus scrofa MOB kinase activator 1A (MOB1A), mRNA	Q3T1J9	456	7e-148	MOB kinase activator 1A	.	.	.	.	pfam03637	Mob1_phocein	Mob1/phocein family. Mob1 is an essential Saccharomyces cerevisiae protein, identified from a two-hybrid screen, that binds Mps1p, a protein kinase essential for spindle pole body duplication and mitotic checkpoint regulation. Mob1 contains no known structural motifs; however MOB1 is a member of a conserved gene family and shares sequence similarity with a nonessential yeast gene, MOB2. Mob1 is a…	GO:0035329|hippo signaling;	GO:0070062|extracellular exosome;GO:0005622|intracellular;	GO:0046872|metal ion binding;	K06685	MOB1, Mats; MOB kinase activator 1
ENSSSCG00000039220	6.277911043180765	0.998334655996969	0.0	2.2502190425097	0.0	0.9663621249873291	SNORD58	snoRNA	chr1:99047696-99047758:-	.	.	.	.	.	.	.	.	.	.	.	.	.	.	.	.	pfam09586	YfhO	Bacterial membrane protein YfhO. This protein is a conserved membrane protein. The yfhO gene is transcribed in Difco sporulation medium and the transcription is affected by the YvrGHb two-component system. Some members of this family have been annotated as glycosyl transferases of the PMT family.	.	.	.	.	.
ENSSSCG00000039227	0.0	0.0	0.0	0.0	0.0	0.13619868875660343	MC2R	protein_coding	chr6:96265764-96266657:+	gi|350585926|ref|XP_003482080.1|	1450	0.0	PREDICTED: adrenocorticotropic hormone receptor [Sus scrofa]	gi|927148233|ref|XM_013999205.1|	891	0.0	PREDICTED: Sus scrofa melanocortin 2 receptor (adrenocorticotropic hormone) (MC2R), transcript variant X2, mRNA	Q8HYN8	563	0.0	Adrenocorticotropic hormone receptor	.	.	.	.	pfam00001	7tm_1	7 transmembrane receptor (rhodopsin family). This family contains, amongst other G-protein-coupled receptors (GCPRs), members of the opsin family, which have been considered to be typical members of the rhodopsin superfamily. They share several motifs, mainly the seven transmembrane helices, GCPRs of the rhodopsin superfamily. All opsins bind a chromophore, such as 11-cis-retinal. The function of…	GO:0030819|positive regulation of cAMP biosynthetic process;	GO:0016021|integral component of membrane;GO:0005886|plasma membrane;	GO:0004978|corticotropin receptor activity;	K04200	MC2R; melanocortin 2 receptor
ENSSSCG00000039224	0.13162224575744025	0.28256870083628177	0.20651240970897852	0.07961276657325596	0.11017975136836425	0.08357530919957806	CSPG5	protein_coding	chr13:30385505-30411850:-	gi|594630847|ref|XP_007168966.1|	2081	0.0	PREDICTED: chondroitin sulfate proteoglycan 5 [Balaenoptera acutorostrata scammoni]	gi|466078424|ref|XM_004283878.1|	1448	0.0	PREDICTED: Orcinus orca chondroitin sulfate proteoglycan 5 (neuroglycan C) (CSPG5), transcript variant X1, mRNA	O95196	643	0.0	Chondroitin sulfate proteoglycan 5	.	.	.	.	pfam06566	Chon_Sulph_att	Chondroitin sulphate attachment domain. This family represents the chondroitin sulphate attachment domain of vertebrate neural transmembrane proteoglycans that contain EGF modules. Evidence has been accumulated to support the idea that neural proteoglycans are involved in various cellular events including mitogenesis, differentiation, axonal outgrowth and synaptogenesis. This domain contains seve…	GO:0030154|cell differentiation;GO:0030206|chondroitin sulfate biosynthetic process;GO:0030207|chondroitin sulfate catabolic process;GO:0030208|dermatan sulfate biosynthetic process;GO:0030203|glycosaminoglycan metabolic process;GO:0046907|intracellular transport;GO:0050804|modulation of synaptic transmission;GO:0007399|nervous system development;GO:0040008|regulation of growth;	GO:0009986|cell surface;GO:0005789|endoplasmic reticulum membrane;GO:0005576|extracellular region;GO:0005794|Golgi apparatus;GO:0005796|Golgi lumen;GO:0000139|Golgi membrane;GO:0030660|Golgi-associated vesicle membrane;GO:0016021|integral component of membrane;GO:0005887|integral component of plasma membrane;GO:0043202|lysosomal lumen;GO:0016020|membrane;	GO:0008083|growth factor activity;	K08116	CSPG5; chondroitin sulfate proteoglycan 5
ENSSSCG00000010121	9.58868142586295	9.541943409142737	8.907011775768746	8.450553917328042	8.747688845318313	9.114623221856245	UFD1	protein_coding	chr14:51112499-51133665:-	gi|359323018|ref|XP_850373.3|	1590	0.0	PREDICTED: ubiquitin fusion degradation protein 1 homolog [Canis lupus familiaris]	gi|52351261|gb|AY609693.1|	1882	0.0	Sus scrofa clone Clu_26102.scr.msk.p1.Contig2, mRNA sequence	Q92890	573	0.0	Ubiquitin fusion degradation protein 1 homolog	SPBC16A3.09c	205	5e-57	COG5140	pfam03152	UFD1	Ubiquitin fusion degradation protein UFD1. Post-translational ubiquitin-protein conjugates are recognized for degradation by the ubiquitin fusion degradation (UFD) pathway. Several proteins involved in this pathway have been identified. This family includes UFD1, a 40kD protein that is essential for vegetative cell viability. The human UFD1 gene is expressed at high levels during embryogenesis, e…	GO:0071712|ER-associated misfolded protein catabolic process;GO:0070987|error-free translesion synthesis;GO:0030970|retrograde protein transport, ER to cytosol;GO:0001501|skeletal system development;GO:0006511|ubiquitin-dependent protein catabolic process;	GO:0005829|cytosol;GO:0005654|nucleoplasm;GO:0005634|nucleus;GO:0036501|UFD1-NPL4 complex;GO:0034098|VCP-NPL4-UFD1 AAA ATPase complex;	GO:0004843|ubiquitin-specific protease activity;	K14016	UFD1; ubiquitin fusion degradation protein 1
ENSSSCG00000010122	3.4790945598944316	2.7711830268986395	2.263499749747109	2.17402059291514	3.249817453944158	1.6682271900762113	CDC45	protein_coding	chr14:51132781-51161972:+	gi|350592676|ref|XP_001929659.3|	2725	0.0	PREDICTED: cell division control protein 45 homolog isoform X2 [Sus scrofa]	gi|927206028|ref|XM_001929624.6|	1979	0.0	PREDICTED: Sus scrofa cell division cycle 45 (CDC45), transcript variant X2, mRNA	O75419	913	0.0	Cell division control protein 45 homolog	.	.	.	.	pfam02724	CDC45	CDC45-like protein. CDC45 is an essential gene required for initiation of DNA replication in S. cerevisiae, forming a complex with MCM5/CDC46. Homologues of CDC45 have been identified in human, mouse and smut fungus among others.	GO:0006260|DNA replication;GO:0000076|DNA replication checkpoint;GO:0006270|DNA replication initiation;GO:0000727|double-strand break repair via break-induced replication;GO:0000082|G1/S transition of mitotic cell cycle;GO:1902977|mitotic DNA replication preinitiation complex assembly;GO:1900087|positive regulation of G1/S transition of mitotic cell cycle;GO:0006267|pre-replicative complex assemb…	GO:0005813|centrosome;GO:0005737|cytoplasm;GO:0031261|DNA replication preinitiation complex;GO:0005656|nuclear pre-replicative complex;GO:0005654|nucleoplasm;GO:0005634|nucleus;GO:0031298|replication fork protection complex;	GO:0043138|3'-5' DNA helicase activity;GO:0003682|chromatin binding;GO:0003688|DNA replication origin binding;GO:0003697|single-stranded DNA binding;	K06628	CDC45; cell division control protein 45
ENSSSCG00000018312	0.0	0.5823618826648986	0.0	0.6563138873986625	0.0	0.5637112395759419	U6	snRNA	chr6:106859293-106859400:-	.	.	.	.	gi|687936804|emb|LL016460.1|	51	1e-16	Trichobilharzia regenti genome assembly T_regenti_v1_0_4 ,scaffold TRE_scaffold0016452	.	.	.	.	.	.	.	.	pfam12855	Ecl1	Life-span regulatory factor. This family is involved in the chronological life-span of S. cerevisiae. Over-expression leads to an extended viability of wild-type strains, indicating a role in regulation.	.	.	.	.	.
ENSSSCG00000003486	16.74310440403008	15.945090702907443	12.288748290246883	12.595935815929419	9.753857351248945	12.970768406979639	ARHGEF10L	protein_coding	chr6:76064142-76230107:+	gi|743723689|ref|XP_010955766.1|	5709	0.0	PREDICTED: rho guanine nucleotide exchange factor 10-like protein isoform X5 [Camelus bactrianus]	gi|955507547|ref|XM_014783914.1|	3344	0.0	PREDICTED: Ceratotherium simum simum Rho guanine nucleotide exchange factor 10 like (LOC101406283), transcript variant X1, mRNA	Q5R5M3	2036	0.0	Rho guanine nucleotide exchange factor 10-like protein	.	.	.	.	pfam00621	RhoGEF	RhoGEF domain. Guanine nucleotide exchange factor for Rho/Rac/Cdc42-like GTPases Also called Dbl-homologous (DH) domain. It appears that pfam00169 domains invariably occur C-terminal to RhoGEF/DH domains.	GO:0035023|regulation of Rho protein signal transduction;	GO:0005737|cytoplasm;	GO:0005089|Rho guanyl-nucleotide exchange factor activity;	K16727	ARHGEF10; Rho guanine nucleotide exchange factor 10
ENSSSCG00000014806	7.174181313750107	6.2613223159246525	5.410510866945318	5.853882893238263	6.96429188681115	6.236190921813238	ANAPC15	protein_coding	chr9:6684700-6689348:-	gi|344258257|gb|EGW14361.1|	541	1e-61	Transmembrane O-methyltransferase [Cricetulus griseus]	gi|927173447|ref|XM_013999256.1|	1225	0.0	PREDICTED: Sus scrofa transmembrane O-methyltransferase (TOMT), transcript variant X2, mRNA	D3ZQX4	117	7e-32	Anaphase-promoting complex subunit 15	.	.	.	.	pfam15243	ANAPC15	Anaphase-promoting complex subunit 15. This is a component of the anaphase promoting complex/cyclosome.	GO:0051301|cell division;GO:0007067|mitotic nuclear division;GO:0090266|regulation of mitotic cell cycle spindle assembly checkpoint;	GO:0005680|anaphase-promoting complex;	.	.	.
ENSSSCG00000014804	28.82875886944237	26.1842441103999	24.504640211643522	19.85170113238478	23.07152476606366	21.24940097375418	LAMTOR1	protein_coding	chr9:6674045-6680072:-	gi|8923579|ref|NP_060377.1|	841	3e-109	ragulator complex protein LAMTOR1 [Homo sapiens]	gi|545847388|ref|XM_003129591.2|	1162	0.0	PREDICTED: Sus scrofa late endosomal/lysosomal adaptor, MAPK and MTOR activator 1 (LAMTOR1), mRNA	Q5R766	328	9e-111	Ragulator complex protein LAMTOR1	.	.	.	.	pfam15454	LAMTOR	Late endosomal/lysosomal adaptor and MAPK and MTOR activator. LAMTOR is a family of eukaryotic proteins that have otherwise been referred to as Lipid raft adaptor protein p18, Late endosomal/lysosomal adaptor and MAPK and MTOR activator 1, and Protein associated with DRMs and endosomes. It is found to be one of three small proteins constituting the Rag complex or Ragulator that interact with each…	GO:0016049|cell growth;GO:0034613|cellular protein localization;GO:0071230|cellular response to amino acid stimulus;GO:0042632|cholesterol homeostasis;GO:0032439|endosome localization;GO:0007032|endosome organization;GO:0032418|lysosome localization;GO:0007040|lysosome organization;GO:0043410|positive regulation of MAPK cascade;GO:0032008|positive regulation of TOR signaling;GO:0010874|regulation…	GO:0070062|extracellular exosome;GO:0005794|Golgi apparatus;GO:0031902|late endosome membrane;GO:0005765|lysosomal membrane;GO:0005764|lysosome;GO:0045121|membrane raft;GO:0005886|plasma membrane;GO:0071986|Ragulator complex;	GO:0005085|guanyl-nucleotide exchange factor activity;	.	.
ENSSSCG00000014802	18.496809461177516	17.808810620582516	17.556024529888408	9.339042117026006	13.738567587631156	11.11095859961278	NUMA1	protein_coding	chr9:6591945-6662878:-	gi|545847373|ref|XP_005653721.1|	5966	0.0	PREDICTED: nuclear mitotic apparatus protein 1 isoform X1 [Sus scrofa]	gi|927173416|ref|XM_005653666.2|	7143	0.0	PREDICTED: Sus scrofa nuclear mitotic apparatus protein 1 (NUMA1), transcript variant X3, mRNA	Q14980	355	5e-97	Nuclear mitotic apparatus protein 1	.	.	.	.	pfam01576	Myosin_tail_1	Myosin tail. The myosin molecule is a multi-subunit complex made up of two heavy chains and four light chains it is a fundamental contractile protein found in all eukaryote cell types. This family consists of the coiled-coil myosin heavy chain tail region. The coiled-coil is composed of the tail from two molecules of myosin. These can then assemble into the macromolecular thick filament. The coil…	GO:0051301|cell division;GO:0000132|establishment of mitotic spindle orientation;GO:0060487|lung epithelial cell differentiation;GO:0051321|meiotic cell cycle;GO:0007067|mitotic nuclear division;GO:0006997|nucleus organization;	GO:0045177|apical part of cell;GO:0005938|cell cortex;GO:0005813|centrosome;GO:0005694|chromosome;GO:0005737|cytoplasm;GO:0005829|cytosol;GO:0030425|dendrite;GO:0070062|extracellular exosome;GO:0000139|Golgi membrane;GO:0072686|mitotic spindle;GO:0061673|mitotic spindle astral microtubule;GO:0097431|mitotic spindle pole;GO:0043025|neuronal cell body;GO:0016363|nuclear matrix;GO:0005654|nucleoplas…	GO:0005198|structural molecule activity;	K16808	NUMA1; nuclear mitotic apparatus protein 1
ENSSSCG00000014803	0.536792068024414	1.0755673858990147	0.7700250995802908	0.577214168070485	0.5648891242939582	0.5949265199433394	LRRC51	protein_coding	chr9:6666613-6673781:+	gi|530788292|ref|NP_001269043.1|	993	1e-131	leucine-rich repeat-containing protein 51 [Sus scrofa]	gi|530788293|ref|NM_001282115.1|	715	0.0	Sus scrofa leucine-rich repeat-containing protein 51 (LRRC51), transcript variant 2, mRNA	Q5EAD8	355	2e-120	Leucine-rich repeat-containing protein 51	YPL213w	53.5	2e-07	COG4886	pfam14580	LRR_9	Leucine-rich repeat.	GO:0051301|cell division;GO:0000132|establishment of mitotic spindle orientation;GO:0060487|lung epithelial cell differentiation;GO:0051321|meiotic cell cycle;GO:0007067|mitotic nuclear division;GO:0006997|nucleus organization;	GO:0045177|apical part of cell;GO:0005938|cell cortex;GO:0005813|centrosome;GO:0005694|chromosome;GO:0005737|cytoplasm;GO:0005829|cytosol;GO:0030425|dendrite;GO:0070062|extracellular exosome;GO:0000139|Golgi membrane;GO:0072686|mitotic spindle;GO:0061673|mitotic spindle astral microtubule;GO:0097431|mitotic spindle pole;GO:0043025|neuronal cell body;GO:0016363|nuclear matrix;GO:0005654|nucleoplas…	GO:0005198|structural molecule activity;	.	.
ENSSSCG00000014800	1.5425444450873176	1.4472737583232191	1.2523669399407609	0.7924913398542354	1.4019280649581585	1.187223359481313	RNF121	protein_coding	chr9:6488481-6596423:+	gi|311263391|ref|XP_003129664.1|	1574	0.0	PREDICTED: RING finger protein 121 isoform X1 [Sus scrofa]	gi|927173451|ref|XM_003129616.3|	2127	0.0	PREDICTED: Sus scrofa ring finger protein 121 (RNF121), transcript variant X1, mRNA	Q9H920	605	0.0	RING finger protein 121	.	.	.	.	pfam13639	zf-RING_2	Ring finger domain.	GO:0030968|endoplasmic reticulum unfolded protein response;GO:0030433|ER-associated ubiquitin-dependent protein catabolic process;	GO:0005789|endoplasmic reticulum membrane;GO:0000139|Golgi membrane;GO:0016021|integral component of membrane;	GO:0061630|ubiquitin protein ligase activity;GO:0008270|zinc ion binding;	K15698	RNF121; RING finger protein 121
ENSSSCG00000035489	0.47931238159761297	0.7702421226520817	0.8368460683249639	0.5154060837895352	0.6274842556607696	0.3494880245361752	C11orf74	protein_coding	chr2:24475714-24551763:-	gi|602713375|ref|XP_007466910.1|	800	3e-104	PREDICTED: uncharacterized protein C11orf74 homolog [Lipotes vexillifer]	gi|744546183|ref|XM_011000598.1|	549	0.0	PREDICTED: Camelus dromedarius chromosome unknown open reading frame, human C11orf74 (LOC105106825), mRNA	Q3ZBP0	94.7	6e-20	Uncharacterized protein C11orf74 homolog	.	.	.	.	pfam09233	Endonuc-EcoRV	Restriction endonuclease EcoRV. Members of this family of prokaryotic restriction endonucleases recognize the double-stranded sequence 5'-GATATC-3' and cleave after T-3. They catalyse the endonucleolytic cleavage of DNA to give specific double-stranded fragments with terminal 5'-phosphates.	.	GO:0005829|cytosol;GO:0010008|endosome membrane;GO:0005794|Golgi apparatus;GO:0048471|perinuclear region of cytoplasm;	.	.	.
ENSSSCG00000035488	7.0681376080566665	6.631219113636672	7.566252545176644	4.422969543480605	4.8170133472484356	5.359956896581146	WDR44	protein_coding	chrX:96950288-97027123:+	gi|744581819|ref|XP_010984159.1|	4222	0.0	PREDICTED: WD repeat-containing protein 44 [Camelus dromedarius]	gi|560973096|ref|XM_006208820.1|	3466	0.0	PREDICTED: Vicugna pacos WD repeat domain 44 (WDR44), mRNA	Q9XSC3	1612	0.0	WD repeat-containing protein 44	.	.	.	.	pfam00400	WD40	WD domain, G-beta repeat.	.	GO:0005829|cytosol;GO:0010008|endosome membrane;GO:0005794|Golgi apparatus;GO:0048471|perinuclear region of cytoplasm;	.	.	.
ENSSSCG00000012841	52.83727123647589	50.877435256940856	57.07652574936002	72.90885191417587	133.99344470143916	85.06959477656005	PNPLA2	protein_coding	chr2:513062-518182:+	gi|147743343|gb|ABQ50607.1|	2277	0.0	patatin-like phospholipase domain-containing 2 [Sus scrofa]	gi|163115794|gb|EU009401.2|	2045	0.0	Sus scrofa patatin-like phospholipase domain containing 2 (PNPLA2) mRNA, complete cds	Q2KI18	780	0.0	Patatin-like phospholipase domain-containing protein 2	.	.	.	.	pfam01734	Patatin	Patatin-like phospholipase. This family consists of various patatin glycoproteins from plants. The patatin protein accounts for up to 40% of the total soluble protein in potato tubers. Patatin is a storage protein but it also has the enzymatic activity of lipid acyl hydrolase, catalyzing the cleavage of fatty acids from membrane lipids. Members of this family have been found also in vertebrates.	GO:0055088|lipid homeostasis;GO:0010891|negative regulation of sequestering of triglyceride;GO:0010898|positive regulation of triglyceride catabolic process;GO:0019433|triglyceride catabolic process;	GO:0005737|cytoplasm;GO:0016021|integral component of membrane;GO:0005811|lipid particle;GO:0016020|membrane;GO:0005886|plasma membrane;	GO:0004806|triglyceride lipase activity;	K16816	PNPLA2, ATGL; patatin-like phospholipase domain-containing protein 2 [EC:3.1.1.3]
ENSSSCG00000013340	0.36205883142369577	1.3818196904054434	0.5445021567017967	0.13814686361261713	0.06703986643576258	0.3775387111263396	MUC15	protein_coding	chr2:33685955-33699691:+	gi|545808191|ref|XP_005654752.1|	1472	0.0	PREDICTED: mucin-15 [Sus scrofa]	gi|256096101|emb|CU468572.8|	4482	0.0	Pig DNA sequence from clone CH242-524G2 on chromosome 2, complete sequence	Q8MI01	322	6e-97	Mucin-15	.	.	.	.	pfam04547	Anoctamin	Calcium-activated chloride channel. The family carries eight putative transmembrane domains, and, although it has no similarity to other known channel proteins, it is clearly a calcium-activated ionic channel. It is expressed in various secretory epithelia, the retina and sensory neurons, and mediates receptor-activated chloride currents in diverse physiological processes.	.	GO:0005576|extracellular region;GO:0016021|integral component of membrane;GO:0005886|plasma membrane;	.	.	.
ENSSSCG00000007291	7.500072222255101	6.762206245056714	4.873543512557618	4.328383236518529	6.154814905407449	4.067194246293226	EDEM2	protein_coding	chr17:38483179-38515248:-	gi|335304730|ref|XP_003360006.1|	2844	0.0	PREDICTED: ER degradation-enhancing alpha-mannosidase-like protein 2 [Sus scrofa]	gi|927214845|ref|XM_003359958.4|	1896	0.0	PREDICTED: Sus scrofa ER degradation enhancer, mannosidase alpha-like 2 (EDEM2), mRNA	Q9BV94	984	0.0	ER degradation-enhancing alpha-mannosidase-like protein 2	.	.	.	.	pfam01532	Glyco_hydro_47	Glycosyl hydrolase family 47. Members of this family are alpha-mannosidases that catalyse the hydrolysis of the terminal 1,2-linked alpha-D-mannose residues in the oligo-mannose oligosaccharide Man(9)(GlcNAc)(2).	GO:1904380|endoplasmic reticulum mannose trimming;GO:0030968|endoplasmic reticulum unfolded protein response;GO:0030433|ER-associated ubiquitin-dependent protein catabolic process;GO:0097466|glycoprotein ERAD pathway;GO:1904382|mannose trimming involved in glycoprotein ERAD pathway;GO:0006491|N-glycan processing;GO:1904154|positive regulation of retrograde protein transport, ER to cytosol;GO:0036…	GO:0005783|endoplasmic reticulum;GO:0005788|endoplasmic reticulum lumen;GO:0044322|endoplasmic reticulum quality control compartment;GO:0016020|membrane;	GO:0004559|alpha-mannosidase activity;GO:0005509|calcium ion binding;GO:0001948|glycoprotein binding;GO:0004571|mannosyl-oligosaccharide 1,2-alpha-mannosidase activity;	K10085	EDEM2; ER degradation enhancer, mannosidase alpha-like 2
ENSSSCG00000013343	0.0	0.0	0.0	0.0	0.0	0.021301894287684302	SLC17A6	protein_coding	chr2:37096815-37137777:-	gi|311248071|ref|XP_003122959.1|	3106	0.0	PREDICTED: vesicular glutamate transporter 2 [Sus scrofa]	gi|227452601|emb|CU928035.4|	4305	0.0	Pig DNA sequence from clone CH242-451D16 on chromosome 2, complete sequence	A6QLI1	1189	0.0	Vesicular glutamate transporter 2	.	.	.	.	pfam07690	MFS_1	Major Facilitator Superfamily.	GO:0089711|L-glutamate transmembrane transport;GO:0006836|neurotransmitter transport;GO:0006814|sodium ion transport;	GO:0030054|cell junction;GO:0016021|integral component of membrane;GO:0043005|neuron projection;GO:0030672|synaptic vesicle membrane;	GO:0005313|L-glutamate transmembrane transporter activity;GO:0015293|symporter activity;	K12302	SLC17A6_7_8; MFS transporter, ACS family, solute carrier family 17 (sodium-dependent inorganic phosphate cotransporter), member 6/7/8
ENSSSCG00000013344	39.34363641073861	54.83222185972976	44.50642279191728	31.810282639379224	22.664645764634752	25.30456096456595	ANO5	protein_coding	chr2:37171401-37255489:-	gi|927102679|ref|XP_005661129.2|	5367	0.0	PREDICTED: anoctamin-5 isoform X1 [Sus scrofa]	gi|927102678|ref|XM_005661072.2|	5107	0.0	PREDICTED: Sus scrofa anoctamin 5 (ANO5), transcript variant X1, mRNA	Q75V66	171	1e-41	Anoctamin-5	.	.	.	.	pfam04547	Anoctamin	Calcium-activated chloride channel. The family carries eight putative transmembrane domains, and, although it has no similarity to other known channel proteins, it is clearly a calcium-activated ionic channel. It is expressed in various secretory epithelia, the retina and sensory neurons, and mediates receptor-activated chloride currents in diverse physiological processes.	GO:0006821|chloride transport;GO:0034220|ion transmembrane transport;	GO:0005789|endoplasmic reticulum membrane;GO:0016021|integral component of membrane;GO:0005622|intracellular;GO:0005886|plasma membrane;GO:0031982|vesicle;	GO:0005229|intracellular calcium activated chloride channel activity;	K19480	ANO5, GDD1, TMEM16E; anoctamin-5
ENSSSCG00000013347	4.818899755178707	4.384050350969349	3.3759617932636075	4.217726103990046	5.296278619651518	3.953837283227654	PRMT3	protein_coding	chr2:38888028-39032739:-	gi|744586768|ref|XP_010985780.1|	2465	0.0	PREDICTED: protein arginine N-methyltransferase 3 [Camelus dromedarius]	gi|593769187|ref|XM_007122975.1|	1822	0.0	PREDICTED: Physeter catodon protein arginine methyltransferase 3 (PRMT3), transcript variant X1, mRNA	O60678	91.3	3e-18	Protein arginine N-methyltransferase 3	.	.	.	.	pfam06325	PrmA	Ribosomal protein L11 methyltransferase (PrmA). This family consists of several Ribosomal protein L11 methyltransferase (EC:2.1.1.-) sequences.	GO:0031397|negative regulation of protein ubiquitination;GO:0006355|regulation of transcription, DNA-templated;	GO:0005737|cytoplasm;GO:0005829|cytosol;GO:0005840|ribosome;	GO:0008469|histone-arginine N-methyltransferase activity;GO:0046872|metal ion binding;GO:0008168|methyltransferase activity;GO:0016274|protein-arginine N-methyltransferase activity;GO:0035242|protein-arginine omega-N asymmetric methyltransferase activity;	K11436	PRMT3; protein arginine N-methyltransferase 3 [EC:2.1.1.-]
ENSSSCG00000012843	1.0935550783674954	0.9578799745328547	0.9804364998531484	0.8289153367091077	0.7717697977225537	0.3642583370226919	PIDD1	protein_coding	chr2:498859-504942:-	gi|545805573|ref|XP_005652833.1|	3839	0.0	PREDICTED: p53-induced death domain-containing protein 1 isoform X1 [Sus scrofa]	gi|927100687|ref|XM_013989781.1|	3213	0.0	PREDICTED: Sus scrofa p53-induced death domain protein 1 (PIDD1), transcript variant X2, mRNA	Q9HB75	1271	0.0	p53-induced death domain-containing protein 1	alr0124_1	68.2	7e-11	COG4886	pfam10461	Peptidase_S68	Peptidase S68. This family of serine peptidases contains PIDD proteins. PIDD forms a complex with RAIDD and procaspase-2 that is known as the 'PIDDosome'. The PIDDosome forms when DNA damage occurs and either activates NF-kappaB, leading to cell survival, or caspase-2, which leads to apoptosis.	GO:0006919|activation of cysteine-type endopeptidase activity involved in apoptotic process;GO:0006915|apoptotic process;GO:0006974|cellular response to DNA damage stimulus;GO:0006977|DNA damage response, signal transduction by p53 class mediator resulting in cell cycle arrest;GO:0043066|negative regulation of apoptotic process;GO:0043065|positive regulation of apoptotic process;GO:1902043|positi…	GO:0005737|cytoplasm;GO:0005829|cytosol;GO:0005794|Golgi apparatus;GO:0005654|nucleoplasm;GO:0005634|nucleus;	GO:0005123|death receptor binding;	K10130	LRDD, PIDD; leucine-rich repeats and death domain-containing protein
ENSSSCG00000034286	0.22120156360200682	0.3734091162982984	0.33561883857545716	0.05489047483664602	0.2116180123956622	0.03143046663613925	ENSSSCG00000034286	protein_coding	chr8:4413020-4447764:-	gi|927165213|ref|XP_013833978.1|	1828	0.0	PREDICTED: high mobility group protein 20A-like [Sus scrofa]	gi|927165212|ref|XM_013978524.1|	1646	0.0	PREDICTED: Sus scrofa high mobility group protein 20A-like (LOC102165510), mRNA	Q5ZKF4	110	3e-24	High mobility group protein 20A	YBR089c-a	55.1	9e-08	COG5648	pfam00505	HMG_box	HMG (high mobility group) box.	GO:0006355|regulation of transcription, DNA-templated;GO:0006351|transcription, DNA-templated;	GO:0005634|nucleus;	GO:0003677|DNA binding;	.	.
ENSSSCG00000034287	0.0	0.35533945382942966	0.0	0.0	0.0	0.0	ENSSSCG00000034287	protein_coding	chr2:13736740-13736916:-	gi|350580094|ref|XP_003480749.1|	303	5e-32	PREDICTED: olfactory receptor 5AK2-like [Sus scrofa]	gi|927101944|ref|XM_003480701.2|	174	8e-85	PREDICTED: Sus scrofa olfactory receptor 5AK2-like (LOC100739746), mRNA	Q8NH89	70.9	4e-15	Putative olfactory receptor 5AK3	.	.	.	.	pfam04893	Yip1	Yip1 domain. The Yip1 integral membrane domain contains four transmembrane alpha helices. The domain is characterized by the motifs DLYGP and GY. The Yip1 protein is a golgi protein involved in vesicular transport that interacts with GTPases.	GO:0007186|G-protein coupled receptor signaling pathway;	GO:0016021|integral component of membrane;GO:0005886|plasma membrane;	GO:0004930|G-protein coupled receptor activity;GO:0005549|odorant binding;GO:0004984|olfactory receptor activity;	.	.
ENSSSCG00000034284	0.8831254586837969	1.433721155642918	0.28362052258086295	0.1700825431051123	0.2395883195729333	0.6817287696371319	ENSSSCG00000034284	protein_coding	chr6:58941108-58952131:+	gi|927143151|ref|XP_013854228.1|	1516	0.0	PREDICTED: leukocyte-associated immunoglobulin-like receptor 1 isoform X3 [Sus scrofa]	gi|118200169|emb|CU179653.3|	3571	0.0	Pig DNA sequence from clone PigE-143B24 on chromosome 6, complete sequence	Q6GTX8	230	2e-65	Leukocyte-associated immunoglobulin-like receptor 1	.	.	.	.	pfam13895	Ig_2	Immunoglobulin domain. This domain contains immunoglobulin-like domains.	GO:0002250|adaptive immune response;GO:0050776|regulation of immune response;	GO:0070062|extracellular exosome;GO:0016021|integral component of membrane;GO:0005886|plasma membrane;	.	K06725	LAIR; leukocyte-associated Ig-like receptor
ENSSSCG00000034285	0.0	0.0	0.00635614394415867	0.0	0.0	0.0	RAG2	protein_coding	chr2:24547691-24556988:+	gi|190360671|ref|NP_001121953.1|	2741	0.0	V(D)J recombination-activating protein 2 [Sus scrofa]	gi|254746248|emb|FP102503.6|	9241	0.0	Pig DNA sequence from clone CH242-427N16 on chromosome 2, complete sequence	P34089	974	0.0	V(D)J recombination-activating protein 2	.	.	.	.	pfam03089	RAG2	Recombination activating protein 2. V-D-J recombination is the combinatorial process by which the huge range of immunoglobulin and T cell binding specificity is generated from a limited amount of genetic material. This process is synergistically activated by RAG1 and RAG2 in developing lymphocytes. Defects in RAG2 in humans are a cause of severe combined immunodeficiency B cell negative and Omenn…	GO:0030183|B cell differentiation;GO:0002358|B cell homeostatic proliferation;GO:0002326|B cell lineage commitment;GO:0016569|covalent chromatin modification;GO:0046622|positive regulation of organ growth;GO:0002331|pre-B cell allelic exclusion;GO:0033077|T cell differentiation in thymus;GO:0002360|T cell lineage commitment;GO:0033151|V(D)J recombination;	GO:0005634|nucleus;	GO:0003682|chromatin binding;GO:0003677|DNA binding;GO:0035064|methylated histone binding;GO:0035091|phosphatidylinositol binding;GO:0005547|phosphatidylinositol-3,4,5-trisphosphate binding;GO:0043325|phosphatidylinositol-3,4-bisphosphate binding;GO:0080025|phosphatidylinositol-3,5-bisphosphate binding;GO:0005546|phosphatidylinositol-4,5-bisphosphate binding;GO:0061630|ubiquitin protein ligase ac…	K10988	RAG2; recombination-activating protein 2
ENSSSCG00000034283	0.2112758524147373	0.40317361107569905	0.0	0.22718557640722936	0.8084893294090684	0.0	ENSSSCG00000034283	protein_coding	chr2:8280373-8320348:+	.	.	.	.	.	.	.	.	.	.	.	.	.	.	.	.	pfam10325	7TM_GPCR_Srz	Serpentine type 7TM GPCR chemoreceptor Srz. Chemoreception is mediated in Caenorhabditis elegans by members of the seven-transmembrane G-protein-coupled receptor class (7TM GPCRs) of proteins which are of the serpentine type. Srz is a solo families amongst the superfamilies of chemoreceptors. Chemoperception is one of the central senses of soil nematodes like C. elegans which are otherwise 'blind…	.	.	.	.	.
ENSSSCG00000034280	3.9232141456352254	3.7144281157488206	3.9152465771231504	4.110195844400559	3.83042848446775	3.5582115819989384	LARP1B	protein_coding	chr8:96751303-96856344:-	gi|927169688|ref|XP_013834349.1|	4458	0.0	PREDICTED: la-related protein 1B isoform X4 [Sus scrofa]	gi|927169679|ref|XM_013978893.1|	4447	0.0	PREDICTED: Sus scrofa La ribonucleoprotein domain family, member 1B (LARP1B), transcript variant X2, mRNA	Q659C4	1358	0.0	La-related protein 1B	SPAC1527.03	78.6	6e-14	COG5193	pfam05383	La	La domain. This presumed domain is found at the N-terminus of La RNA-binding proteins as well as other proteins. The function of this region is uncertain.	.	GO:0005634|nucleus;	GO:0044822|poly(A) RNA binding;	K18757	LARP1; la-related protein 1
ENSSSCG00000021042	5.632075997903021	6.099845131918028	5.379003862827116	5.2546343213498075	5.967481708116723	5.675005973667147	BRWD1	protein_coding	chr13:202762510-202940047:-	gi|157041264|ref|NP_001096644.1|	9377	0.0	bromodomain and WD repeat-containing protein 1 [Bos taurus]	gi|556779272|ref|XM_005984630.1|	6195	0.0	PREDICTED: Pantholops hodgsonii bromodomain and WD repeat domain containing 1 (BRWD1), transcript variant X1, mRNA	O95456	514	0.0	Proteasome assembly chaperone 1	all0283_3	129	1e-29	COG2319	pfam00439	Bromodomain	Bromodomain. Bromodomains are 110 amino acid long domains, that are found in many chromatin associated proteins. Bromodomains can interact specifically with acetylated lysine.	GO:0007010|cytoskeleton organization;GO:0008360|regulation of cell shape;GO:0006357|regulation of transcription from RNA polymerase II promoter;GO:0006351|transcription, DNA-templated;	GO:0005737|cytoplasm;GO:0005730|nucleolus;GO:0005634|nucleus;	.	K11798	BRWD1_3; bromodomain and WD repeat domain containing protein 1/3
ENSSSCG00000021040	2.5901008233162295	2.792591126146335	2.0899600689001407	2.8129948462650733	2.948682890206276	2.224721292849022	SLC26A11	protein_coding	chr12:2220689-2241784:-	gi|350590113|ref|XP_003482991.1|	2817	0.0	PREDICTED: sodium-independent sulfate anion transporter [Sus scrofa]	gi|927192638|ref|XM_003482943.3|	2534	0.0	PREDICTED: Sus scrofa sodium-independent sulfate anion transporter (LOC100737294), mRNA	Q58DD2	1011	0.0	Sodium-independent sulfate anion transporter	SPBC3H7.02	213	2e-57	COG0659	pfam00916	Sulfate_transp	Sulfate transporter family. Mutations in human SLC26A2 lead to several human diseases.	GO:0015701|bicarbonate transport;GO:1902476|chloride transmembrane transport;GO:0051453|regulation of intracellular pH;GO:0042391|regulation of membrane potential;GO:0008272|sulfate transport;	GO:0005783|endoplasmic reticulum;GO:0070062|extracellular exosome;GO:0005794|Golgi apparatus;GO:0016021|integral component of membrane;GO:0005887|integral component of plasma membrane;GO:0005765|lysosomal membrane;GO:0005654|nucleoplasm;GO:0005886|plasma membrane;	GO:0008509|anion transmembrane transporter activity;GO:0015301|anion:anion antiporter activity;GO:0015106|bicarbonate transmembrane transporter activity;GO:0005254|chloride channel activity;GO:0019531|oxalate transmembrane transporter activity;GO:0008271|secondary active sulfate transmembrane transporter activity;GO:0015116|sulfate transmembrane transporter activity;	K14708	SLC26A11; solute carrier family 26 (sodium-independent sulfate anion transporter), member 11
ENSSSCG00000021041	1.9351529147549285	1.9929476543760556	2.010371913640948	3.005709639027985	3.761396768322525	1.7872745918335085	ENSSSCG00000021041	protein_coding	chr9:66522017-66550523:-	gi|343478257|ref|NP_001230394.1|	2607	0.0	probable carboxypeptidase PM20D1 [Sus scrofa]	gi|371916024|dbj|AK389959.1|	1943	0.0	Sus scrofa mRNA, clone: BFLT10011C10, expressed in brain (frontal lobe)	Q2T9M7	775	0.0	N-fatty-acyl-amino acid synthase/hydrolase PM20D1	RSp0487	298	1e-91	COG0624	pfam01546	Peptidase_M20	Peptidase family M20/M25/M40. This family includes a range of zinc metallopeptidases belonging to several families in the peptidase classification. Family M20 are Glutamate carboxypeptidases. Peptidase family M25 contains X-His dipeptidases.	GO:1990845|adaptive thermogenesis;GO:0043604|amide biosynthetic process;GO:0043605|cellular amide catabolic process;GO:0006520|cellular amino acid metabolic process;GO:0044255|cellular lipid metabolic process;GO:0097009|energy homeostasis;GO:0043171|peptide catabolic process;GO:2000275|regulation of oxidative phosphorylation uncoupler activity;	GO:0005615|extracellular space;	GO:0016811|hydrolase activity, acting on carbon-nitrogen (but not peptide) bonds, in linear amides;GO:0070573|metallodipeptidase activity;GO:0008270|zinc ion binding;	K13049	PM20D1; carboxypeptidase PM20D1 [EC:3.4.17.-]
ENSSSCG00000035739	0.038213371567187265	0.10938275361358095	0.08565134259824249	0.041090956428438005	0.05483666755991943	0.10587967630295954	SLC26A1	protein_coding	chr8:334611-343870:-	gi|560981758|ref|XP_006213116.1|	2726	0.0	PREDICTED: sulfate anion transporter 1 [Vicugna pacos]	gi|371921812|dbj|AK394239.1|	2779	0.0	Sus scrofa mRNA, clone: LVRM10112B06, expressed in liver	P58735	942	0.0	Sulfate anion transporter 1	Cgl1025	164	3e-41	COG0659	pfam00916	Sulfate_transp	Sulfate transporter family. Mutations in human SLC26A2 lead to several human diseases.	GO:0015701|bicarbonate transport;GO:0006821|chloride transport;GO:0019532|oxalate transport;GO:0051453|regulation of intracellular pH;GO:0042391|regulation of membrane potential;GO:0008272|sulfate transport;	GO:0005887|integral component of plasma membrane;	GO:0015301|anion:anion antiporter activity;GO:0015106|bicarbonate transmembrane transporter activity;GO:0005254|chloride channel activity;GO:0015108|chloride transmembrane transporter activity;GO:0019531|oxalate transmembrane transporter activity;GO:0008271|secondary active sulfate transmembrane transporter activity;GO:0015116|sulfate transmembrane transporter activity;	K14700	SLC26A1, SAT1; solute carrier family 26 (sulfate anion transporter), member 1
ENSSSCG00000029212	13.085715072927036	11.333569470951728	13.165713800373412	14.10619986896056	14.95385065612951	13.83380869715772	GDE1	protein_coding	chr3:26190139-26206097:+	gi|350581678|ref|XP_003354637.2|	1740	0.0	PREDICTED: glycerophosphodiester phosphodiesterase 1 [Sus scrofa]	gi|927108357|ref|XM_003354589.4|	1645	0.0	PREDICTED: Sus scrofa glycerophosphodiester phosphodiesterase 1 (GDE1), mRNA	Q3T0T0	554	0.0	Glycerophosphodiester phosphodiesterase 1	FN1891	93.2	7e-21	COG0584	pfam03009	GDPD	Glycerophosphoryl diester phosphodiesterase family. Escherichia coli has two sequence related isozymes of glycerophosphoryl diester phosphodiesterase (GDPD) - periplasmic and cytosolic. This family also includes agrocinopine synthase, the similarity to GDPD has been noted. This family appears to have weak but not significant matches to mammalian phospholipase C pfam00388, which suggests that this…	GO:0006629|lipid metabolic process;	GO:0030659|cytoplasmic vesicle membrane;GO:0016021|integral component of membrane;GO:0005886|plasma membrane;	GO:0008889|glycerophosphodiester phosphodiesterase activity;GO:0047395|glycerophosphoinositol glycerophosphodiesterase activity;GO:0046872|metal ion binding;	K19179	GDE1; glycerophosphoinositol glycerophosphodiesterase [EC:3.1.4.44]
ENSSSCG00000035731	0.245962932661933	0.0	0.0	0.0	0.11765329793639429	0.0	ENSSSCG00000035731	lincRNA	chr1:54017277-54180269:-	.	.	.	.	gi|927094693|ref|XR_300741.2|	268	2e-136	PREDICTED: Sus scrofa uncharacterized LOC102157437 (LOC102157437), ncRNA	.	.	.	.	.	.	.	.	pfam01366	PRTP	Herpesvirus processing and transport protein. The members of this family are associate with capsid intermediates during packaging of the virus.	.	.	.	.	.
ENSSSCG00000035730	3.3285360035874256	3.3160031556493386	4.35931412501253	2.035222866665952	2.786286369644173	2.5618164253995777	ZDHHC21	protein_coding	chr1:207836573-207912546:+	gi|970724959|ref|XP_015098177.1|	1411	1e-174	PREDICTED: palmitoyltransferase ZDHHC21 isoform X1 [Vicugna pacos]	gi|593741074|ref|XM_007125994.1|	2663	0.0	PREDICTED: Physeter catodon probable palmitoyltransferase ZDHHC21-like (LOC102973171), transcript variant X1, mRNA	A2VDT6	510	3e-163	Probable palmitoyltransferase ZDHHC21	SPBC2F12.15c	87.8	3e-17	COG5273	pfam01529	zf-DHHC	DHHC palmitoyltransferase. This family includes the well known DHHC zinc binding domain as well as three of the four conserved transmembrane regions found in this family of palmitoyltransferase enzymes.	GO:0001942|hair follicle development;GO:0018230|peptidyl-L-cysteine S-palmitoylation;GO:0048733|sebaceous gland development;	GO:0005794|Golgi apparatus;GO:0016021|integral component of membrane;GO:0005886|plasma membrane;	GO:0019706|protein-cysteine S-palmitoyltransferase activity;GO:0008270|zinc ion binding;	K18932	ZDHHC; palmitoyltransferase [EC:2.3.1.225]
ENSSSCG00000035733	6.950273419255563	7.359928179951069	5.201701779183899	4.796841560105271	6.191904682936522	4.751523741440719	PLXNB2	protein_coding	chr5:390363-418324:+	gi|755751608|ref|XP_011282664.1|	9097	0.0	PREDICTED: plexin-B2 [Felis catus]	gi|946626095|ref|XM_014555026.1|	4287	0.0	PREDICTED: Camelus ferus plexin B2 (PLXNB2), transcript variant X1, mRNA	O15031	202	1e-90	Plexin-B2	.	.	.	.	pfam08337	Plexin_cytopl	Plexin cytoplasmic RasGAP domain. This family features the C-terminal regions of various plexins. Plexins are receptors for semaphorins, and plexin signalling is important in path finding and patterning of both neurons and developing blood vessels. The cytoplasmic region, which has been called a SEX domain in some members of this family, is involved in downstream signalling pathways, by interacti…	GO:0007420|brain development;GO:0007156|homophilic cell adhesion via plasma membrane adhesion molecules;GO:0007162|negative regulation of cell adhesion;GO:0001843|neural tube closure;GO:0007405|neuroblast proliferation;GO:0050772|positive regulation of axonogenesis;GO:0010976|positive regulation of neuron projection development;GO:0030334|regulation of cell migration;GO:0008360|regulation of cell…	GO:0009986|cell surface;GO:0070062|extracellular exosome;GO:0005887|integral component of plasma membrane;GO:0002116|semaphorin receptor complex;	GO:0017154|semaphorin receptor activity;	K06821	PLXNB; plexin B
ENSSSCG00000035732	0.5661674376365475	0.4630312883028887	1.7403512066587676	0.34788662497695977	0.07737689287595992	0.37350192560859957	ENSSSCG00000035732	protein_coding	chr4:127236599-127245376:+	gi|927125693|ref|XP_005663763.2|	793	4e-98	PREDICTED: LOW QUALITY PROTEIN: guanylate-binding protein 6 [Sus scrofa]	gi|927125692|ref|XM_005663706.2|	416	0.0	PREDICTED: Sus scrofa guanylate-binding protein 6 (LOC100523310), mRNA	Q5R9T9	59.3	6e-31	Guanylate-binding protein 6	.	.	.	.	pfam02263	GBP	Guanylate-binding protein, N-terminal domain. Transcription of the anti-viral guanylate-binding protein (GBP) is induced by interferon-gamma during macrophage induction. This family contains GBP1 and GPB2, both GTPases capable of binding GTP, GDP and GMP.	GO:0071346|cellular response to interferon-gamma;GO:0042742|defense response to bacterium;GO:0006955|immune response;	.	GO:0005525|GTP binding;GO:0003924|GTPase activity;	.	.
ENSSSCG00000035734	0.0	0.0	0.0	0.0	0.0	0.0298289141960812	ENSSSCG00000035734	protein_coding	chr7:66829188-66831228:+	gi|148645275|gb|ABR01161.1|	1503	0.0	transposase [Sus scrofa]	gi|237678860|emb|CU993810.7|	1867	0.0	Pig DNA sequence from clone CH242-56M9 on chromosome 2, complete sequence	Q9UN81	226	1e-65	LINE-1 retrotransposable element ORF1 protein	.	.	.	.	pfam02994	Transposase_22	L1 transposable element.	GO:0032197|transposition, RNA-mediated;	GO:0005737|cytoplasm;GO:0010494|cytoplasmic stress granule;GO:0030529|ribonucleoprotein complex;GO:0005730|nucleolus;	GO:0042802|identical protein binding;GO:0000166|nucleotide binding;GO:0003697|single-stranded DNA binding;GO:0003727|single-stranded RNA binding;	.	.
ENSSSCG00000029219	271.8720878497984	353.7467408816918	350.92074589125974	276.65697901641073	261.67233880743294	230.638947552509	SH3BGR	protein_coding	chr13:203046553-203108649:+	gi|970717734|ref|XP_006205024.2|	760	2e-95	PREDICTED: LOW QUALITY PROTEIN: SH3 domain-binding glutamic acid-rich protein [Vicugna pacos]	gi|346644825|ref|NM_001244236.1|	1181	0.0	Sus scrofa SH3 domain binding glutamate-rich protein (SH3BGR), mRNA	Q9WUZ7	241	4e-76	SH3 domain-binding glutamic acid-rich protein	.	.	.	.	pfam04908	SH3BGR	SH3-binding, glutamic acid-rich protein.	.	GO:0005829|cytosol;	.	.	.
ENSSSCG00000035736	6.933941885755365	10.925028315072714	3.926328673846078	4.0714170841810455	6.415320865746975	7.499505100074677	CCL24	protein_coding	chr3:10347408-10361497:+	gi|238650175|ref|NP_001154906.1|	573	1e-68	C-C motif chemokine 24 precursor [Sus scrofa]	gi|18642739|gb|AC091506.2|	1047	0.0	Sus scrofa clone RP44-348C20, complete sequence	O00175	150	8e-42	C-C motif chemokine 24	.	.	.	.	pfam00048	IL8	Small cytokines (intecrine/chemokine), interleukin-8 like. Includes a number of secreted growth factors and interferons involved in mitogenic, chemotactic, and inflammatory activity. Structure contains two highly conserved disulfide bonds.	GO:0007267|cell-cell signaling;GO:0071346|cellular response to interferon-gamma;GO:0071347|cellular response to interleukin-1;GO:0071356|cellular response to tumor necrosis factor;GO:0070098|chemokine-mediated signaling pathway;GO:0006935|chemotaxis;GO:0007010|cytoskeleton organization;GO:0048245|eosinophil chemotaxis;GO:0007186|G-protein coupled receptor signaling pathway;GO:0006955|immune respo…	GO:0005615|extracellular space;	GO:0048020|CCR chemokine receptor binding;GO:0008009|chemokine activity;	K05514	CCLX; C-C motif chemokine, other
ENSSSCG00000016409	21.003482384603267	24.0207523723194	20.33667932858654	16.25428771651767	17.035423930463736	16.813112434300095	UBE3C	protein_coding	chr18:1543777-1654356:-	gi|471364545|ref|XP_004372819.1|	5206	0.0	PREDICTED: ubiquitin-protein ligase E3C [Trichechus manatus latirostris]	gi|528947565|ref|XM_005205800.1|	2191	0.0	PREDICTED: Bos taurus ubiquitin protein ligase E3C (UBE3C), transcript variant X1, mRNA	Q15386	1993	0.0	Ubiquitin-protein ligase E3C	SPAC167.07c	339	2e-97	COG5021	pfam00632	HECT	HECT-domain (ubiquitin-transferase). The name HECT comes from Homologous to the E6-AP Carboxyl Terminus.	GO:0000209|protein polyubiquitination;GO:0042787|protein ubiquitination involved in ubiquitin-dependent protein catabolic process;	GO:0005737|cytoplasm;GO:0005622|intracellular;GO:0005634|nucleus;GO:0000502|proteasome complex;	GO:0004842|ubiquitin-protein transferase activity;	K10589	UBE3C; ubiquitin-protein ligase E3 C [EC:2.3.2.26]
ENSSSCG00000033880	0.07557244591963087	0.2073068094783044	0.14397968596695104	0.0203158211060635	0.02711185197502465	0.026174038638951732	TSPAN32	protein_coding	chr2:1585017-1602896:+	gi|821405128|ref|XP_012391498.1|	793	7e-101	PREDICTED: tetraspanin-32 [Orcinus orca]	gi|958805636|ref|XM_014830242.1|	400	0.0	PREDICTED: Equus asinus tetraspanin 32 (TSPAN32), mRNA	Q96QS1	214	6e-62	Tetraspanin-32	.	.	.	.	pfam00335	Tetraspannin	Tetraspanin family.	GO:0007166|cell surface receptor signaling pathway;GO:0007267|cell-cell signaling;GO:0007010|cytoskeleton organization;GO:0042832|defense response to protozoan;GO:0007229|integrin-mediated signaling pathway;GO:0008285|negative regulation of cell proliferation;GO:0030886|negative regulation of myeloid dendritic cell activation;GO:0070527|platelet aggregation;GO:0050688|regulation of defense respon…	GO:0009986|cell surface;GO:0005887|integral component of plasma membrane;GO:0070442|integrin alphaIIb-beta3 complex;GO:0005622|intracellular;	.	K17359	TSPAN32; tetraspanin-32
ENSSSCG00000016406	7.96370542990291	7.817416448431088	5.68280198671762	4.543843325433293	4.957171122566755	6.993126118690032	ESYT2	protein_coding	chr18:565145-643306:+	gi|803268670|ref|XP_011994065.1|	4073	0.0	PREDICTED: extended synaptotagmin-2 isoform X2 [Ovis aries musimon]	gi|927215844|ref|XM_013983444.1|	4677	0.0	PREDICTED: Sus scrofa extended synaptotagmin-like protein 2 (ESYT2), mRNA	Q3TZZ7	1462	0.0	Extended synaptotagmin-2	SPAPYUK71.03c	68.9	2e-10	COG5038	pfam00168	C2	C2 domain.	GO:0006897|endocytosis;GO:0006869|lipid transport;	GO:0005913|cell-cell adherens junction;GO:0031234|extrinsic component of cytoplasmic side of plasma membrane;GO:0005887|integral component of plasma membrane;GO:0031227|intrinsic component of endoplasmic reticulum membrane;GO:0016020|membrane;GO:0044232|organelle membrane contact site;	GO:0098641|cadherin binding involved in cell-cell adhesion;GO:0005509|calcium ion binding;GO:0005544|calcium-dependent phospholipid binding;GO:0042802|identical protein binding;GO:0031210|phosphatidylcholine binding;GO:0008429|phosphatidylethanolamine binding;GO:0035091|phosphatidylinositol binding;	.	.
ENSSSCG00000033882	0.0	0.0	0.0	0.7052925357119957	0.0	0.0	ENSSSCG00000033882	protein_coding	chr4:18598948-18651536:-	gi|532036142|ref|XP_005360962.1|	199	1e-17	PREDICTED: 50S ribosomal protein L13-like [Microtus ochrogaster]	.	.	.	.	Q9D1P0	79.0	3e-18	39S ribosomal protein L13, mitochondrial	.	.	.	.	pfam13844	Glyco_transf_41	Glycosyl transferase family 41. This family of glycosyltransferases includes O-linked beta-N-acetylglucosamine (O-GlcNAc) transferase, an enzyme which catalyses the addition of O-GlcNAc to serine and threonine residues. In addition to its function as an O-GlcNAc transferase, human OGT also appears to proteolytically cleave the epigenetic cell-cycle regulator HCF-1.	GO:0006412|translation;	GO:0005762|mitochondrial large ribosomal subunit;GO:0005761|mitochondrial ribosome;GO:0005739|mitochondrion;	GO:0003729|mRNA binding;GO:0044822|poly(A) RNA binding;GO:0003735|structural constituent of ribosome;	K02871	RP-L13, MRPL13, rplM; large subunit ribosomal protein L13
ENSSSCG00000016402	0.0	0.10404480285824491	0.09776580048434626	0.23451414338810772	0.05216060189735925	0.15106901705757256	AGXT	protein_coding	chr15:139720743-139730478:+	gi|335303701|ref|XP_003133882.2|	1869	0.0	PREDICTED: serine--pyruvate aminotransferase [Sus scrofa]	gi|927212200|ref|XM_003133834.4|	1089	0.0	PREDICTED: Sus scrofa alanine-glyoxylate aminotransferase (AGXT), mRNA	P41689	632	0.0	Serine--pyruvate aminotransferase, mitochondrial	alr1004	275	3e-87	COG0075	pfam00266	Aminotran_5	Aminotransferase class-V. This domain is found in amino transferases, and other enzymes including cysteine desulphurase EC:4.4.1.-.	GO:0019265|glycine biosynthetic process, by transamination of glyoxylate;GO:0010498|proteasomal protein catabolic process;	GO:0005759|mitochondrial matrix;GO:0005739|mitochondrion;GO:0005777|peroxisome;	GO:0008453|alanine-glyoxylate transaminase activity;GO:0042803|protein homodimerization activity;GO:0043621|protein self-association;GO:0004760|serine-pyruvate transaminase activity;	K00830	AGXT; alanine-glyoxylate transaminase / serine-glyoxylate transaminase / serine-pyruvate transaminase [EC:2.6.1.44 2.6.1.45 2.6.1.51]
ENSSSCG00000016403	0.2676372602619168	0.38777419796092794	0.39992093047750815	0.23449651074574773	0.17069458924666647	0.155635163287433	VIPR2	protein_coding	chr18:396299-518102:+	gi|304365436|ref|NP_001182046.1|	2274	0.0	vasoactive intestinal polypeptide receptor 2 precursor [Sus scrofa]	gi|645929761|gb|KJ410050.1|	1584	0.0	Sus scrofa vasoactive intestinal polypeptide receptor 2 variant 1 (VPAC2R) mRNA, complete cds, alternatively spliced	P35000	747	0.0	Vasoactive intestinal polypeptide receptor 2	.	.	.	.	pfam00002	7tm_2	7 transmembrane receptor (Secretin family). This family is known as Family B, the secretin-receptor family or family 2 of the G-protein-coupled receptors (GCPRs).They have been described in many animal species, but not in plants, fungi or prokaryotes. Three distinct sub-families are recognized. Subfamily B1 contains classical hormone receptors, such as receptors for secretin and glucagon, that ar…	GO:0007190|activation of adenylate cyclase activity;GO:0007166|cell surface receptor signaling pathway;GO:0007267|cell-cell signaling;GO:0048662|negative regulation of smooth muscle cell proliferation;GO:0007165|signal transduction;	GO:0005887|integral component of plasma membrane;GO:0005886|plasma membrane;	GO:0004930|G-protein coupled receptor activity;GO:0004999|vasoactive intestinal polypeptide receptor activity;	K04590	VIPR2; vasoactive intestinal peptide receptor 2
ENSSSCG00000032007	146.38217892608495	128.51946149626556	130.67033251134282	155.30905504754813	101.17109577637143	126.53659354245849	RTN4	protein_coding	chr3:86180050-86252544:+	gi|545817464|ref|XP_005662598.1|	4726	0.0	PREDICTED: reticulon-4 isoform X2 [Sus scrofa]	gi|927111419|ref|XM_005662541.2|	4421	0.0	PREDICTED: Sus scrofa reticulon 4 (RTN4), transcript variant X2, mRNA	Q9NQC3	1407	0.0	Reticulon-4	.	.	.	.	pfam02453	Reticulon	Reticulon. Reticulon, also know as neuroendocrine-specific protein (NSP), is a protein of unknown function which associates with the endoplasmic reticulum. This family represents the C-terminal domain of the three reticulon isoforms and their homologues.	GO:0006915|apoptotic process;GO:0007413|axonal fasciculation;GO:0060317|cardiac epithelial to mesenchymal transition;GO:0021801|cerebral cortex radial glia guided migration;GO:0071787|endoplasmic reticulum tubular network assembly;GO:0071786|endoplasmic reticulum tubular network organization;GO:0030517|negative regulation of axon extension;GO:0050771|negative regulation of axonogenesis;GO:0030308…	GO:0042995|cell projection;GO:0005913|cell-cell adherens junction;GO:0005783|endoplasmic reticulum;GO:0005789|endoplasmic reticulum membrane;GO:0070062|extracellular exosome;GO:0030176|integral component of endoplasmic reticulum membrane;GO:0005622|intracellular;GO:0005635|nuclear envelope;GO:0005886|plasma membrane;	GO:0098641|cadherin binding involved in cell-cell adhesion;GO:0044822|poly(A) RNA binding;	.	.
ENSSSCG00000021368	0.0	0.0	0.0	0.0	0.0	0.13805173214104702	ENSSSCG00000021368	protein_coding	chr17:24548618-24663842:+	gi|724913607|ref|XP_010379759.1|	417	2e-48	PREDICTED: O-acetyl-ADP-ribose deacetylase MACROD2 isoform X1 [Rhinopithecus roxellana]	gi|371916082|dbj|AK390010.1|	232	1e-116	Sus scrofa mRNA, clone: BFLT10016D07, expressed in brain (frontal lobe)	A1Z1Q3	152	1e-42	O-acetyl-ADP-ribose deacetylase MACROD2	.	.	.	.	pfam05917	DUF874	Helicobacter pylori protein of unknown function (DUF874). This family consists of several hypothetical proteins specific to Helicobacter pylori. The function of this family is unknown.	GO:0007420|brain development;GO:0006974|cellular response to DNA damage stimulus;GO:0051725|protein de-ADP-ribosylation;GO:0042278|purine nucleoside metabolic process;	GO:0005634|nucleus;	GO:0019213|deacetylase activity;GO:0016798|hydrolase activity, acting on glycosyl bonds;	.	.
ENSSSCG00000009733	5.507493282015751	5.910810438131776	5.040509737038471	4.7078605107256015	4.9244076324603	4.769186040300595	GOLGA3	protein_coding	chr14:22689335-22738540:+	gi|350592384|ref|XP_001927025.4|	6214	0.0	PREDICTED: golgin subfamily A member 3 isoform X1 [Sus scrofa]	gi|927204343|ref|XM_001926990.6|	4467	0.0	PREDICTED: Sus scrofa golgin A3 (GOLGA3), transcript variant X1, mRNA	Q08378	1915	0.0	Golgin subfamily A member 3	.	.	.	.	pfam01576	Myosin_tail_1	Myosin tail. The myosin molecule is a multi-subunit complex made up of two heavy chains and four light chains it is a fundamental contractile protein found in all eukaryote cell types. This family consists of the coiled-coil myosin heavy chain tail region. The coiled-coil is composed of the tail from two molecules of myosin. These can then assemble into the macromolecular thick filament. The coil…	GO:0006891|intra-Golgi vesicle-mediated transport;GO:0007283|spermatogenesis;	GO:0005913|cell-cell adherens junction;GO:0005829|cytosol;GO:0090498|extrinsic component of Golgi membrane;GO:0005794|Golgi apparatus;GO:0032580|Golgi cisterna membrane;GO:0000139|Golgi membrane;GO:0017119|Golgi transport complex;GO:0016020|membrane;GO:0005730|nucleolus;GO:0005654|nucleoplasm;GO:0005634|nucleus;	GO:0098641|cadherin binding involved in cell-cell adhesion;GO:0005215|transporter activity;	.	.
ENSSSCG00000000003	1.9836142671749257	1.5450174000690042	1.076734687606565	0.609424727377755	1.0327478844447464	1.0094873948434677	TTC38	protein_coding	chr5:3245883-3270814:-	gi|350583690|ref|XP_003125999.3|	2459	0.0	PREDICTED: tetratricopeptide repeat protein 38 isoform X2 [Sus scrofa]	gi|927126289|ref|XM_003125951.5|	2321	0.0	PREDICTED: Sus scrofa tetratricopeptide repeat domain 38 (TTC38), transcript variant X2, mRNA	Q5RFF7	831	0.0	Tetratricopeptide repeat protein 38	.	.	.	.	pfam03154	Atrophin-1	Atrophin-1 family. Atrophin-1 is the protein product of the dentatorubral-pallidoluysian atrophy (DRPLA) gene. DRPLA OMIM:125370 is a progressive neurodegenerative disorder. It is caused by the expansion of a CAG repeat in the DRPLA gene on chromosome 12p. This results in an extended polyglutamine region in atrophin-1, that is thought to confer toxicity to the protein, possibly through altering i…	.	GO:0070062|extracellular exosome;	.	.	.
ENSSSCG00000000002	0.17013553013495336	0.34270335051000056	0.10169101186025922	0.36589452168138803	0.23510415257263992	0.06983746931368137	GTSE1	protein_coding	chr5:3227814-3246479:-	gi|545824384|ref|XP_005655528.1|	1873	0.0	PREDICTED: G2 and S phase-expressed protein 1 isoform X2 [Sus scrofa]	gi|927126300|ref|XM_005655471.2|	2580	0.0	PREDICTED: Sus scrofa G-2 and S-phase expressed 1 (GTSE1), transcript variant X2, mRNA	Q8R080	133	6e-62	G2 and S phase-expressed protein 1	.	.	.	.	pfam15259	GTSE1_N	G-2 and S-phase expressed 1. This family is the N-terminus of GTSE1 proteins. GTSE-1 (G2 and S phase-expressed-1) protein is specifically expressed during S and G2 phases of the cell cycle. It is mainly localized to the microtubules and when overexpressed delays the G2 to M transition. the full protein negatively regulates p53 transactivation function, protein levels, and p53-dependent apoptosis.…	GO:0006977|DNA damage response, signal transduction by p53 class mediator resulting in cell cycle arrest;GO:0007017|microtubule-based process;GO:1904527|negative regulation of microtubule binding;GO:0030335|positive regulation of cell migration;GO:0046827|positive regulation of protein export from nucleus;GO:1900182|positive regulation of protein localization to nucleus;GO:0043161|proteasome-medi…	GO:0005881|cytoplasmic microtubule;GO:0005829|cytosol;GO:0016020|membrane;GO:0005654|nucleoplasm;	.	K10129	GTSE1, B99; G-2 and S-phase expressed protein 1
ENSSSCG00000012591	21.736024602593357	24.126377668959712	22.233225682934133	30.722235331228337	28.986010637401996	29.800471052879434	AMOT	protein_coding	chrX:92581998-92647857:-	gi|545886363|ref|XP_005673893.1|	3683	0.0	PREDICTED: angiomotin isoform X1 [Sus scrofa]	gi|927219631|ref|XM_005673836.2|	7706	0.0	PREDICTED: Sus scrofa angiomotin (AMOT), transcript variant X1, mRNA	Q4VCS5	100	7e-20	Angiomotin	.	.	.	.	pfam12240	Angiomotin_C	Angiomotin C terminal. This domain family is found in eukaryotes, and is typically between 197 and 211 amino acids in length. This family is the C terminal region of angiomotin. Angiomotin regulates the action of angiogenesis inhibitor angiostatin. The C terminal region of angiomotin appears to be involved in directing the protein chemotactically.	GO:0030036|actin cytoskeleton organization;GO:0043534|blood vessel endothelial cell migration;GO:0042074|cell migration involved in gastrulation;GO:0007043|cell-cell junction assembly;GO:0034613|cellular protein localization;GO:0006935|chemotaxis;GO:0003365|establishment of cell polarity involved in ameboidal cell migration;GO:0001702|gastrulation with mouth forming second;GO:0035329|hippo signal…	GO:0005884|actin filament;GO:0005923|bicellular tight junction;GO:0009986|cell surface;GO:0005737|cytoplasm;GO:0005829|cytosol;GO:0030139|endocytic vesicle;GO:0009897|external side of plasma membrane;GO:0016021|integral component of membrane;GO:0030027|lamellipodium;GO:0001726|ruffle;GO:0001725|stress fiber;	GO:0043532|angiostatin binding;GO:0004872|receptor activity;	K16819	AMOT; angiomotin
ENSSSCG00000000007	7.9549394328236565	6.331463815898304	8.099739457107297	3.9116148486076745	5.927614307189592	4.984178212866728	TRMU	protein_coding	chr5:3208118-3224387:-	gi|743728757|ref|XP_010958450.1|	2057	0.0	PREDICTED: mitochondrial tRNA-specific 2-thiouridylase 1 [Camelus bactrianus]	gi|927126303|ref|XM_013988185.1|	1468	0.0	PREDICTED: Sus scrofa tRNA 5-methylaminomethyl-2-thiouridylate methyltransferase (TRMU), mRNA	O75648	362	2e-120	Mitochondrial tRNA-specific 2-thiouridylase 1	lin1547	301	6e-96	COG0482	pfam03054	tRNA_Me_trans	tRNA methyl transferase. This family represents tRNA(5-methylaminomethyl-2-thiouridine)-methyltransferase which is involved in the biosynthesis of the modified nucleoside 5-methylaminomethyl-2-thiouridine present in the wobble position of some tRNAs.	GO:0070903|mitochondrial tRNA thio-modification;GO:0002143|tRNA wobble position uridine thiolation;	GO:0005739|mitochondrion;GO:0005654|nucleoplasm;	GO:0005524|ATP binding;GO:0016783|sulfurtransferase activity;GO:0000049|tRNA binding;	K00566	mnmA, trmU, TRMU; tRNA-specific 2-thiouridylase [EC:2.8.1.-]
ENSSSCG00000000006	3.615164585763283	3.494171295989392	2.7781781637635063	4.190311742622231	4.356859164037758	4.553052319651839	PPARA	protein_coding	chr5:3302755-3321091:-	gi|113205560|ref|NP_001037991.1|	2482	0.0	peroxisome proliferator-activated receptor alpha [Sus scrofa]	gi|113205559|ref|NM_001044526.1|	1372	0.0	Sus scrofa peroxisome proliferator-activated receptor alpha (PPARA), mRNA	Q95N78	927	0.0	Peroxisome proliferator-activated receptor alpha	.	.	.	.	pfam00105	zf-C4	Zinc finger, C4 type (two domains). In nearly all cases, this is the DNA binding domain of a nuclear hormone receptor. The alignment contains two Zinc finger domains that are too dissimilar to be aligned with each other.	GO:0032922|circadian regulation of gene expression;GO:0070166|enamel mineralization;GO:0008544|epidermis development;GO:0006631|fatty acid metabolic process;GO:0032099|negative regulation of appetite;GO:0010887|negative regulation of cholesterol storage;GO:0050728|negative regulation of inflammatory response;GO:1903038|negative regulation of leukocyte cell-cell adhesion;GO:0010745|negative regula…	GO:0005634|nucleus;	GO:0003677|DNA binding;GO:0008144|drug binding;GO:0008289|lipid binding;GO:0004872|receptor activity;GO:0000978|RNA polymerase II core promoter proximal region sequence-specific DNA binding;GO:0004879|RNA polymerase II transcription factor activity, ligand-activated sequence-specific DNA binding;GO:0043565|sequence-specific DNA binding;GO:0003707|steroid hormone receptor activity;GO:0003700|trans…	K07294	NR1C1, PPARA; peroxisome proliferator-activated receptor alpha
ENSSSCG00000000005	6.958867751460813	7.880126449423871	6.3075953922696435	5.756070752591519	7.901060453528993	4.167016262851394	CDPF1	protein_coding	chr5:3287462-3294638:+	gi|311254915|ref|XP_003126001.1|	581	4e-72	PREDICTED: cysteine-rich DPF motif domain-containing protein 1 [Sus scrofa]	gi|927126275|ref|XM_005655470.2|	853	0.0	PREDICTED: Sus scrofa cysteine-rich, DPF motif domain containing 1 (CDPF1), transcript variant X2, mRNA	Q6NVV7	179	1e-54	Cysteine-rich DPF motif domain-containing protein 1	.	.	.	.	pfam10170	C6_DPF	Cysteine-rich domain. This is the N-terminal approximately 100 amino acids of a family of proteins found from nematodes to humans. It contains between six and eight highly conserved cysteine residues and a characteristic DPF sequence motif. One member is putatively named as receptor for egg jelly protein but this could not confirmed.	.	GO:0070062|extracellular exosome;	.	.	.
ENSSSCG00000004719	9.732032949125163	7.095855554932303	10.416174206340113	4.1515174804521076	7.131726926787362	6.096297421681199	CDAN1	protein_coding	chr1:128641452-128654897:+	gi|927096444|ref|XP_013848573.1|	4770	0.0	PREDICTED: codanin-1 isoform X1 [Sus scrofa]	gi|927096443|ref|XM_013993119.1|	3342	0.0	PREDICTED: Sus scrofa codanin 1 (CDAN1), transcript variant X1, mRNA	Q8IWY9	1695	0.0	Codanin-1	.	.	.	.	pfam15296	Codanin-1_C	Codanin-1 C-terminus. This domain is found near to the C-terminus of codanin-1.	GO:0031497|chromatin assembly;GO:0006325|chromatin organization;GO:0008156|negative regulation of DNA replication;GO:0008104|protein localization;	GO:0005737|cytoplasm;GO:0012505|endomembrane system;GO:0016021|integral component of membrane;GO:0005634|nucleus;GO:0005886|plasma membrane;	.	K19531	CDAN1; codanin-1
ENSSSCG00000004718	1.8275672418200806	2.5502425054076103	2.1915226560486025	1.3019375122058376	1.715605671104393	1.5191192510630824	TTBK2	protein_coding	chr1:128489682-128635504:+	gi|335279788|ref|XP_003353431.1|	5855	0.0	PREDICTED: tau-tubulin kinase 2 isoform X1 [Sus scrofa]	gi|594648989|ref|XM_007173596.1|	4383	0.0	PREDICTED: Balaenoptera acutorostrata scammoni tau tubulin kinase 2 (TTBK2), transcript variant X4, mRNA	Q6IQ55	1872	0.0	Tau-tubulin kinase 2	.	.	.	.	pfam00069	Pkinase	Protein kinase domain.	GO:0042384|cilium assembly;GO:0018105|peptidyl-serine phosphorylation;GO:0008360|regulation of cell shape;GO:0007224|smoothened signaling pathway;	GO:0005814|centriole;GO:0036064|ciliary basal body;GO:0035869|ciliary transition zone;GO:0005829|cytosol;GO:0005615|extracellular space;GO:0005634|nucleus;	GO:0005524|ATP binding;GO:0004674|protein serine/threonine kinase activity;	K08815	TTBK; tau tubulin kinase [EC:2.7.11.26]
ENSSSCG00000015996	0.6645398518879152	0.4499810839713168	0.615018420998112	0.5071225354338934	0.6460026934497826	0.3959727731655397	RBM45	protein_coding	chr15:83792723-83819027:+	gi|927210556|ref|XP_013846049.1|	2356	0.0	PREDICTED: RNA-binding protein 45 isoform X2 [Sus scrofa]	gi|927210553|ref|XM_013990594.1|	1811	0.0	PREDICTED: Sus scrofa RNA binding motif protein 45 (RBM45), transcript variant X1, mRNA	Q8BHN5	660	0.0	RNA-binding protein 45	.	.	.	.	pfam00076	RRM_1	RNA recognition motif. (a.k.a. RRM, RBD, or RNP domain). The RRM motif is probably diagnostic of an RNA binding protein. RRMs are found in a variety of RNA binding proteins, including various hnRNP proteins, proteins implicated in regulation of alternative splicing, and protein components of snRNPs. The motif also appears in a few single stranded DNA binding proteins. The RRM structure consists o…	GO:0030154|cell differentiation;GO:0007399|nervous system development;	GO:0005737|cytoplasm;GO:0005634|nucleus;	GO:0000166|nucleotide binding;GO:0044822|poly(A) RNA binding;GO:0003723|RNA binding;	.	.
ENSSSCG00000004713	0.15280033832498385	0.0	0.054797799158819945	0.0	0.0	0.11289905215429158	TGM5	protein_coding	chr1:128193607-128216866:+	gi|927096398|ref|XP_013848555.1|	3835	0.0	PREDICTED: protein-glutamine gamma-glutamyltransferase 5 [Sus scrofa]	gi|927096397|ref|XM_013993101.1|	2146	0.0	PREDICTED: Sus scrofa transglutaminase 5 (TGM5), mRNA	O43548	1278	0.0	Protein-glutamine gamma-glutamyltransferase 5	.	.	.	.	pfam00868	Transglut_N	Transglutaminase family.	GO:0006464|cellular protein modification process;GO:0008544|epidermis development;GO:0018149|peptide cross-linking;	GO:0005737|cytoplasm;	GO:0046872|metal ion binding;GO:0003810|protein-glutamine gamma-glutamyltransferase activity;	K05622	TGM5; transglutaminase 5 [EC:2.3.2.13]
ENSSSCG00000004711	0.6732306913535324	1.0333561647997045	0.9972372126669263	1.2590035495391751	1.7361698032958504	1.6761147691831737	LCMT2	protein_coding	chr1:128125668-128127919:+	gi|335279782|ref|XP_003353428.1|	3186	0.0	PREDICTED: tRNA wybutosine-synthesizing protein 4 [Sus scrofa]	gi|159147668|emb|CU210852.10|	2252	0.0	Pig DNA sequence from clone CH242-452O20 on chromosome 1, complete sequence	O60294	976	0.0	tRNA wybutosine-synthesizing protein 4	.	.	.	.	pfam04072	LCM	Leucine carboxyl methyltransferase. Family of leucine carboxyl methyltransferases EC:2.1.1.-. This family may need divides a the full alignment contains a significantly shorter mouse sequence.	GO:0030488|tRNA methylation;GO:0006400|tRNA modification;GO:0031591|wybutosine biosynthetic process;	GO:0005737|cytoplasm;GO:0005829|cytosol;	GO:0008757|S-adenosylmethionine-dependent methyltransferase activity;GO:0008175|tRNA methyltransferase activity;	K15451	PPM2, LCMT2, TYW4; tRNA wybutosine-synthesizing protein 4 [EC:2.1.1.290 2.3.1.231]
ENSSSCG00000004710	3.569621294137351	3.069366224045476	3.03592943798565	2.2150593699704864	2.0381822178467486	1.954649418050141	ADAL	protein_coding	chr1:128089963-128125932:-	gi|545801006|ref|XP_005659746.1|	1899	0.0	PREDICTED: adenosine deaminase-like protein isoform X1 [Sus scrofa]	gi|159147668|emb|CU210852.10|	2837	0.0	Pig DNA sequence from clone CH242-452O20 on chromosome 1, complete sequence	Q6DHV7	589	0.0	Adenosine deaminase-like protein	CAC3005	112	8e-26	COG1816	pfam00962	A_deaminase	Adenosine/AMP deaminase.	GO:0006154|adenosine catabolic process;GO:0017144|drug metabolic process;GO:0046103|inosine biosynthetic process;GO:0009117|nucleotide metabolic process;GO:0043101|purine-containing compound salvage;	GO:0005829|cytosol;	GO:0004000|adenosine deaminase activity;GO:0046872|metal ion binding;	.	.
ENSSSCG00000004717	7.941109846732889	12.379082799962417	8.541851140847008	5.654126591439815	6.472958686347292	6.267142604697237	UBR1	protein_coding	chr1:128319311-128474302:+	gi|594648976|ref|XP_007173651.1|	8840	0.0	PREDICTED: E3 ubiquitin-protein ligase UBR1 isoform X1 [Balaenoptera acutorostrata scammoni]	gi|593761962|ref|XM_007119577.1|	5087	0.0	PREDICTED: Physeter catodon ubiquitin protein ligase E3 component n-recognin 1 (UBR1), transcript variant X2, mRNA	Q8IWV7	2791	0.0	E3 ubiquitin-protein ligase UBR1	.	.	.	.	pfam02207	zf-UBR	Putative zinc finger in N-recognin (UBR box). This region is found in E3 ubiquitin ligases that recognize N-recognins.	GO:0071233|cellular response to leucine;GO:0032007|negative regulation of TOR signaling;GO:0071596|ubiquitin-dependent protein catabolic process via the N-end rule pathway;	GO:0005737|cytoplasm;GO:0005829|cytosol;GO:0000502|proteasome complex;GO:0000151|ubiquitin ligase complex;	GO:0070728|leucine binding;GO:0016874|ligase activity;GO:0061630|ubiquitin protein ligase activity;GO:0008270|zinc ion binding;	K10625	UBR1; E3 ubiquitin-protein ligase UBR1 [EC:2.3.2.27]
ENSSSCG00000004716	3.32031739617116	3.750410524361947	3.5459655835672392	2.809023438066276	2.8961884422387074	2.796007748296672	TMEM62	protein_coding	chr1:128269599-128306056:-	gi|466029428|ref|XP_004273986.1|	2975	0.0	PREDICTED: transmembrane protein 62 [Orcinus orca]	gi|743738236|ref|XM_010965209.1|	1765	0.0	PREDICTED: Camelus bactrianus transmembrane protein 62 (TMEM62), mRNA	Q0P6H9	979	0.0	Transmembrane protein 62	.	.	.	.	pfam00149	Metallophos	Calcineurin-like phosphoesterase. This family includes a diverse range of phosphoesterases, including protein phosphoserine phosphatases, nucleotidases, sphingomyelin phosphodiesterases and 2'-3' cAMP phosphodiesterases as well as nucleases such as bacterial SbcD or yeast MRE11. The most conserved regions in this superfamily centre around the metal chelating residues.	.	GO:0016021|integral component of membrane;	GO:0016787|hydrolase activity;	.	.
ENSSSCG00000004714	0.6419432933243452	0.9187559512267869	0.810019189513406	0.2940096837327823	0.6823679101234338	0.36232044325494267	EPB42	protein_coding	chr1:128231851-128255893:+	gi|927096400|ref|XP_013848556.1|	3672	0.0	PREDICTED: erythrocyte membrane protein band 4.2 [Sus scrofa]	gi|927096399|ref|XM_013993102.1|	2662	0.0	PREDICTED: Sus scrofa erythrocyte membrane protein band 4.2 (EPB42), mRNA	O46510	340	6e-99	Erythrocyte membrane protein band 4.2	.	.	.	.	pfam00868	Transglut_N	Transglutaminase family.	GO:0043249|erythrocyte maturation;GO:0018149|peptide cross-linking;GO:0008360|regulation of cell shape;	GO:0005737|cytoplasm;GO:0005856|cytoskeleton;GO:0005886|plasma membrane;	GO:0003810|protein-glutamine gamma-glutamyltransferase activity;	.	.
ENSSSCG00000012560	15.123254139251973	17.372373636204305	14.90811347845114	11.607210768458646	12.743961171513968	12.011434529859416	PRPS1	protein_coding	chrX:88074965-88103409:+	gi|440900332|gb|ELR51492.1|	1707	0.0	Ribose-phosphate pyrophosphokinase 1, partial [Bos mutus]	gi|927219531|ref|XM_003135301.3|	2847	0.0	PREDICTED: Sus scrofa phosphoribosyl pyrophosphate synthetase 1 (PRPS1), mRNA	P60892	655	0.0	Ribose-phosphate pyrophosphokinase 1	SPCC1620.06c	461	6e-151	COG0462	pfam13793	Pribosyltran_N	N-terminal domain of ribose phosphate pyrophosphokinase. This family is frequently found N-terminal to the Pribosyltran, pfam00156.	GO:0006015|5-phosphoribose 1-diphosphate biosynthetic process;GO:0006167|AMP biosynthetic process;GO:0031100|organ regeneration;GO:0046101|hypoxanthine biosynthetic process;GO:0007399|nervous system development;GO:0009165|nucleotide biosynthetic process;GO:0019693|ribose phosphate metabolic process;GO:0034418|urate biosynthetic process;	GO:0043234|protein complex;GO:0002189|ribose phosphate diphosphokinase complex;	GO:0043531|ADP binding;GO:0016208|AMP binding;GO:0005524|ATP binding;GO:0030246|carbohydrate binding;GO:0019003|GDP binding;GO:0016301|kinase activity;GO:0000287|magnesium ion binding;GO:0042803|protein homodimerization activity;GO:0004749|ribose phosphate diphosphokinase activity;	K00948	PRPS, prsA; ribose-phosphate pyrophosphokinase [EC:2.7.6.1]
ENSSSCG00000026087	22.1402059724882	27.4649855616142	25.432027621800895	17.53283757137164	18.029209315284817	17.044565002476638	GKAP1	protein_coding	chr10:31141449-31230694:+	gi|545852983|ref|XP_005668085.1|	1747	0.0	PREDICTED: G kinase-anchoring protein 1 isoform X1 [Sus scrofa]	gi|545852982|ref|XM_005668028.1|	1374	0.0	PREDICTED: Sus scrofa G kinase anchoring protein 1 (GKAP1), transcript variant X1, mRNA	Q32LE2	489	1e-168	G kinase-anchoring protein 1	.	.	.	.	pfam13863	DUF4200	Domain of unknown function (DUF4200). This family is found in eukaryotes. It is a coiled-coil domain of unknwon function.	GO:0007165|signal transduction;	GO:0005794|Golgi apparatus;	.	.	.
ENSSSCG00000026084	3.0143038582781294	3.506785632798018	1.4934873095650225	1.3647537875149085	2.099542686961215	2.1490219097191146	MFSD7	protein_coding	chr8:120088-128425:-	gi|927164770|ref|XP_003356874.3|	2214	0.0	PREDICTED: major facilitator superfamily domain-containing protein 7 [Sus scrofa]	gi|927164769|ref|XM_003356826.4|	2353	0.0	PREDICTED: Sus scrofa major facilitator superfamily domain containing 7 (MFSD7), mRNA	Q6UXD7	625	0.0	Major facilitator superfamily domain-containing protein 7	.	.	.	.	pfam07690	MFS_1	Major Facilitator Superfamily.	GO:0055085|transmembrane transport;	GO:0016021|integral component of membrane;	.	K12306	MSFD7, SLC49A4; MFS transporter, FLVCR family, MFS-domain-containing protein 7
ENSSSCG00000026083	2.700902499510427	1.9136435089597073	2.517419785493983	2.7605121235494257	3.479292010698336	3.210752861519767	DNAJC24	protein_coding	chr2:29305410-29365167:-	gi|927102579|ref|XP_013849927.1|	798	6e-98	PREDICTED: dnaJ homolog subfamily C member 24 [Sus scrofa]	gi|927102578|ref|XM_013994473.1|	2174	0.0	PREDICTED: Sus scrofa DnaJ (Hsp40) homolog, subfamily C, member 24 (DNAJC24), transcript variant X1, mRNA	Q0VBY7	231	7e-71	DnaJ homolog subfamily C member 24	MG019	60.8	8e-09	COG0484	pfam00226	DnaJ	DnaJ domain. DnaJ domains (J-domains) are associated with hsp70 heat-shock system and it is thought that this domain mediates the interaction. DnaJ-domain is therefore part of a chaperone (protein folding) system. The T-antigens, although not in Prosite are confirmed as DnaJ containing domains from literature.	GO:0055114|oxidation-reduction process;GO:0017183|peptidyl-diphthamide biosynthetic process from peptidyl-histidine;GO:0032781|positive regulation of ATPase activity;	GO:0005737|cytoplasm;GO:0005856|cytoskeleton;	GO:0001671|ATPase activator activity;GO:0008198|ferrous iron binding;GO:0008270|zinc ion binding;	K17867	DPH4, DNAJC24; diphthamide biosynthesis protein 4
ENSSSCG00000026082	11.291340299164458	11.107873546966866	8.622302610170388	6.656953381222583	8.865207271795597	8.234912213344474	DNAJC3	protein_coding	chr11:65230143-65299082:+	gi|308208140|gb|ADO20319.1|	2470	0.0	P58IPK [Sus scrofa]	gi|115548799|dbj|AK231757.1|	1680	0.0	Sus scrofa mRNA, clone:LNG010019H12, expressed in lung	Q13217	930	0.0	DnaJ homolog subfamily C member 3	.	.	.	.	pfam00226	DnaJ	DnaJ domain. DnaJ domains (J-domains) are associated with hsp70 heat-shock system and it is thought that this domain mediates the interaction. DnaJ-domain is therefore part of a chaperone (protein folding) system. The T-antigens, although not in Prosite are confirmed as DnaJ containing domains from literature.	GO:0070417|cellular response to cold;GO:0051607|defense response to virus;GO:0036498|IRE1-mediated unfolded protein response;GO:0043066|negative regulation of apoptotic process;GO:1903912|negative regulation of endoplasmic reticulum stress-induced eIF2 alpha phosphorylation;GO:0036494|positive regulation of translation initiation in response to endoplasmic reticulum stress;GO:0051603|proteolysis …	GO:0005737|cytoplasm;GO:0005829|cytosol;GO:0005783|endoplasmic reticulum;GO:0005788|endoplasmic reticulum lumen;GO:0031205|endoplasmic reticulum Sec complex;GO:0070062|extracellular exosome;GO:1903561|extracellular vesicle;GO:0016020|membrane;GO:0005790|smooth endoplasmic reticulum;	GO:0019901|protein kinase binding;GO:0004860|protein kinase inhibitor activity;	K09523	DNAJC3; DnaJ homolog subfamily C member 3
ENSSSCG00000022741	14.773550508203185	13.854894619440682	10.67044366380754	8.523616397516266	10.473727049894334	6.9708425784856285	PDGFRB	protein_coding	chr2:151155754-151192816:-	gi|466061233|ref|XP_004280405.1|	5113	0.0	PREDICTED: platelet-derived growth factor receptor beta [Orcinus orca]	gi|371910239|dbj|AK394805.1|	3124	0.0	Sus scrofa mRNA, clone: OVR010017C05, expressed in ovary	Q6QNF3	1938	0.0	Platelet-derived growth factor receptor beta	.	.	.	.	pfam07714	Pkinase_Tyr	Protein tyrosine kinase.	GO:0016477|cell migration;GO:0060981|cell migration involved in coronary angiogenesis;GO:0035441|cell migration involved in vasculogenesis;GO:0006935|chemotaxis;GO:0018108|peptidyl-tyrosine phosphorylation;GO:0046488|phosphatidylinositol metabolic process;GO:0048015|phosphatidylinositol-mediated signaling;GO:0048008|platelet-derived growth factor receptor signaling pathway;GO:0008284|positive reg…	GO:0016324|apical plasma membrane;GO:0005737|cytoplasm;GO:0016023|cytoplasmic membrane-bounded vesicle;GO:0016021|integral component of membrane;GO:0031226|intrinsic component of plasma membrane;GO:0043202|lysosomal lumen;GO:0005634|nucleus;GO:0005886|plasma membrane;	GO:0005524|ATP binding;GO:0005019|platelet-derived growth factor beta-receptor activity;	K05089	PDGFRB; platelet-derived growth factor receptor beta [EC:2.7.10.1]
ENSSSCG00000022742	24.73759887984267	28.440326782775035	26.231120498651894	23.119374298876536	17.75230406357399	14.283749140982096	PRDX6	protein_coding	chr9:115857527-115872531:+	gi|47523870|ref|NP_999573.1|	1180	3e-158	peroxiredoxin-6 [Sus scrofa]	gi|371910072|dbj|AK391283.1|	1737	0.0	Sus scrofa mRNA, clone: DCI010026A09, expressed in dendritic cells (immature)	Q9TSX9	457	6e-147	Peroxiredoxin-6	mll2432	226	2e-65	COG0450	pfam00578	AhpC-TSA	AhpC/TSA family. This family contains proteins related to alkyl hydroperoxide reductase (AhpC) and thiol specific antioxidant (TSA).	GO:0045454|cell redox homeostasis;GO:0016042|lipid catabolic process;	GO:0005737|cytoplasm;GO:0016023|cytoplasmic membrane-bounded vesicle;GO:0070062|extracellular exosome;GO:0005615|extracellular space;GO:0005764|lysosome;GO:0016020|membrane;	GO:0004602|glutathione peroxidase activity;GO:0016787|hydrolase activity;GO:0051920|peroxiredoxin activity;	K11188	PRDX6; peroxiredoxin 6, 1-Cys peroxiredoxin [EC:1.11.1.7 1.11.1.15 3.1.1.-]
ENSSSCG00000022747	0.0	0.0	0.5575417584225218	0.0	0.0	1.1486946014000328	U6	snRNA	chr15:54531275-54531380:-	.	.	.	.	gi|937346898|ref|NG_044890.1|	78	1e-31	Homo sapiens RNA, U6 small nuclear 698, pseudogene (RNU6-698P) on chromosome 19	.	.	.	.	.	.	.	.	pfam06011	TRP	Transient receptor potential (TRP) ion channel. This family of proteins are transient receptor potential (TRP) ion channels. They are essential for cellular viability and are involved in cell growth and cell wall synthesis. The genes for these proteins are homologous to polycystic kidney disease related ion channel genes.	.	.	.	.	.
ENSSSCG00000009528	9.767063585919848	12.859691822311257	10.41156585715139	13.614038513640976	13.013412175423491	14.427785116753364	TPP2	protein_coding	chr11:70943108-71009377:+	gi|958665007|ref|XP_014694925.1|	6401	0.0	PREDICTED: tripeptidyl-peptidase 2 isoform X1 [Equus asinus]	gi|743724767|ref|XM_010958025.1|	3240	0.0	PREDICTED: Camelus bactrianus tripeptidyl peptidase II (TPP2), mRNA	P29144	150	6e-35	Tripeptidyl-peptidase 2	SPAP8A3.12c	647	0.0	COG1404	pfam12580	TPPII	Tripeptidyl peptidase II. This domain family is found in bacteria and eukaryotes, and is approximately 190 amino acids in length. The family is found in association with pfam00082. Tripeptidyl peptidase II (TPPII) is a crucial component of the proteolytic cascade acting downstream of the 26S proteasome in the ubiquitin-proteasome pathway. It is an amino peptidase belonging to the subtilase family…	GO:0006508|proteolysis;	GO:0005737|cytoplasm;GO:0005634|nucleus;	GO:0004177|aminopeptidase activity;GO:0042277|peptide binding;GO:0004252|serine-type endopeptidase activity;GO:0008240|tripeptidyl-peptidase activity;	K01280	TPP2; tripeptidyl-peptidase II [EC:3.4.14.10]
ENSSSCG00000009527	0.03875253730358497	0.0	0.0	0.0	0.0	0.0	FGF14	protein_coding	chr11:70252397-70422164:-	gi|194040705|ref|XP_001924930.1|	1252	2e-167	PREDICTED: fibroblast growth factor 14 isoform X1 [Sus scrofa]	gi|927191443|ref|XM_001924895.5|	1701	0.0	PREDICTED: Sus scrofa fibroblast growth factor 14 (FGF14), transcript variant X1, mRNA	Q8R5L7	484	6e-168	Fibroblast growth factor 14	.	.	.	.	pfam00167	FGF	Fibroblast growth factor. Fibroblast growth factors are a family of proteins involved in growth and differentiation in a wide range of contexts. They are found in a wide range of organisms, from nematodes to humans. Most share an internal core region of high similarity, conserved residues in which are involved in binding with their receptors. On binding, they cause dimerization of their tyrosine …	GO:0007399|nervous system development;GO:0002230|positive regulation of defense response to virus by host;GO:1901843|positive regulation of high voltage-gated calcium channel activity;GO:0060078|regulation of postsynaptic membrane potential;GO:0048167|regulation of synaptic plasticity;GO:1903421|regulation of synaptic vesicle recycling;GO:0098792|xenophagy;	GO:0005576|extracellular region;GO:0005634|nucleus;	GO:0008083|growth factor activity;	K04358	FGF; fibroblast growth factor
ENSSSCG00000009526	7.703588485578491	5.492147328737252	3.1494645702962574	3.591809060655209	4.445481903628098	1.7303447473595106	ITGBL1	protein_coding	chr11:70041968-70248362:+	gi|338715409|ref|XP_003363266.1|	1927	0.0	PREDICTED: integrin beta-like protein 1 [Equus caballus]	gi|955500511|ref|XM_004423149.2|	2057	0.0	PREDICTED: Ceratotherium simum simum integrin beta like 1 (LOC101404168), mRNA	O95965	162	5e-40	Integrin beta-like protein 1	.	.	.	.	pfam07974	EGF_2	EGF-like domain. This family contains EGF domains found in a variety of extracellular proteins.	GO:0007155|cell adhesion;	GO:0005576|extracellular region;	.	.	.
ENSSSCG00000009524	3.5653796679196423	3.876552305739174	3.023115312335452	1.9763716307325763	1.4278226647677132	1.2125109681444788	TMTC4	protein_coding	chr11:69361229-69442499:-	gi|545855663|ref|XP_005668568.1|	3726	0.0	PREDICTED: transmembrane and TPR repeat-containing protein 4 isoform X2 [Sus scrofa]	gi|927191340|ref|XM_005668511.2|	3472	0.0	PREDICTED: Sus scrofa transmembrane and tetratricopeptide repeat containing 4 (TMTC4), transcript variant X2, mRNA	Q5T4D3	99.8	2e-20	Transmembrane and TPR repeat-containing protein 4	.	.	.	.	pfam08409	DUF1736	Domain of unknown function (DUF1736). This domain of unknown function is found in various hypothetical metazoan proteins.	.	GO:0016021|integral component of membrane;	.	.	.
ENSSSCG00000009523	1.8133594351492397	2.10429646821666	1.5818433830039729	0.948605351005948	0.9846137706855421	0.5431745475765211	GGACT	protein_coding	chr11:69287675-69348844:-	gi|335297072|ref|XP_003131117.2|	765	3e-97	PREDICTED: gamma-glutamylaminecyclotransferase [Sus scrofa]	gi|927191365|ref|XM_005668516.2|	1335	0.0	PREDICTED: Sus scrofa gamma-glutamylamine cyclotransferase (GGACT), transcript variant X1, mRNA	Q0VFX9	241	7e-76	Gamma-glutamylaminecyclotransferase	MJ1514	57.8	3e-09	COG2105	pfam06094	AIG2	AIG2-like family. AIG2 is an Arabidopsis proteins that exhibit RPS2- and avrRpt2-dependent induction early after infection with Pseudomonas syringae pv maculicola strain ES4326 carrying avrRpt2.	GO:0042219|cellular modified amino acid catabolic process;	GO:0070062|extracellular exosome;	GO:0003839|gamma-glutamylcyclotransferase activity;	.	.
ENSSSCG00000009522	3.335341456787319	2.7200779627240492	2.566026376712475	2.762576609111909	2.2745499800708457	2.6121511593888265	PCCA	protein_coding	chr11:68920906-69301332:+	gi|560938941|ref|XP_006195259.1|	3607	0.0	PREDICTED: propionyl-CoA carboxylase alpha chain, mitochondrial [Camelus ferus]	gi|927191415|ref|XR_001299662.1|	2503	0.0	PREDICTED: Sus scrofa uncharacterized LOC106505339 (LOC106505339), ncRNA	P05165	1208	0.0	Propionyl-CoA carboxylase alpha chain, mitochondrial	BMEI0800	641	0.0	COG4770	pfam02786	CPSase_L_D2	Carbamoyl-phosphate synthase L chain, ATP binding domain. Carbamoyl-phosphate synthase catalyses the ATP-dependent synthesis of carbamyl-phosphate from glutamine or ammonia and bicarbonate. This important enzyme initiates both the urea cycle and the biosynthesis of arginine and/or pyrimidines. The carbamoyl-phosphate synthase (CPS) enzyme in prokaryotes is a heterodimer of a small and large chain…	GO:0006768|biotin metabolic process;GO:0019626|short-chain fatty acid catabolic process;	GO:0005829|cytosol;GO:0005759|mitochondrial matrix;	GO:0005524|ATP binding;GO:0009374|biotin binding;GO:0004075|biotin carboxylase activity;GO:0019899|enzyme binding;GO:0046872|metal ion binding;GO:0004658|propionyl-CoA carboxylase activity;	K01965	PCCA, pccA; propionyl-CoA carboxylase alpha chain [EC:6.4.1.3]
ENSSSCG00000009521	0.020341942895663642	0.029113601293539137	0.036475498468006365	0.010936877000317168	0.009730314410416191	0.0	ZIC5	protein_coding	chr11:68819593-68830341:-	gi|803228881|ref|XP_011974710.1|	1414	1e-170	PREDICTED: zinc finger protein ZIC 5 isoform X2 [Ovis aries musimon]	gi|927191321|ref|XM_005653825.2|	3413	0.0	PREDICTED: Sus scrofa Zic family member 5 (ZIC5), mRNA	Q7TQ40	123	4e-27	Zinc finger protein ZIC 5	.	.	.	.	pfam13465	zf-H2C2_2	Zinc-finger double domain.	GO:0030154|cell differentiation;GO:0030900|forebrain development;GO:0001843|neural tube closure;	GO:0005634|nucleus;	GO:0003677|DNA binding;GO:0046872|metal ion binding;GO:0000977|RNA polymerase II regulatory region sequence-specific DNA binding;GO:0003700|transcription factor activity, sequence-specific DNA binding;	K09226	ZIC5; zinc finger protein ZIC 5
ENSSSCG00000009520	0.16068867648444807	0.13628403754671517	0.11205200020300954	0.134391467733854	0.10248456288283965	0.04946978375476847	ZIC2	protein_coding	chr11:68840830-68846470:+	gi|149050259|gb|EDM02583.1|	1770	0.0	Zic family member 2 (odd-paired homolog, Drosophila) (predicted) [Rattus norvegicus]	gi|927191315|ref|XM_003357883.3|	2318	0.0	PREDICTED: Sus scrofa Zic family member 2 (ZIC2), partial mRNA	Q62520	679	0.0	Zinc finger protein ZIC 2	.	.	.	.	pfam13465	zf-H2C2_2	Zinc-finger double domain.	GO:0030154|cell differentiation;GO:0007417|central nervous system development;GO:0044782|cilium organization;GO:0048066|developmental pigmentation;GO:0045892|negative regulation of transcription, DNA-templated;GO:0007399|nervous system development;GO:0001843|neural tube closure;GO:1900224|positive regulation of nodal signaling pathway involved in determination of lateral mesoderm left/right asymm…	GO:0005737|cytoplasm;GO:0005634|nucleus;	GO:0031490|chromatin DNA binding;GO:0003677|DNA binding;GO:0046872|metal ion binding;GO:0000978|RNA polymerase II core promoter proximal region sequence-specific DNA binding;GO:0000977|RNA polymerase II regulatory region sequence-specific DNA binding;GO:0003700|transcription factor activity, sequence-specific DNA binding;GO:0001077|transcriptional activator activity, RNA polymerase II core promot…	.	.
ENSSSCG00000002712	21.4153876280632	17.977705493813758	14.972752939067519	7.575010669605539	10.387555693097305	12.838929115676626	LDHD	protein_coding	chr6:12548131-12555648:+	gi|927136645|ref|XP_005664401.2|	2421	0.0	PREDICTED: probable D-lactate dehydrogenase, mitochondrial [Sus scrofa]	gi|927136644|ref|XM_005664344.2|	1998	0.0	PREDICTED: Sus scrofa lactate dehydrogenase D (LDHD), mRNA	Q86WU2	717	0.0	Probable D-lactate dehydrogenase, mitochondrial	RSc2664	447	2e-149	COG0277	pfam02913	FAD-oxidase_C	FAD linked oxidases, C-terminal domain. This domain has a ferredoxin-like fold.	.	GO:0005743|mitochondrial inner membrane;GO:0005739|mitochondrion;	GO:0004458|D-lactate dehydrogenase (cytochrome) activity;GO:0050660|flavin adenine dinucleotide binding;	K00102	dld, LDHD; D-lactate dehydrogenase (cytochrome) [EC:1.1.2.4]
ENSSSCG00000002715	1.0415328508229211	0.9153130629826681	0.7986408971998287	0.5452453833773505	0.6293106131616533	0.569571023771118	RFWD3	protein_coding	chr6:12952241-12994052:+	gi|350584864|ref|XP_003481836.1|	3606	0.0	PREDICTED: E3 ubiquitin-protein ligase RFWD3 isoform X1 [Sus scrofa]	gi|927136710|ref|XM_003481788.3|	4784	0.0	PREDICTED: Sus scrofa ring finger and WD repeat domain 3 (RFWD3), transcript variant X1, mRNA	D2HWM5	1135	0.0	E3 ubiquitin-protein ligase RFWD3	.	.	.	.	pfam13639	zf-RING_2	Ring finger domain.	GO:0006281|DNA repair;GO:0031571|mitotic G1 DNA damage checkpoint;GO:0016567|protein ubiquitination;GO:0010212|response to ionizing radiation;	GO:0005737|cytoplasm;GO:0005634|nucleus;GO:0016605|PML body;	GO:0016874|ligase activity;GO:0097371|MDM2/MDM4 family protein binding;GO:0002039|p53 binding;GO:0004842|ubiquitin-protein transferase activity;GO:0008270|zinc ion binding;	K15691	RFWD3; E3 ubiquitin-protein ligase RFWD3 [EC:2.3.2.27]
ENSSSCG00000002714	3.294196460125795	4.413404345374483	3.3972223353699595	2.2391485707832155	1.992124406695157	2.5380142500638216	WDR59	protein_coding	chr6:12682184-12771481:+	gi|594627459|ref|XP_007198335.1|	4857	0.0	PREDICTED: WD repeat-containing protein 59 isoform X1 [Balaenoptera acutorostrata scammoni]	gi|594627458|ref|XM_007198273.1|	2584	0.0	PREDICTED: Balaenoptera acutorostrata scammoni WD repeat domain 59 (WDR59), transcript variant X1, mRNA	Q6PJI9	71.6	3e-11	WD repeat-containing protein 59	SPAC11E3.05	243	8e-65	COG2319	pfam00400	WD40	WD domain, G-beta repeat.	GO:0034198|cellular response to amino acid starvation;GO:0032008|positive regulation of TOR signaling;	GO:0061700|GATOR2 complex;	.	.	.
ENSSSCG00000002716	0.39559167817895224	0.49664468831182124	0.18666906630697194	0.47015789533170144	0.6373939880622347	0.8653305825455079	MLKL	protein_coding	chr6:12924904-12948362:+	gi|942050778|ref|XP_014333273.1|	1787	0.0	PREDICTED: mixed lineage kinase domain-like protein [Bos mutus]	gi|371913827|dbj|AK393094.1|	1597	0.0	Sus scrofa mRNA, clone: ITT010101A12, expressed in intestine	Q8NB16	553	0.0	Mixed lineage kinase domain-like protein	.	.	.	.	pfam07714	Pkinase_Tyr	Protein tyrosine kinase.	GO:0070266|necroptotic process;GO:0070207|protein homotrimerization;GO:0006468|protein phosphorylation;	GO:0005737|cytoplasm;GO:0005829|cytosol;GO:0005886|plasma membrane;	GO:0005524|ATP binding;GO:0032403|protein complex binding;	K08849	MLKL; mixed lineage kinase domain-like [EC:2.7.11.1]
ENSSSCG00000002719	3.1389555215903826	2.38064417968508	4.762591137880297	3.029141018763058	4.619939025194677	4.237126240329058	EXOSC6	protein_coding	chr6:13296055-13296873:-	gi|927136784|ref|XP_013849926.1|	863	8e-113	PREDICTED: exosome complex component MTR3 [Sus scrofa]	gi|927136783|ref|XM_013994472.1|	819	0.0	PREDICTED: Sus scrofa exosome component 6 (EXOSC6), mRNA	Q8BTW3	303	4e-101	Exosome complex component MTR3	.	.	.	.	pfam01138	RNase_PH	3' exoribonuclease family, domain 1. This family includes 3'-5' exoribonucleases. Ribonuclease PH contains a single copy of this domain, and removes nucleotide residues following the -CCA terminus of tRNA. Polyribonucleotide nucleotidyltransferase (PNPase) contains two tandem copies of the domain. PNPase is involved in mRNA degradation in a 3'-5' direction. The exosome is a 3'-5' exoribonuclease …	GO:0045006|DNA deamination;GO:0045190|isotype switching;GO:0071028|nuclear mRNA surveillance;GO:0034427|nuclear-transcribed mRNA catabolic process, exonucleolytic, 3'-5';GO:0071051|polyadenylation-dependent snoRNA 3'-end processing;GO:0045830|positive regulation of isotype switching;GO:0031125|rRNA 3'-end processing;GO:0016075|rRNA catabolic process;GO:0034475|U4 snRNA 3'-end processing;	GO:0000177|cytoplasmic exosome (RNase complex);GO:0000178|exosome (RNase complex);GO:0000176|nuclear exosome (RNase complex);GO:0005730|nucleolus;	GO:0044822|poly(A) RNA binding;	K12587	MTR3, EXOSC6; exosome complex component MTR3
ENSSSCG00000002718	0.12072905852270703	0.0	0.0	0.0	0.0	0.05575166105696129	FA2H	protein_coding	chr6:12855421-12909499:+	gi|335289141|ref|XP_003126916.2|	1831	0.0	PREDICTED: fatty acid 2-hydroxylase [Sus scrofa]	gi|371912752|dbj|AK392409.1|	1024	0.0	Sus scrofa mRNA, clone: HTMT10072B04, expressed in hypothalamus	Q7L5A8	626	0.0	Fatty acid 2-hydroxylase	YMR272c_2	111	3e-28	COG3000	pfam04116	FA_hydroxylase	Fatty acid hydroxylase superfamily. This superfamily includes fatty acid and carotene hydroxylases and sterol desaturases. Beta-carotene hydroxylase is involved in zeaxanthin synthesis by hydroxylating beta-carotene, but the enzyme may be involved in other pathways. This family includes C-5 sterol desaturase and C-4 sterol methyl oxidase. Members of this family are involved in cholesterol biosynt…	GO:0032286|central nervous system myelin maintenance;GO:0006633|fatty acid biosynthetic process;GO:0006631|fatty acid metabolic process;GO:0030258|lipid modification;GO:0032287|peripheral nervous system myelin maintenance;GO:0042127|regulation of cell proliferation;GO:0042634|regulation of hair cycle;GO:0001949|sebaceous gland cell differentiation;GO:0030148|sphingolipid biosynthetic process;	GO:0005783|endoplasmic reticulum;GO:0005789|endoplasmic reticulum membrane;GO:0016021|integral component of membrane;GO:0031090|organelle membrane;	GO:0080132|fatty acid alpha-hydroxylase activity;GO:0020037|heme binding;GO:0005506|iron ion binding;	.	.
ENSSSCG00000026554	20.228076032909698	11.499272745771098	11.845249839241063	17.370628673004603	8.03839648287145	8.779379168125228	ENSSSCG00000026554	protein_coding	chr6:64432027-64436642:+	gi|164664450|ref|NP_001106912.1|	953	1e-120	prostamide/prostaglandin F synthase [Sus scrofa]	gi|371912955|dbj|AK392612.1|	887	0.0	Sus scrofa mRNA, clone: HTMT10089F10, expressed in hypothalamus	A9CQL8	371	5e-122	Prostamide/prostaglandin F synthase	.	.	.	.	pfam13911	AhpC-TSA_2	AhpC/TSA antioxidant enzyme. This family contains proteins related to alkyl hydro-peroxide reductase (AhpC) and thiol specific antioxidant (TSA).	GO:0001516|prostaglandin biosynthetic process;	GO:0005737|cytoplasm;GO:0005829|cytosol;GO:0005783|endoplasmic reticulum;GO:0043209|myelin sheath;	GO:0016616|oxidoreductase activity, acting on the CH-OH group of donors, NAD or NADP as acceptor;GO:0047017|prostaglandin-F synthase activity;	K15717	K15717; prostamide/prostaglandin F2alpha synthase [EC:1.11.1.20]
ENSSSCG00000002888	1.3480177086584466	1.4148178253699377	1.692008117584913	0.8697165624423995	1.031691905012799	1.6185083443039316	GAPDHS	protein_coding	chr6:44972131-44978847:+	gi|744560770|ref|XP_010977119.1|	1534	0.0	PREDICTED: glyceraldehyde-3-phosphate dehydrogenase, testis-specific [Camelus dromedarius]	gi|927138823|ref|XM_013998318.1|	739	0.0	PREDICTED: Sus scrofa glyceraldehyde-3-phosphate dehydrogenase, spermatogenic (GAPDHS), mRNA	Q2KJE5	586	0.0	Glyceraldehyde-3-phosphate dehydrogenase, testis-specific	SPBC32F12.11	442	2e-154	COG0057	pfam02800	Gp_dh_C	Glyceraldehyde 3-phosphate dehydrogenase, C-terminal domain. GAPDH is a tetrameric NAD-binding enzyme involved in glycolysis and glyconeogenesis. C-terminal domain is a mixed alpha/antiparallel beta fold.	GO:0006006|glucose metabolic process;GO:0006096|glycolytic process;	GO:0005737|cytoplasm;GO:0005634|nucleus;	GO:0004365|glyceraldehyde-3-phosphate dehydrogenase (NAD+) (phosphorylating) activity;GO:0051287|NAD binding;GO:0050661|NADP binding;	K10705	GAPDHS; glyceraldehyde-3-phosphate dehydrogenase, spermatogenic [EC:1.2.1.12]
ENSSSCG00000039950	0.9859539779354407	0.873542823997348	0.915535985785701	1.666027560319682	1.2127339941136026	0.9431322662135951	RMI1	protein_coding	chr10:30952721-30954592:-	gi|545852973|ref|XP_005668084.1|	3163	0.0	PREDICTED: recQ-mediated genome instability protein 1 [Sus scrofa]	gi|927185712|ref|XM_013980148.1|	1872	0.0	PREDICTED: Sus scrofa RecQ mediated genome instability 1 (RMI1), transcript variant X2, mRNA	A4IF98	1016	0.0	RecQ-mediated genome instability protein 1	.	.	.	.	pfam08585	DUF1767	Domain of unknown function (DUF1767). Eukaryotic domain of unknown function. This domain is found to the N-terminus of the nucleic acid binding domain.	GO:0006260|DNA replication;	GO:0005634|nucleus;	GO:0000166|nucleotide binding;	K10990	RMI1, BRAP75; RecQ-mediated genome instability protein 1
ENSSSCG00000039953	31.07454259772287	31.57437635151695	27.45354137059966	19.372704297649346	39.04917145459031	32.888638954106135	PNRC1	protein_coding	chr1:57128364-57134034:+	gi|743707755|ref|XP_010947247.1|	1255	5e-159	PREDICTED: proline-rich nuclear receptor coactivator 1 [Camelus bactrianus]	gi|371911402|dbj|AK396731.1|	1614	0.0	Sus scrofa mRNA, clone: PST010082C06, expressed in prostate	Q12796	347	3e-108	Proline-rich nuclear receptor coactivator 1	.	.	.	.	pfam15365	PNRC	Proline-rich nuclear receptor coactivator. The PNRC family, proline-rich nuclear receptor coactivator, is found in eukaryotes, and is approximately 60 amino acids in length. There is a conserved YAG sequence motif.	GO:0006355|regulation of transcription, DNA-templated;GO:0006351|transcription, DNA-templated;	GO:0005634|nucleus;	.	K18774	PNRC1; proline-rich nuclear receptor coactivator 1
ENSSSCG00000039952	25.252391802189496	26.592715039293324	21.87550239636726	18.856334474187516	18.066561433824795	20.739416583086474	ZFAND3	protein_coding	chr7:33378286-33718030:+	gi|345778717|ref|XP_538897.3|	910	4e-111	PREDICTED: AN1-type zinc finger protein 3 isoform X2 [Canis lupus familiaris]	gi|111153774|emb|CT737349.5|	2224	0.0	Pig DNA sequence from clone CH242-21M14 on chromosome 7, complete sequence	Q9H8U3	353	2e-112	AN1-type zinc finger protein 3	.	.	.	.	pfam01428	zf-AN1	AN1-like Zinc finger. Zinc finger at the C-terminus of An1, a ubiquitin-like protein in Xenopus laevis. The following pattern describes the zinc finger. C-X2-C-X(9-12)-C-X(1-2)-C-X4-C-X2-H-X5-H-X-C Where X can be any amino acid, and numbers in brackets indicate the number of residues.	.	.	GO:0003677|DNA binding;GO:0008270|zinc ion binding;	.	.
ENSSSCG00000005312	0.4123745133149705	0.3344436711206612	0.0924295064009811	0.11085689683931116	0.11835251991349516	0.6665087537056805	SIT1	protein_coding	chr1:236369953-236373335:-	gi|545803647|ref|XP_005660278.1|	801	2e-96	PREDICTED: signaling threshold-regulating transmembrane adapter 1 [Sus scrofa]	gi|927098510|ref|XM_005660221.2|	1088	0.0	PREDICTED: Sus scrofa signaling threshold regulating transmembrane adaptor 1 (SIT1), mRNA	Q9Y3P8	251	4e-75	Signaling threshold-regulating transmembrane adapter 1	.	.	.	.	pfam15330	SIT	SHP2-interacting transmembrane adaptor protein, SIT. SIT, or SHP2-interacting transmembrane adaptor protein, is a disulfide-linked dimer that regulates human T Cell activation.	GO:0002250|adaptive immune response;GO:0050863|regulation of T cell activation;GO:0007165|signal transduction;GO:0043029|T cell homeostasis;	GO:0070062|extracellular exosome;GO:0005887|integral component of plasma membrane;GO:0005886|plasma membrane;	GO:0019900|kinase binding;GO:0042169|SH2 domain binding;	.	.
ENSSSCG00000039959	0.0	0.0	0.0	0.0	0.035749528171149285	0.0	ENSSSCG00000039959	protein_coding	chr7:63095125-63099181:-	gi|744591759|ref|XP_010987427.1|	1861	0.0	PREDICTED: SUMO-activating enzyme subunit 2 [Camelus dromedarius]	gi|371920105|dbj|AK390575.1|	452	0.0	Sus scrofa mRNA, clone: BFLT10095A07, expressed in brain (frontal lobe)	Q9UBT2	662	0.0	SUMO-activating enzyme subunit 2	SPBC16H5.03c	205	2e-57	COG0476	pfam02134	UBACT	Repeat in ubiquitin-activating (UBA) protein.	GO:0016925|protein sumoylation;	GO:0005829|cytosol;GO:0005654|nucleoplasm;GO:0031510|SUMO activating enzyme complex;	GO:0005524|ATP binding;GO:0008047|enzyme activator activity;GO:0046872|metal ion binding;GO:0046982|protein heterodimerization activity;GO:0019948|SUMO activating enzyme activity;	K10685	UBLE1B, SAE2, UBA2; ubiquitin-like 1-activating enzyme E1 B [EC:6.2.1.45]
ENSSSCG00000012435	13.01386709809575	12.271704934544454	8.545905830320518	9.032820514320054	13.511834543857994	13.225346823778388	MAGT1	protein_coding	chrX:61894241-61958576:-	gi|927219106|ref|XP_003135253.4|	1855	0.0	PREDICTED: magnesium transporter protein 1 [Sus scrofa]	gi|927219105|ref|XM_003135205.5|	2968	0.0	PREDICTED: Sus scrofa magnesium transporter 1 (MAGT1), mRNA	Q9H0U3	629	0.0	Magnesium transporter protein 1	.	.	.	.	pfam04756	OST3_OST6	OST3 / OST6 family. The proteins in this family are part of a complex of eight ER proteins that transfers core oligosaccharide from dolichol carrier to Asn-X-Ser/Thr motifs. This family includes both OST3 and OST6, each of which contains four predicted transmembrane helices. Disruption of OST3 and OST6 leads to a defect in the assembly of the complex. Hence, the function of these genes seems to b…	GO:0050890|cognition;GO:0015693|magnesium ion transport;GO:0006487|protein N-linked glycosylation;GO:0018279|protein N-linked glycosylation via asparagine;GO:0055085|transmembrane transport;	GO:0005887|integral component of plasma membrane;GO:0016020|membrane;GO:0008250|oligosaccharyltransferase complex;GO:0005886|plasma membrane;	GO:0015095|magnesium ion transmembrane transporter activity;	K19478	MAGT1; magnesium transporter 1
ENSSSCG00000000798	3.8336187729248934	4.235359146653808	2.858190808099295	1.9309730901977178	3.242866290963095	3.074788579505138	TWF1	protein_coding	chr5:74868591-74893713:-	gi|390467518|ref|XP_003733773.1|	1946	0.0	PREDICTED: twinfilin-1 isoform X1 [Callithrix jacchus]	gi|927133696|ref|XM_005664155.2|	3142	0.0	PREDICTED: Sus scrofa twinfilin actin binding protein 1 (TWF1), mRNA	Q56JV6	634	0.0	Twinfilin-1	.	.	.	.	pfam00241	Cofilin_ADF	Cofilin/tropomyosin-type actin-binding protein. Severs actin filaments and binds to actin monomers.	GO:0051016|barbed-end actin filament capping;GO:0043538|regulation of actin phosphorylation;GO:0042989|sequestering of actin monomers;	GO:0015629|actin cytoskeleton;GO:0005911|cell-cell junction;GO:0030175|filopodium;GO:0005925|focal adhesion;GO:0030016|myofibril;GO:0048471|perinuclear region of cytoplasm;GO:0032587|ruffle membrane;	GO:0005524|ATP binding;GO:0005546|phosphatidylinositol-4,5-bisphosphate binding;GO:0004713|protein tyrosine kinase activity;	K08870	TWF; twinfilin
ENSSSCG00000014114	8.936041189263277	6.81723357658844	5.0293629507149555	4.211853707964186	7.81451167302823	6.980660653237822	PAPD4	protein_coding	chr2:88328250-88502342:+	gi|311249764|ref|XP_003123800.1|	2585	0.0	PREDICTED: poly(A) RNA polymerase GLD2 isoform X1 [Sus scrofa]	gi|927105279|ref|XM_003123752.5|	2812	0.0	PREDICTED: Sus scrofa PAP associated domain containing 4 (PAPD4), transcript variant X1, mRNA	Q6PIY7	834	0.0	Poly(A) RNA polymerase GLD2	SPAC821.04c	129	5e-30	COG5260	pfam03828	PAP_assoc	Cid1 family poly A polymerase. This domain is found in poly(A) polymerases and has been shown to have polynucleotide adenylyltransferase activity. Proteins in this family have been located to both the nucleus and the cytoplasm.	GO:1990603|dark adaptation;GO:0002244|hematopoietic progenitor cell differentiation;GO:0021766|hippocampus development;GO:0071044|histone mRNA catabolic process;GO:0006397|mRNA processing;GO:0030182|neuron differentiation;GO:0060041|retina development in camera-type eye;GO:0043631|RNA polyadenylation;	GO:0005829|cytosol;GO:0031380|nuclear RNA-directed RNA polymerase complex;	GO:0005524|ATP binding;GO:0046872|metal ion binding;GO:0004652|polynucleotide adenylyltransferase activity;	K14079	PAPD4, GLD2; poly(A) RNA polymerase GLD2 [EC:2.7.7.19]
ENSSSCG00000014116	3.3344651394182763	1.4825578829851755	1.4540980685080154	1.4512983621554734	1.5841494293376586	0.9427517633651336	MTX3	protein_coding	chr2:88667294-88680947:-	gi|927105288|ref|XP_013850395.1|	1700	0.0	PREDICTED: metaxin-3 isoform X2 [Sus scrofa]	gi|927105289|ref|XM_003123753.3|	4165	0.0	PREDICTED: Sus scrofa metaxin 3 (MTX3), transcript variant X3, mRNA	Q5HYI7	513	0.0	Metaxin-3	.	.	.	.	pfam11801	Tom37_C	Tom37 C-terminal domain. The TOM37 protein is one of the outer membrane proteins that make up the TOM complex for guiding cytosolic mitochondrial beta-barrel proteins from the cytosol across the outer mitochondrial membrane into the intramembrane space. In conjunction with TOM70 it guides peptides without an MTS into TOM40, the protein that forms the passage through the outer membrane. It has hom…	GO:0006626|protein targeting to mitochondrion;	GO:0005741|mitochondrial outer membrane;	.	K17776	MTX; metaxin
ENSSSCG00000014117	69.5249850275191	125.83138230655375	54.95549544650406	13.330999511015035	10.744537090705052	11.888913849614754	THBS4	protein_coding	chr2:88731122-88780596:+	gi|927105296|ref|XP_013850398.1|	4387	0.0	PREDICTED: thrombospondin-4 [Sus scrofa]	gi|927105295|ref|XM_013994944.1|	2714	0.0	PREDICTED: Sus scrofa thrombospondin-4 (LOC100513005), mRNA	Q3SWW8	1650	0.0	Thrombospondin-4	.	.	.	.	pfam05735	TSP_C	Thrombospondin C-terminal region. This region is found at the C-terminus of thrombospondin and related proteins.	GO:0048266|behavioral response to pain;GO:0071603|endothelial cell-cell adhesion;GO:0051451|myoblast migration;GO:0016525|negative regulation of angiogenesis;GO:0051781|positive regulation of cell division;GO:0001938|positive regulation of endothelial cell proliferation;GO:0090023|positive regulation of neutrophil chemotaxis;GO:0050731|positive regulation of peptidyl-tyrosine phosphorylation;GO:0…	GO:0005604|basement membrane;GO:0005783|endoplasmic reticulum;GO:0070062|extracellular exosome;GO:0031012|extracellular matrix;GO:0005615|extracellular space;GO:0016529|sarcoplasmic reticulum;	GO:0005509|calcium ion binding;GO:0008201|heparin binding;	K04659	THBS2S; thrombospondin 2/3/4/5
ENSSSCG00000014111	0.0	0.0	0.01586987819355191	0.0	0.0	0.0	BHMT2	protein_coding	chr2:87866548-87884229:+	gi|325652130|ref|NP_001191700.1|	1840	0.0	S-methylmethionine--homocysteine S-methyltransferase BHMT2 [Sus scrofa]	gi|115551280|dbj|AK232714.1|	2007	0.0	Sus scrofa mRNA, clone:LVRM10011D02, expressed in liver	Q9H2M3	553	0.0	S-methylmethionine--homocysteine S-methyltransferase BHMT2	BS_yitJ_1	87.8	1e-17	COG0646	pfam02574	S-methyl_trans	Homocysteine S-methyltransferase. This is a family of related homocysteine S-methyltransferases enzymes: 5-methyltetrahydrofolate--homocysteine S-methyltransferases also known EC:2.1.1.13; Betaine--homocysteine S-methyltransferase (vitamin B12 dependent), EC:2.1.1.5,; and Homocysteine S-methyltransferase, EC:2.1.1.10,.	GO:0071267|L-methionine salvage;GO:0046500|S-adenosylmethionine metabolic process;GO:0033477|S-methylmethionine metabolic process;GO:0000096|sulfur amino acid metabolic process;	GO:0005829|cytosol;GO:0070062|extracellular exosome;	GO:0061627|S-methylmethionine-homocysteine S-methyltransferase activity;GO:0008270|zinc ion binding;	K00547	mmuM; homocysteine S-methyltransferase [EC:2.1.1.10]
ENSSSCG00000014112	2.9136243313458947	3.264970659284614	2.3234135918971557	2.001443740025461	2.8558779244525803	2.366999496846679	JMY	protein_coding	chr2:88022709-88098518:+	gi|927105277|ref|XP_013850390.1|	4333	0.0	PREDICTED: junction-mediating and -regulatory protein [Sus scrofa]	gi|927105276|ref|XM_013994936.1|	8828	0.0	PREDICTED: Sus scrofa junction mediating and regulatory protein, p53 cofactor (JMY), mRNA	Q8N9B5	1270	0.0	Junction-mediating and -regulatory protein	.	.	.	.	pfam13868	Trichoplein	tumor suppressor, Mitostatin. Trichoplein or mitostatin, was first defined as a meiosis-specific nuclear structural protein. It has since been linked with mitochondrial movement. It is associated with the mitochondrial outer membrane, and over-expression leads to reduction in mitochondrial motility whereas lack of it enhances mitochondrial movement. The activity appears to be mediated through bin…	GO:0070060|'de novo' actin filament nucleation;GO:0070358|actin polymerization-dependent cell motility;GO:0034314|Arp2/3 complex-mediated actin nucleation;GO:0007050|cell cycle arrest;GO:0006281|DNA repair;GO:0043065|positive regulation of apoptotic process;GO:0051091|positive regulation of sequence-specific DNA binding transcription factor activity;GO:1901796|regulation of signal transduction by…	GO:0031252|cell leading edge;GO:0005737|cytoplasm;GO:0005856|cytoskeleton;GO:0005654|nucleoplasm;GO:0005634|nucleus;	GO:0003713|transcription coactivator activity;	.	.
ENSSSCG00000014113	39.54047509625998	41.989390536144214	41.862093694891016	26.391248241962824	12.473617446373495	18.723722002820534	HOMER1	protein_coding	chr2:88122788-88255282:-	gi|148668620|gb|EDL00939.1|	1823	0.0	homer homolog 1 (Drosophila), isoform CRA_c, partial [Mus musculus]	gi|472372330|ref|XM_004405591.1|	3746	0.0	PREDICTED: Odobenus rosmarus divergens homer scaffolding protein 1 (HOMER1), transcript variant X1, mRNA	Q2KJ56	606	0.0	Homer protein homolog 1	.	.	.	.	pfam00568	WH1	WH1 domain. WASp Homology domain 1 (WH1) domain. WASP is the protein that is defective in Wiskott-Aldrich syndrome (WAS). The majority of point mutations occur within the amino- terminal WH1 domain. The metabotropic glutamate receptors mGluR1alpha and mGluR5 bind a protein called homer, which is a WH1 domain homologue. A subset of WH1 domains has been termed a "EVH1" domain and appear to bind a p…	GO:0048148|behavioral response to cocaine;GO:0048875|chemical homeostasis within a tissue;GO:0051928|positive regulation of calcium ion transport;GO:0090279|regulation of calcium ion import;GO:2001257|regulation of cation channel activity;GO:2001256|regulation of store-operated calcium entry;GO:0051592|response to calcium ion;GO:0003009|skeletal muscle contraction;GO:0048741|skeletal muscle fiber…	GO:0045177|apical part of cell;GO:0030424|axon;GO:0030054|cell junction;GO:0043034|costamere;GO:0014069|postsynaptic density;GO:0045211|postsynaptic membrane;GO:0030018|Z disc;	GO:0035256|G-protein coupled glutamate receptor binding;	K15010	HOMER; homer
ENSSSCG00000001096	0.09310461292852831	0.08883486345735742	0.0	0.0	0.0	0.0	C6orf229	protein_coding	chr7:19599099-19601900:-	gi|311259818|ref|XP_003128255.1|	1140	5e-156	PREDICTED: uncharacterized protein C6orf229 homolog [Sus scrofa]	gi|927153596|ref|XM_003128207.3|	708	0.0	PREDICTED: Sus scrofa chromosome 7 open reading frame, human C6orf229 (C7H6orf229), mRNA	H3BNL8	306	2e-103	Uncharacterized protein C6orf229	.	.	.	.	pfam00152	tRNA-synt_2	tRNA synthetases class II (D, K and N).	GO:0009887|organ morphogenesis;GO:0007049|cell cycle;GO:0045786|negative regulation of cell cycle;GO:0008156|negative regulation of DNA replication;GO:0045892|negative regulation of transcription, DNA-templated;GO:0006461|protein complex assembly;	GO:0005737|cytoplasm;GO:0005829|cytosol;GO:0005654|nucleoplasm;GO:0005634|nucleus;	GO:0042826|histone deacetylase binding;GO:0003714|transcription corepressor activity;	.	.
ENSSSCG00000000793	6.330872005907144	6.856829331000597	5.752702114807331	5.044374874983621	6.779558153552227	6.92695394718367	PPHLN1	protein_coding	chr5:73555798-73697374:+	gi|766752985|gb|AJS19105.1|	1712	0.0	periphilin-1 splice variant 1, partial [Sus scrofa domesticus]	gi|927133620|ref|XM_013997947.1|	3289	0.0	PREDICTED: Sus scrofa periphilin 1 (PPHLN1), transcript variant X1, mRNA	Q8K2H1	516	3e-178	Periphilin-1	.	.	.	.	pfam11488	Lge1	Transcriptional regulatory protein LGE1. This family of proteins is conserved from fungi to human. In yeasts it is involved in the ubiquitination of histones H2A and H2B. This ubiquitination step is a vital one in the regulation of the transcriptional activity of RNA polymerase II. In S. cerevisiae, Rad6 and Bre1 are present in a complex, also containing Lge1, that is required for H2B ubiquitinat…	GO:0031424|keratinization;GO:0006355|regulation of transcription, DNA-templated;GO:0006351|transcription, DNA-templated;	GO:0005694|chromosome;GO:0005737|cytoplasm;GO:0005794|Golgi apparatus;GO:0043231|intracellular membrane-bounded organelle;GO:0005654|nucleoplasm;	GO:0044822|poly(A) RNA binding;	.	.
ENSSSCG00000019194	14.330014337695227	1.8230458935596825	6.852107407859399	3.08182173213285	7.311555674655923	3.5293225434319844	SNORND104	snoRNA	chr12:14867961-14868029:-	.	.	.	.	gi|356875315|gb|JN899081.1|	69	5e-27	Sus scrofa pSNORD104 snoRNA, complete sequence	.	.	.	.	.	.	.	.	pfam15083	Colipase-like	Colipase-like. This is a family of colipase-like proteins.	.	.	.	.	.
ENSSSCG00000026290	0.18820290065210005	0.38159044131789926	0.23201059611729496	0.17707826512255134	0.27007352331437834	0.23900390885660922	BBS12	protein_coding	chr8:101361456-101429976:-	gi|545894817|ref|XP_005658970.1|	3767	0.0	PREDICTED: Bardet-Biedl syndrome 12 protein [Sus scrofa]	gi|927225882|ref|XM_005658913.2|	2493	0.0	PREDICTED: Sus scrofa Bardet-Biedl syndrome 12 (BBS12), mRNA	Q6ZW61	914	0.0	Bardet-Biedl syndrome 12 protein	.	.	.	.	pfam00118	Cpn60_TCP1	TCP-1/cpn60 chaperonin family. This family includes members from the HSP60 chaperone family and the TCP-1 (T-complex protein) family.	GO:0051131|chaperone-mediated protein complex assembly;GO:0042755|eating behavior;GO:0042073|intraciliary transport;GO:0045599|negative regulation of fat cell differentiation;GO:0045494|photoreceptor cell maintenance;	GO:0005929|cilium;	GO:0005524|ATP binding;	K19402	BBS12; Bardet-Biedl syndrome 12 protein
ENSSSCG00000005319	11.005551221240406	7.669461647053638	8.92432334733742	7.853392311713541	10.294457881850695	11.65463132731659	GBA2	protein_coding	chr1:236455240-236468213:-	gi|385648282|ref|NP_001245314.1|	4695	0.0	non-lysosomal glucosylceramidase [Sus scrofa]	gi|385648281|ref|NM_001258385.1|	3238	0.0	Sus scrofa glucosidase, beta (bile acid) 2 (GBA2), mRNA	Q9HCG7	1582	0.0	Non-lysosomal glucosylceramidase	alr2816	387	4e-115	COG4354	pfam04685	DUF608	Protein of unknown function, DUF608. This family represents a conserved region with a pankaryotic distribution in a number of uncharacterized proteins.	GO:0008206|bile acid metabolic process;GO:0021954|central nervous system neuron development;GO:0006680|glucosylceramide catabolic process;GO:0016139|glycoside catabolic process;GO:0006687|glycosphingolipid metabolic process;	GO:0005789|endoplasmic reticulum membrane;GO:0000139|Golgi membrane;GO:0016021|integral component of membrane;GO:0005886|plasma membrane;GO:0005790|smooth endoplasmic reticulum;	GO:0008422|beta-glucosidase activity;GO:0004348|glucosylceramidase activity;	K17108	GBA2; non-lysosomal glucosylceramidase [EC:3.2.1.45]
ENSSSCG00000001062	23.262642008620016	18.50343480488314	19.608846619770464	10.09926805094723	11.855354744567013	10.280665139706889	DTNBP1	protein_coding	chr7:11602395-11748548:-	gi|148747439|ref|NP_001092070.1|	1555	0.0	dysbindin [Sus scrofa]	gi|148747438|ref|NM_001098600.1|	1162	0.0	Sus scrofa dystrobrevin binding protein 1 (DTNBP1), mRNA	Q2HJA5	523	0.0	Dysbindin	.	.	.	.	pfam04440	Dysbindin	Dysbindin (Dystrobrevin binding protein 1). Dysbindin is an evolutionary conserved 40-kDa coiled-coil-containing protein that binds to alpha- and beta-dystrobrevin in muscle and brain. Dystrophin and alpha-dystrobrevin are co-immunoprecipitated with dysbindin, indicating that dysbindin is DPC-associated in muscle. Dysbindin co-localizes with alpha-dystrobrevin at the sarcolemma and is up-regulate…	GO:0031532|actin cytoskeleton reorganization;GO:0008089|anterograde axon cargo transport;GO:0048490|anterograde synaptic vesicle transport;GO:0031175|neuron projection development;GO:0048812|neuron projection morphogenesis;GO:0010628|positive regulation of gene expression;GO:0001956|positive regulation of neurotransmitter secretion;GO:0060159|regulation of dopamine receptor signaling pathway;GO:0…	GO:0030424|axon;GO:1904115|axon cytoplasm;GO:0031083|BLOC-1 complex;GO:0030054|cell junction;GO:0043197|dendritic spine;GO:0005789|endoplasmic reticulum membrane;GO:0010008|endosome membrane;GO:0030426|growth cone;GO:0033162|melanosome membrane;GO:0043005|neuron projection;GO:0005634|nucleus;GO:0014069|postsynaptic density;GO:0045211|postsynaptic membrane;GO:0042734|presynaptic membrane;GO:003067…	.	.	.
ENSSSCG00000001063	14.226920709366484	15.281571913852884	13.412361647022367	7.6954842205907275	7.836371394272332	7.804211588844695	ENSSSCG00000001063	protein_coding	chr7:12117240-12137926:+	gi|194038036|ref|XP_001929111.1|	2244	0.0	PREDICTED: E3 ubiquitin-protein ligase MYLIP [Sus scrofa]	gi|545837469|ref|XM_001929076.3|	3032	0.0	PREDICTED: Sus scrofa myosin regulatory light chain interacting protein (MYLIP), mRNA	Q8WY64	840	0.0	E3 ubiquitin-protein ligase MYLIP	.	.	.	.	pfam00373	FERM_M	FERM central domain. This domain is the central structural domain of the FERM domain.	GO:0042632|cholesterol homeostasis;GO:0006928|movement of cell or subcellular component;GO:0010989|negative regulation of low-density lipoprotein particle clearance;GO:0007399|nervous system development;GO:0045732|positive regulation of protein catabolic process;GO:0031648|protein destabilization;GO:0000209|protein polyubiquitination;GO:0016567|protein ubiquitination;GO:0042787|protein ubiquitina…	GO:0005829|cytosol;GO:0019898|extrinsic component of membrane;GO:0005622|intracellular;GO:0005886|plasma membrane;	GO:0008092|cytoskeletal protein binding;GO:0016874|ligase activity;GO:0061630|ubiquitin protein ligase activity;GO:0004842|ubiquitin-protein transferase activity;GO:0008270|zinc ion binding;	K10637	MYLIP, MIR; E3 ubiquitin-protein ligase MYLIP [EC:2.3.2.27]
ENSSSCG00000001061	3.034569285543754	3.2891142950510472	2.643597189974707	1.9966732349029734	2.097137814546997	1.9769591359775993	JARID2	protein_coding	chr7:11303859-11602097:+	gi|358418559|ref|XP_003583974.1|	5706	0.0	PREDICTED: protein Jumonji isoform X1 [Bos taurus]	gi|927153199|ref|XM_013977442.1|	5471	0.0	PREDICTED: Sus scrofa jumonji, AT rich interactive domain 2 (JARID2), transcript variant X1, mRNA	Q92833	1946	0.0	Protein Jumonji	.	.	.	.	pfam02373	JmjC	JmjC domain, hydroxylase. The JmjC domain belongs to the Cupin superfamily. JmjC-domain proteins may be protein hydroxylases that catalyse a novel histone modification. This is confirmed to be a hydroxylase: the human JmjC protein named Tyw5p unexpectedly acts in the biosynthesis of a hypermodified nucleoside, hydroxy-wybutosine, in tRNA-Phe by catalyzing hydroxylation.	GO:0007417|central nervous system development;GO:0016569|covalent chromatin modification;GO:0001889|liver development;GO:0008285|negative regulation of cell proliferation;GO:0045814|negative regulation of gene expression, epigenetic;GO:0031061|negative regulation of histone methylation;GO:0045892|negative regulation of transcription, DNA-templated;GO:0051574|positive regulation of histone H3-K9 m…	GO:0035098|ESC/E(Z) complex;GO:0035097|histone methyltransferase complex;GO:0005654|nucleoplasm;GO:0005634|nucleus;	GO:0003682|chromatin binding;GO:0000977|RNA polymerase II regulatory region sequence-specific DNA binding;GO:0001227|transcriptional repressor activity, RNA polymerase II transcription regulatory region sequence-specific binding;	K11478	JARID2, JMJ; protein Jumonji
ENSSSCG00000001064	128.80796305067358	87.24270382053513	100.18759902777279	145.33767698092066	123.19203291241169	134.27885950853346	GMPR	protein_coding	chr7:12254388-12294555:+	gi|927153255|ref|XP_013832904.1|	1867	0.0	PREDICTED: GMP reductase 1 isoform X1 [Sus scrofa]	gi|927153258|ref|XM_001929120.6|	1466	0.0	PREDICTED: Sus scrofa guanosine monophosphate reductase (GMPR), transcript variant X2, mRNA	P36959	575	0.0	GMP reductase 1	ZguaC	497	2e-172	COG0516	pfam00478	IMPDH	IMP dehydrogenase / GMP reductase domain. This family is involved in biosynthesis of guanosine nucleotide. Members of this family contain a TIM barrel structure. In the inosine monophosphate dehydrogenases 2 CBS domains pfam00571 are inserted in the TIM barrel. This family is a member of the common phosphate binding site TIM barrel family.	GO:0006144|purine nucleobase metabolic process;GO:0015951|purine ribonucleotide interconversion;GO:0043101|purine-containing compound salvage;GO:0009409|response to cold;	GO:0005737|cytoplasm;GO:0005829|cytosol;GO:1902560|GMP reductase complex;	GO:0003920|GMP reductase activity;GO:0046872|metal ion binding;	K00364	E1.7.1.7, guaC; GMP reductase [EC:1.7.1.7]
ENSSSCG00000001065	5.367498113302522	6.390078576724511	5.321129165992659	3.295616007277122	2.4356113967880573	4.253419714704377	ATXN1	protein_coding	chr7:12304036-12721993:-	gi|350586420|ref|XP_001927889.3|	3579	0.0	PREDICTED: ataxin-1 [Sus scrofa]	gi|927153223|ref|XM_013977443.1|	4056	0.0	PREDICTED: Sus scrofa ataxin 1 (ATXN1), transcript variant X1, mRNA	P54253	1215	0.0	Ataxin-1	.	.	.	.	pfam08517	AXH	Ataxin-1 and HBP1 module (AXH). AXH is a protein-protein and RNA binding motif found in Ataxin-1 (ATX1). ATX1 is responsible for the autosomal-dominant neurodegenerative disorder Spinocerebellar ataxia type-1 (SCA1) in humans. The AXH module has also been identified in the apparently unrelated transcription factor HBP1 which is thought to be involved in the architectural regulation of chromatin a…	GO:0045892|negative regulation of transcription, DNA-templated;GO:0051168|nuclear export;GO:0006396|RNA processing;GO:0006351|transcription, DNA-templated;	GO:0005737|cytoplasm;GO:0043231|intracellular membrane-bounded organelle;GO:0042405|nuclear inclusion body;GO:0016363|nuclear matrix;GO:0005654|nucleoplasm;GO:0005634|nucleus;	GO:0003677|DNA binding;GO:0042802|identical protein binding;GO:0034046|poly(G) binding;GO:0008266|poly(U) RNA binding;GO:0008022|protein C-terminus binding;GO:0043621|protein self-association;	.	.
ENSSSCG00000001068	107.01158732446238	135.85264949929487	119.14265895619116	93.76827400311763	91.11421209201013	93.03592433795694	CAP2	protein_coding	chr7:13211110-13350961:+	gi|803189154|ref|XP_011956643.1|	2024	0.0	PREDICTED: adenylyl cyclase-associated protein 2 [Ovis aries]	gi|927153331|ref|XM_003128188.5|	2458	0.0	PREDICTED: Sus scrofa CAP, adenylate cyclase-associated protein, 2 (yeast) (CAP2), partial mRNA	P40123	752	0.0	Adenylyl cyclase-associated protein 2	.	.	.	.	pfam01213	CAP_N	Adenylate cyclase associated (CAP) N terminal.	GO:0008154|actin polymerization or depolymerization;GO:0007190|activation of adenylate cyclase activity;GO:0000902|cell morphogenesis;GO:0007163|establishment or maintenance of cell polarity;GO:0007165|signal transduction;	GO:0030864|cortical actin cytoskeleton;GO:0005886|plasma membrane;	GO:0003779|actin binding;GO:0008179|adenylate cyclase binding;	K17261	CAP1_2, SRV2; adenylyl cyclase-associated protein
ENSSSCG00000026297	0.3287098569359118	0.4368491985368749	0.17892969700398653	0.5301940860623925	0.19092731091654935	0.09758278270130286	KLB	protein_coding	chr8:30653556-30691344:+	gi|927166426|ref|XP_003482415.2|	5265	0.0	PREDICTED: beta-klotho [Sus scrofa]	gi|927166425|ref|XM_003482367.3|	3197	0.0	PREDICTED: Sus scrofa klotho beta (KLB), mRNA	Q86Z14	1857	0.0	Beta-klotho	BH1923	226	2e-62	COG2723	pfam00232	Glyco_hydro_1	Glycosyl hydrolase family 1.	GO:0005975|carbohydrate metabolic process;GO:0008543|fibroblast growth factor receptor signaling pathway;GO:1901657|glycosyl compound metabolic process;GO:0000165|MAPK cascade;GO:0048015|phosphatidylinositol-mediated signaling;GO:0008284|positive regulation of cell proliferation;GO:0090080|positive regulation of MAPKKK cascade by fibroblast growth factor receptor signaling pathway;GO:0014066|regu…	GO:0005887|integral component of plasma membrane;GO:0005622|intracellular;GO:0005886|plasma membrane;	GO:0016303|1-phosphatidylinositol-3-kinase activity;GO:0017134|fibroblast growth factor binding;GO:0005104|fibroblast growth factor receptor binding;GO:0004553|hydrolase activity, hydrolyzing O-glycosyl compounds;GO:0046934|phosphatidylinositol-4,5-bisphosphate 3-kinase activity;GO:0005088|Ras guanyl-nucleotide exchange factor activity;GO:0004871|signal transducer activity;	.	.
ENSSSCG00000039486	0.03068811264124676	0.058561530100380864	0.013756849718991462	0.06599804454288227	0.014679275533963532	0.0	FAM69C	protein_coding	chr1:149610498-149630109:+	gi|602728613|ref|XP_007449738.1|	1397	4e-178	PREDICTED: protein FAM69C, partial [Lipotes vexillifer]	gi|927223872|ref|XM_013986868.1|	865	0.0	PREDICTED: Sus scrofa uncharacterized LOC100621485 (LOC100621485), mRNA	Q0P6D2	461	2e-147	Protein FAM69C	.	.	.	.	pfam12260	PIP49_C	Protein-kinase domain of FAM69. This is the C-terminal region of a family of FAM69 proteins from Metazoa and Viridiplantae that are active protein-kinases. The family members have a short transmembrane helix close to the N-terminus, and thereafter are highly enriched with cysteines. FAM69 proteins are localized to the endoplasmic reticulum. Many members also have a short EF-hand, calcium-binding,…	.	GO:0005789|endoplasmic reticulum membrane;GO:0016021|integral component of membrane;	.	.	.
ENSSSCG00000026294	3.4080088520124154	2.995003967990907	2.2313048740133987	1.5550620883058106	2.541791452968714	2.619531617376367	GMFB	protein_coding	chr1:183846580-183863418:-	gi|675690160|ref|XP_009004309.1|	823	4e-98	PREDICTED: glia maturation factor beta [Callithrix jacchus]	gi|545888103|ref|XM_005674092.1|	3279	0.0	PREDICTED: Sus scrofa glia maturation factor, beta (GMFB), transcript variant X1, mRNA	Q5R6P6	247	3e-73	Glia maturation factor beta	.	.	.	.	pfam00241	Cofilin_ADF	Cofilin/tropomyosin-type actin-binding protein. Severs actin filaments and binds to actin monomers.	GO:0034316|negative regulation of Arp2/3 complex-mediated actin nucleation;	GO:0005622|intracellular;	.	.	.
ENSSSCG00000039481	0.1356338805625474	0.25882750340662164	0.12160375800985045	0.0	0.3892726400858477	0.8768841504514653	ENSSSCG00000039481	protein_coding	chr2:9752710-9753195:+	gi|311247499|ref|XP_003122675.1|	676	6e-85	PREDICTED: flap endonuclease 1 [Sus scrofa]	gi|288784167|dbj|AK351457.1|	486	0.0	Sus scrofa mRNA, clone:THY010012D01, expressed in thymus	Q58DH8	262	1e-85	Flap endonuclease 1	YKL113c	130	2e-35	COG0258	pfam01367	5_3_exonuc	5'-3' exonuclease, C-terminal SAM fold.	GO:0006284|base-excision repair;GO:0043137|DNA replication, removal of RNA primer;	GO:0005739|mitochondrion;GO:0000784|nuclear chromosome, telomeric region;GO:0005730|nucleolus;GO:0005654|nucleoplasm;GO:0005886|plasma membrane;GO:0043234|protein complex;	GO:0008409|5'-3' exonuclease activity;GO:0017108|5'-flap endonuclease activity;GO:0003677|DNA binding;GO:0000287|magnesium ion binding;GO:0004523|RNA-DNA hybrid ribonuclease activity;	K04799	FEN1, RAD2; flap endonuclease-1 [EC:3.-.-.-]
ENSSSCG00000039480	4.614264616737863	5.1384096379134565	4.237317364011166	2.460805579318155	2.784254196297041	2.6879453672760767	ERLIN2	protein_coding	chr15:48643721-48662613:-	gi|545874126|ref|XP_005671837.1|	1784	0.0	PREDICTED: erlin-2 isoform X1 [Sus scrofa]	gi|927209714|ref|XM_005671780.2|	4454	0.0	PREDICTED: Sus scrofa ER lipid raft associated 2 (ERLIN2), transcript variant X1, mRNA	Q5R7C5	617	0.0	Erlin-2	.	.	.	.	pfam01145	Band_7	SPFH domain / Band 7 family. This family has been called SPFH, Band 7 or PHB domain. Recent phylogenetic analysis has shown this domain to be a slipin or Stomatin-like integral membrane domain conserved from protozoa to mammals.	GO:0008203|cholesterol metabolic process;GO:0030433|ER-associated ubiquitin-dependent protein catabolic process;	GO:0005789|endoplasmic reticulum membrane;GO:0016021|integral component of membrane;	.	.	.
ENSSSCG00000039488	4.349786836843374	5.86679188678952	2.166577749633751	0.9527913216655126	1.1816129180935795	0.8927532788070315	SPON2	protein_coding	chr8:446993-450538:-	gi|478516054|ref|XP_004432263.1|	1497	0.0	PREDICTED: spondin-2 [Ceratotherium simum simum]	gi|288782088|dbj|AK350759.1|	1232	0.0	Sus scrofa mRNA, clone:TCH010023F11, expressed in trachea	Q9WV75	432	2e-143	Spondin-2	.	.	.	.	pfam06468	Spond_N	Spondin_N. This conserved region is found at the in the N-terminal half of several Spondin proteins. Spondins are involved in patterning axonal growth trajectory through either inhibiting or promoting adhesion of embryonic nerve cells.	GO:0007155|cell adhesion;GO:0045087|innate immune response;	GO:0031012|extracellular matrix;GO:0005578|proteinaceous extracellular matrix;	GO:0046872|metal ion binding;GO:0005102|receptor binding;	.	.
ENSSSCG00000006870	4.887712305161778	4.357460682888575	4.805106526066876	3.267101595788132	4.802329403544046	5.054519331096049	ENSSSCG00000006870	protein_coding	chr4:118024991-118090395:-	gi|156120723|ref|NP_001095508.1|	2020	0.0	hippocampus abundant transcript 1 protein [Bos taurus]	gi|465969025|ref|XM_004263074.1|	2429	0.0	PREDICTED: Orcinus orca hippocampus abundant transcript 1 (HIAT1), mRNA	P70187	114	3e-25	Hippocampus abundant transcript 1 protein	.	.	.	.	pfam07690	MFS_1	Major Facilitator Superfamily.	GO:0055085|transmembrane transport;	GO:0016021|integral component of membrane;	GO:0005215|transporter activity;	.	.
ENSSSCG00000006871	5.029892582789408	5.809586010199229	3.763646775444287	4.269993966208166	4.3416294453636715	5.064668968307086	ENSSSCG00000006871	protein_coding	chr4:118107300-118152960:-	gi|802983174|ref|XP_012032465.1|	1713	0.0	PREDICTED: UDP-N-acetylglucosamine transporter isoform X1 [Ovis aries]	gi|927124995|ref|XM_005663641.2|	1150	0.0	PREDICTED: Sus scrofa solute carrier family 35 (UDP-N-acetylglucosamine (UDP-GlcNAc) transporter), member A3 (SLC35A3), transcript variant X3, mRNA	Q6YC49	617	0.0	UDP-N-acetylglucosamine transporter	SPCC1795.03	236	1e-70	COG0697	pfam04142	Nuc_sug_transp	Nucleotide-sugar transporter. This family of membrane proteins transport nucleotide sugars from the cytoplasm into golgi vesicles. Human SLC35A1 transports CMP-sialic acid, SLC35A2 transports UDP-galactose and SLC35A3 transports UDP-GlcNAc.	GO:0015788|UDP-N-acetylglucosamine transport;	GO:0000139|Golgi membrane;GO:0016021|integral component of membrane;	GO:0005351|sugar:proton symporter activity;	K15272	SLC35A1_2_3; solute carrier family 35 (UDP-sugar transporter), member A1/2/3
ENSSSCG00000006872	191.44844016157384	166.64911454642865	182.49064006922035	149.3398898704001	68.33981597354922	102.27924673735602	AGL	protein_coding	chr4:118177957-118269267:-	gi|594050996|ref|XP_006049838.1|	7847	0.0	PREDICTED: glycogen debranching enzyme isoform X1 [Bubalus bubalis]	gi|594632171|ref|XM_007169533.1|	3950	0.0	PREDICTED: Balaenoptera acutorostrata scammoni amylo-alpha-1, 6-glucosidase, 4-alpha-glucanotransferase (AGL), transcript variant X1, mRNA	Q2PQH8	2985	0.0	Glycogen debranching enzyme	YPR184w_2	790	0.0	COG3408	pfam14701	hDGE_amylase	glucanotransferase domain of human glycogen debranching enzyme. this is a glucanotransferase catalytic domain of the eukaryotic variant of the glycogen debranching enzyme (GDE). The eukaryotic GDEs performs two functions: 4-##-D-glucanotransferase (EC 2.4.1.25) and Amylo-##-1,6-glucosidase (EC 3.2.1.33), performed by the, respectively N- and C- terminal halfs of eukaryotic GDE enzymes. hDGE_amyla…	GO:0005978|glycogen biosynthetic process;GO:0005980|glycogen catabolic process;	GO:0005737|cytoplasm;	GO:0004134|4-alpha-glucanotransferase activity;GO:0004135|amylo-alpha-1,6-glucosidase activity;GO:0030247|polysaccharide binding;	K01196	AGL; glycogen debranching enzyme [EC:2.4.1.25 3.2.1.33]
ENSSSCG00000006873	4.630230930290589	2.480982525733644	2.9140720626201357	2.6734003745526143	1.6474718549792402	1.4746217893405262	FRRS1	protein_coding	chr4:118269143-118375846:+	gi|190360621|ref|NP_001121958.1|	3084	0.0	ferric-chelate reductase 1 precursor [Sus scrofa]	gi|190360620|ref|NM_001128486.1|	1785	0.0	Sus scrofa ferric-chelate reductase 1 (FRRS1), mRNA	A2VE04	914	0.0	Ferric-chelate reductase 1	.	.	.	.	pfam02014	Reeler	Reeler domain.	.	GO:0016021|integral component of membrane;	GO:0046872|metal ion binding;GO:0016491|oxidoreductase activity;	.	.
ENSSSCG00000006874	13.230630356124257	12.76743274971074	5.31979144848057	12.689983494723927	9.274906546707342	11.290307851135841	PALMD	protein_coding	chr4:118372944-118428410:-	gi|84579917|ref|NP_001033734.1|	2631	0.0	palmdelphin [Sus scrofa]	gi|288781299|dbj|AK343908.1|	2251	0.0	Sus scrofa mRNA, clone:AMP010079E12, expressed in alveolar macrophages	Q2MJV9	81.3	6e-14	Palmdelphin	.	.	.	.	pfam03285	Paralemmin	Paralemmin.	GO:0008360|regulation of cell shape;	GO:0005737|cytoplasm;GO:0043197|dendritic spine;GO:0016020|membrane;	.	K16519	AKAP2; A-kinase anchor protein 2
ENSSSCG00000006651	2.823073288721477	2.4945729252379962	1.4089103760305839	1.4953987307817629	1.782770141557718	1.3100934631157335	ADAMTSL4	protein_coding	chr4:98577823-98589563:-	gi|927122664|ref|XP_013852644.1|	4764	0.0	PREDICTED: ADAMTS-like protein 4 isoform X1 [Sus scrofa]	gi|927122663|ref|XM_013997190.1|	4293	0.0	PREDICTED: Sus scrofa ADAMTS-like 4 (ADAMTSL4), transcript variant X1, mRNA	Q6UY14	89.0	2e-16	ADAMTS-like protein 4	.	.	.	.	pfam05986	ADAM_spacer1	ADAM-TS Spacer 1. This family represents the Spacer-1 region from the ADAM-TS family of metalloproteinases.	GO:0006915|apoptotic process;GO:0002064|epithelial cell development;GO:0030198|extracellular matrix organization;GO:0043065|positive regulation of apoptotic process;GO:0036066|protein O-linked fucosylation;	GO:0005788|endoplasmic reticulum lumen;GO:0005614|interstitial matrix;	GO:0004222|metalloendopeptidase activity;GO:0002020|protease binding;	.	.
ENSSSCG00000006876	0.5392595968139301	0.7595432735341179	0.3683641691798197	0.13806369271339222	0.1473989116335972	0.11858358760070459	PLPPR5	protein_coding	chr4:118946892-119065186:+	gi|45758731|gb|AAS76645.1|	1694	0.0	PAP2 protein, partial [Homo sapiens]	gi|350529392|ref|NM_001245001.1|	1740	0.0	Sus scrofa lipid phosphate phosphatase-related protein type 5 (LPPR5), mRNA	Q32ZL2	617	0.0	Phospholipid phosphatase-related protein type 5	ECU10g1440	55.8	6e-08	COG0671	pfam01569	PAP2	PAP2 superfamily. This family includes the enzyme type 2 phosphatidic acid phosphatase (PAP2), Glucose-6-phosphatase EC:3.1.3.9, Phosphatidylglycerophosphatase B EC:3.1.3.27 and bacterial acid phosphatase EC:3.1.3.2. The family also includes a variety of haloperoxidases that function by oxidizing halides in the presence of hydrogen peroxide to form the corresponding hypohalous acids.	GO:0046839|phospholipid dephosphorylation;GO:0006644|phospholipid metabolic process;GO:0051491|positive regulation of filopodium assembly;GO:0010976|positive regulation of neuron projection development;GO:0007165|signal transduction;	GO:0005887|integral component of plasma membrane;GO:0005886|plasma membrane;	GO:0042577|lipid phosphatase activity;	K19581	LPPR1_2_5; lipid phosphate phosphatase-related protein type 1/2/5
ENSSSCG00000006877	4.444516225939916	4.470609091131838	2.8565522911217265	1.7274224168738153	2.4077350784838707	1.8051581693000514	SNX7	protein_coding	chr4:119036551-119326516:-	gi|927125047|ref|XP_005663703.2|	2145	0.0	PREDICTED: sorting nexin-7 isoform X1 [Sus scrofa]	gi|927125046|ref|XM_005663646.2|	1763	0.0	PREDICTED: Sus scrofa sorting nexin 7 (SNX7), transcript variant X1, mRNA	Q9UNH6	691	0.0	Sorting nexin-7	SPAC6F6.12	90.5	7e-19	COG5391	pfam00787	PX	PX domain. PX domains bind to phosphoinositides.	GO:0006897|endocytosis;GO:0015031|protein transport;GO:0016050|vesicle organization;	GO:0030659|cytoplasmic vesicle membrane;GO:0005768|endosome;GO:0019898|extrinsic component of membrane;	GO:0035091|phosphatidylinositol binding;	K17921	SNX7_30; sorting nexin-7/30
ENSSSCG00000006878	4.912872865371877	6.0389415281177445	4.761815913474359	4.267509189056836	4.191912221372085	4.891721616123192	DPYD	protein_coding	chr4:119931393-120712461:+	gi|13399647|pdb|1H7W|A	5299	0.0	Chain A, Dihydropyrimidine Dehydrogenase (Dpd) From Pig	gi|149944626|ref|NM_214044.2|	4341	0.0	Sus scrofa dihydropyrimidine dehydrogenase (DPYD), mRNA	Q28943	1847	0.0	Dihydropyrimidine dehydrogenase [NADP(+)]	SMc01815_1	220	4e-62	COG0167	pfam14691	Fer4_20	Dihydroprymidine dehydrogenase domain II, 4Fe-4S cluster. Domain II of the enzyme dihydroprymidine dehydrogenase binds FAD. Dihydroprymidine dehydrogenase catalyses the first and rate-limiting step of pyrimidine degradation by converting pyrimidines to the corresponding 5,6- dihydro compounds. This domain carries two Fe4-S4 clusters.	GO:0019483|beta-alanine biosynthetic process;GO:0006214|thymidine catabolic process;GO:0006212|uracil catabolic process;	GO:0005737|cytoplasm;	GO:0051539|4 iron, 4 sulfur cluster binding;GO:0017113|dihydropyrimidine dehydrogenase (NADP+) activity;GO:0050660|flavin adenine dinucleotide binding;GO:0010181|FMN binding;GO:0046872|metal ion binding;GO:0050661|NADP binding;GO:0042803|protein homodimerization activity;	K00207	DPYD; dihydropyrimidine dehydrogenase (NADP+) [EC:1.3.1.2]
ENSSSCG00000006879	5.442215092627482	7.293029142835001	5.518870368157628	4.076695538053288	6.161918673863549	6.024075584336597	PTBP2	protein_coding	chr4:120961381-121041911:-	gi|971408095|ref|XP_015146220.1|	2527	0.0	PREDICTED: polypyrimidine tract-binding protein 2 isoform X4 [Gallus gallus]	gi|823424162|ref|XM_004409210.2|	2883	0.0	PREDICTED: Odobenus rosmarus divergens polypyrimidine tract binding protein 2 (PTBP2), transcript variant X5, mRNA	Q66H20	583	0.0	Polypyrimidine tract-binding protein 2	.	.	.	.	pfam13893	RRM_5	RNA recognition motif. (a.k.a. RRM, RBD, or RNP domain). The RRM motif is probably diagnostic of an RNA binding protein. RRMs are found in a variety of RNA binding proteins, including various hnRNP proteins, proteins implicated in regulation of alternative splicing, and protein components of snRNPs. The motif also appears in a few single stranded DNA binding proteins.	GO:0021549|cerebellum development;GO:0006376|mRNA splice site selection;GO:0033119|negative regulation of RNA splicing;GO:2000177|regulation of neural precursor cell proliferation;GO:0021510|spinal cord development;	GO:0030426|growth cone;GO:0043025|neuronal cell body;GO:0005634|nucleus;GO:0005681|spliceosomal complex;	GO:0003729|mRNA binding;GO:0000166|nucleotide binding;GO:0036002|pre-mRNA binding;	K14948	PTBP2, NPTB; polypyrimidine tract-binding protein 2
ENSSSCG00000032569	0.29692822501530647	0.566622372322604	0.26621363239994283	0.9578635113385886	0.568127636882048	1.0969516013369682	ENSSSCG00000032569	protein_coding	chr9:114785607-114814626:-	.	.	.	.	gi|927178807|ref|XM_013989569.1|	47	4e-14	PREDICTED: Sus scrofa MDM4, p53 regulator (MDM4), mRNA	.	.	.	.	.	.	.	.	pfam02212	GED	Dynamin GTPase effector domain.	.	.	.	.	.
ENSSSCG00000006409	0.06265975851083463	0.0	0.0	0.0	0.0	0.0	ENSSSCG00000006409	protein_coding	chr4:91156248-91160468:-	gi|927120544|ref|XP_013852342.1|	1096	1e-147	PREDICTED: serum amyloid P-component [Sus scrofa]	gi|288783084|dbj|AK344897.1|	1036	0.0	Sus scrofa mRNA, clone:ITT010009E03, expressed in small intestine	Q3T166	329	6e-111	Mucosal pentraxin	.	.	.	.	pfam00354	Pentaxin	Pentaxin family. Pentaxins are also known as pentraxins.	.	GO:0005576|extracellular region;	GO:0046872|metal ion binding;	.	.
ENSSSCG00000006400	0.049824690818894964	0.07130961828549778	0.022335384124258246	0.0	0.0	0.0	SLAMF9	protein_coding	chr4:90535454-90539670:+	gi|927120471|ref|XP_013852331.1|	1236	3e-160	PREDICTED: SLAM family member 9 [Sus scrofa]	gi|927120470|ref|XM_013996877.1|	1231	0.0	PREDICTED: Sus scrofa SLAM family member 9 (SLAMF9), mRNA	Q96A28	309	5e-96	SLAM family member 9	.	.	.	.	pfam13927	Ig_3	Immunoglobulin domain. This family contains immunoglobulin-like domains.	.	GO:0016021|integral component of membrane;	.	.	.
ENSSSCG00000006403	0.03851479167595562	0.018374257472336855	0.0	0.0	0.009211534866185705	0.008892902990680943	CRP	protein_coding	chr4:90782840-90805103:+	gi|55742770|ref|NP_999009.1|	1124	5e-138	C-reactive protein precursor [Sus scrofa]	gi|149944464|ref|NM_213844.2|	1679	0.0	Sus scrofa C-reactive protein, pentraxin-related (CRP), mRNA	O19062	162	2e-42	C-reactive protein	.	.	.	.	pfam00354	Pentaxin	Pentaxin family. Pentaxins are also known as pentraxins.	GO:0006953|acute-phase response;GO:2000482|regulation of interleukin-8 secretion;	GO:0005576|extracellular region;	GO:0046872|metal ion binding;	.	.
ENSSSCG00000035018	0.02305633646498707	0.04399795965569014	0.0	0.04958509957261669	0.022057421368977734	0.08517777387086635	GABRD	protein_coding	chr6:64049699-64060670:+	gi|958772771|ref|XP_014718604.1|	1919	0.0	PREDICTED: gamma-aminobutyric acid receptor subunit delta isoform X2 [Equus asinus]	gi|466021682|ref|XM_004272295.1|	1109	0.0	PREDICTED: Orcinus orca gamma-aminobutyric acid (GABA) A receptor, delta (GABRD), mRNA	P18506	715	0.0	Gamma-aminobutyric acid receptor subunit delta	.	.	.	.	pfam02931	Neur_chan_LBD	Neurotransmitter-gated ion-channel ligand binding domain. This family is the extracellular ligand binding domain of these ion channels. This domain forms a pentameric arrangement in the known structure.	GO:0007268|synaptic transmission;	GO:0030054|cell junction;GO:0034707|chloride channel complex;GO:1902711|GABA-A receptor complex;GO:0045211|postsynaptic membrane;	GO:0005254|chloride channel activity;GO:0005230|extracellular ligand-gated ion channel activity;GO:0004890|GABA-A receptor activity;	K05184	GABRD; gamma-aminobutyric acid receptor subunit delta
ENSSSCG00000030026	0.5021181135999241	0.3449456124011465	0.14405710272464917	0.30236032838110233	0.1921455444665062	0.09274956409841824	SORCS1	protein_coding	chr14:117483029-117814879:-	gi|194042004|ref|XP_001924739.1|	5177	0.0	PREDICTED: VPS10 domain-containing receptor SorCS1 isoform X8 [Sus scrofa]	gi|927208068|ref|XM_001924704.5|	2872	0.0	PREDICTED: Sus scrofa sortilin-related VPS10 domain containing receptor 1 (SORCS1), transcript variant X8, mRNA	Q8WY21	1870	0.0	VPS10 domain-containing receptor SorCS1	.	.	.	.	pfam00801	PKD	PKD domain. This domain was first identified in the Polycystic kidney disease protein PKD1. This domain has been predicted to contain an Ig-like fold.	GO:0007218|neuropeptide signaling pathway;	GO:0016021|integral component of membrane;GO:0016020|membrane;	GO:0008188|neuropeptide receptor activity;	.	.
ENSSSCG00000035015	0.3543982040505271	0.0	0.0	0.0	0.0	0.0	ENSSSCG00000035015	protein_coding	chr12:28530272-28615608:-	gi|26332607|dbj|BAC30021.1|	263	4e-28	unnamed protein product [Mus musculus]	gi|26332606|dbj|AK038512.1|	141	2e-66	Mus musculus adult male hypothalamus cDNA, RIKEN full-length enriched library, clone:A230021I02 product:hypothetical protein, full insert sequence	A0JN41	99.4	3e-25	Carbonic anhydrase-related protein 10	.	.	.	.	pfam03348	Serinc	Serine incorporator (Serinc). This is a family of eukaryotic membrane proteins which incorporate serine into membranes and facilitate the synthesis of the serine-derived lipids phosphatidylserine and sphingolipid. Members of this family contain 11 transmembrane domains and form intracellular complexes with key enzymes involved in serine and sphingolipid biosynthesis.	GO:0000398|mRNA splicing, via spliceosome;GO:0000387|spliceosomal snRNP assembly;	GO:0071013|catalytic step 2 spliceosome;GO:0005829|cytosol;GO:0034709|methylosome;GO:0043186|P granule;GO:0071011|precatalytic spliceosome;GO:0005732|small nucleolar ribonucleoprotein complex;GO:0034719|SMN-Sm protein complex;GO:0097526|spliceosomal tri-snRNP complex;GO:0005685|U1 snRNP;GO:0005689|U12-type spliceosomal complex;GO:0005686|U2 snRNP;GO:0071004|U2-type prespliceosome;GO:0005687|U4 sn…	GO:0003723|RNA binding;	.	.
ENSSSCG00000035012	2.5698007437669896	2.7329031131271346	1.2959874214052853	1.36726507303762	2.1511561771728798	2.2992551026602075	ELOVL7	protein_coding	chr16:39588124-39680488:-	gi|927212770|ref|XP_013838151.1|	1505	0.0	PREDICTED: elongation of very long chain fatty acids protein 7 [Sus scrofa]	gi|927212769|ref|XM_013982697.1|	3866	0.0	PREDICTED: Sus scrofa ELOVL fatty acid elongase 7 (ELOVL7), mRNA	A0JNC4	495	1e-163	Elongation of very long chain fatty acids protein 7	.	.	.	.	pfam01151	ELO	GNS1/SUR4 family. Members of this family are involved in long chain fatty acid elongation systems that produce the 26-carbon precursors for ceramide and sphingolipid synthesis. Predicted to be integral membrane proteins, in eukaryotes they are probably located on the endoplasmic reticulum. Yeast ELO3 affects plasma membrane H+-ATPase activity, and may act on a glucose-signaling pathway that contr…	GO:0034625|fatty acid elongation, monounsaturated fatty acid;GO:0034626|fatty acid elongation, polyunsaturated fatty acid;GO:0019367|fatty acid elongation, saturated fatty acid;GO:0035338|long-chain fatty-acyl-CoA biosynthetic process;GO:0030148|sphingolipid biosynthetic process;GO:0006636|unsaturated fatty acid biosynthetic process;GO:0042761|very long-chain fatty acid biosynthetic process;	GO:0005783|endoplasmic reticulum;GO:0030176|integral component of endoplasmic reticulum membrane;	GO:0009922|fatty acid elongase activity;	K10250	ELOVL7; elongation of very long chain fatty acids protein 7 [EC:2.3.1.199]
ENSSSCG00000035013	0.2112758524147373	0.5471641864598772	0.35178229995706733	0.32455082343889907	0.23099695125973385	0.13937915264240325	ENSSSCG00000035013	protein_coding	chr17:39032143-39034326:+	gi|344246680|gb|EGW02784.1|	242	8e-21	hypothetical protein I79_007524 [Cricetulus griseus]	gi|150171092|emb|CU210870.7|	2184	0.0	Pig DNA sequence from clone CH242-280N7 on chromosome 17, complete sequence	Q5RC80	72.8	1e-19	RNA-binding protein 39	.	.	.	.	pfam10716	NdhL	NADH dehydrogenase transmembrane subunit. The NdhL family is a component of the NDH-1L complex that is one of the proton-pumping NADH:ubiquinone oxidoreductases that catalyse the electron transfer from NADH to ubiquinone linked with proton translocation across the membrane. NDH-1L is essential for photoheterotrophic cell growth. NdhL appears to contain two transmembrane helices and it is necessar…	GO:0006397|mRNA processing;GO:0006355|regulation of transcription, DNA-templated;GO:0008380|RNA splicing;GO:0006351|transcription, DNA-templated;	GO:0016607|nuclear speck;	GO:0000166|nucleotide binding;GO:0003723|RNA binding;	K13091	RBM39, RNPC2; RNA-binding protein 39
ENSSSCG00000030305	0.13608188677414954	0.1687935762307014	0.04880216878017119	0.1316963456960157	0.09113030013570424	0.050273174132288795	SLC15A2	protein_coding	chr13:138595973-138681573:-	gi|147905019|ref|NP_001090983.1|	3707	0.0	solute carrier family 15 member 2 [Sus scrofa]	gi|594654527|ref|XM_007175604.1|	2556	0.0	PREDICTED: Balaenoptera acutorostrata scammoni solute carrier family 15 (oligopeptide transporter), member 2 (SLC15A2), mRNA	Q16348	1284	0.0	Solute carrier family 15 member 2	ECU11g1050	189	5e-50	COG3104	pfam00854	PTR2	POT family. The POT (proton-dependent oligopeptide transport) family all appear to be proton dependent transporters.	GO:0015893|drug transport;GO:0006811|ion transport;GO:0015031|protein transport;GO:0006810|transport;	GO:0070062|extracellular exosome;GO:0005887|integral component of plasma membrane;GO:0005886|plasma membrane;	GO:0015198|oligopeptide transporter activity;GO:0015333|peptide:proton symporter activity;	K14637	SLC15A2, PEPT2; solute carrier family 15 (oligopeptide transporter), member 2
ENSSSCG00000010829	7.863909622510643	7.9005052039844355	4.499851062187665	7.759702719222925	6.925774908137894	7.98927171542156	MARC1	protein_coding	chr10:10190880-10216175:+	gi|466016701|ref|XP_004271381.1|	1390	0.0	PREDICTED: mitochondrial amidoxime-reducing component 1 [Orcinus orca]	gi|927184062|ref|XM_003357633.4|	2394	0.0	PREDICTED: Sus scrofa mitochondrial amidoxime reducing component 1 (MARC1), mRNA	Q5VT66	476	2e-167	Mitochondrial amidoxime-reducing component 1	ECs1031_1	146	1e-37	COG3217	pfam03476	MOSC_N	MOSC N-terminal beta barrel domain. This domain is found to the N-terminus of pfam03473. The function of this domain is unknown, however it is predicted to adopt a beta barrel fold.	GO:0051410|detoxification of nitrogen compound;GO:0042126|nitrate metabolic process;GO:0055114|oxidation-reduction process;	GO:0016021|integral component of membrane;GO:0005743|mitochondrial inner membrane;GO:0005741|mitochondrial outer membrane;GO:0005739|mitochondrion;	GO:0030151|molybdenum ion binding;GO:0043546|molybdopterin cofactor binding;GO:0008940|nitrate reductase activity;GO:0030170|pyridoxal phosphate binding;	.	.
ENSSSCG00000010824	7.131636996183787	9.41849492953486	7.0919311671344785	5.204587408795277	5.129290519950124	5.2910345205434375	RAB3GAP2	protein_coding	chr10:9734747-9828345:-	gi|311265237|ref|XP_003130554.1|	7044	0.0	PREDICTED: LOW QUALITY PROTEIN: rab3 GTPase-activating protein non-catalytic subunit [Sus scrofa]	gi|927184050|ref|XM_003130506.4|	6716	0.0	PREDICTED: Sus scrofa RAB3 GTPase activating protein subunit 2 (non-catalytic) (RAB3GAP2), mRNA	Q9H2M9	187	2e-46	Rab3 GTPase-activating protein non-catalytic subunit	.	.	.	.	pfam14656	RAB3GAP2_C	Rab3 GTPase-activating protein regulatory subunit C-terminus. This family includes the N-terminus of the Rab3 GTPase-activating protein non-catalytic subunit. Rab3 GTPase-activating protein is a GTPase activating protein with specificity for Rab3 subfamily.	GO:0097051|establishment of protein localization to endoplasmic reticulum membrane;GO:0006886|intracellular protein transport;GO:2000786|positive regulation of autophagosome assembly;GO:1903373|positive regulation of endoplasmic reticulum tubular network organization;GO:1903061|positive regulation of protein lipidation;GO:0043087|regulation of GTPase activity;	GO:0005737|cytoplasm;GO:0005789|endoplasmic reticulum membrane;GO:0005886|plasma membrane;GO:0043234|protein complex;	GO:0008047|enzyme activator activity;GO:0030234|enzyme regulator activity;GO:0005096|GTPase activator activity;GO:0046982|protein heterodimerization activity;GO:0017137|Rab GTPase binding;	.	.
ENSSSCG00000010825	2.485241265747502	2.6196874922893536	2.5252537668731385	2.316069258654957	2.4454987831030492	1.9455628132150644	MARK1	protein_coding	chr10:9980297-10104869:+	gi|330864800|ref|NP_001179204.2|	3765	0.0	serine/threonine-protein kinase MARK1 [Bos taurus]	gi|594637624|ref|XM_007172061.1|	2001	0.0	PREDICTED: Balaenoptera acutorostrata scammoni MAP/microtubule affinity-regulating kinase 1 (MARK1), transcript variant X1, mRNA	Q9P0L2	1395	0.0	Serine/threonine-protein kinase MARK1	.	.	.	.	pfam00069	Pkinase	Protein kinase domain.	GO:0007010|cytoskeleton organization;GO:0030010|establishment of cell polarity;GO:0035556|intracellular signal transduction;GO:0000226|microtubule cytoskeleton organization;GO:0001764|neuron migration;GO:0006468|protein phosphorylation;GO:0016055|Wnt signaling pathway;	GO:0005737|cytoplasm;GO:0005856|cytoskeleton;GO:0015630|microtubule cytoskeleton;GO:0005886|plasma membrane;	GO:0005524|ATP binding;GO:0000287|magnesium ion binding;GO:0070300|phosphatidic acid binding;GO:0005546|phosphatidylinositol-4,5-bisphosphate binding;GO:0001786|phosphatidylserine binding;GO:0004674|protein serine/threonine kinase activity;GO:0050321|tau-protein kinase activity;	K08798	MARK; MAP/microtubule affinity-regulating kinase [EC:2.7.11.1]
ENSSSCG00000010826	15.445237210838034	13.960603224017866	24.96270750774845	7.5775420120831365	8.087261254469706	8.227825473375379	MARC2	protein_coding	chr10:10156795-10191317:+	gi|829901888|ref|XP_012591023.1|	1310	1e-163	PREDICTED: mitochondrial amidoxime reducing component 2 [Microcebus murinus]	gi|115547320|dbj|AK234693.1|	1499	0.0	Sus scrofa mRNA, clone:OVRM10007H07, expressed in ovary	Q1LZH1	431	3e-136	Mitochondrial amidoxime reducing component 2	PA3022	121	8e-29	COG3217	pfam03476	MOSC_N	MOSC N-terminal beta barrel domain. This domain is found to the N-terminus of pfam03473. The function of this domain is unknown, however it is predicted to adopt a beta barrel fold.	.	GO:0005741|mitochondrial outer membrane;GO:0005777|peroxisome;	GO:0030151|molybdenum ion binding;GO:0016491|oxidoreductase activity;GO:0030170|pyridoxal phosphate binding;	.	.
ENSSSCG00000010821	14.00495650447594	16.916868458977394	12.76868597384103	14.366040003322961	16.3070102163758	14.551584306593346	EPRS	protein_coding	chr10:9579178-9648367:-	gi|927184020|ref|XP_013845142.1|	7508	0.0	PREDICTED: LOW QUALITY PROTEIN: bifunctional glutamate/proline--tRNA ligase [Sus scrofa]	gi|927184019|ref|XM_013989688.1|	4843	0.0	PREDICTED: Sus scrofa glutamyl-prolyl-tRNA synthetase (EPRS), mRNA	P07814	2735	0.0	Bifunctional glutamate/proline--tRNA ligase	SPBC19C7.06_2	594	0.0	COG0442	pfam00749	tRNA-synt_1c	tRNA synthetases class I (E and Q), catalytic domain. Other tRNA synthetase sub-families are too dissimilar to be included. This family includes only glutamyl and glutaminyl tRNA synthetases. In some organisms, a single glutamyl-tRNA synthetase aminoacylates both tRNA(Glu) and tRNA(Gln).	GO:0071346|cellular response to interferon-gamma;GO:0006424|glutamyl-tRNA aminoacylation;GO:0017148|negative regulation of translation;GO:0006433|prolyl-tRNA aminoacylation;GO:0006461|protein complex assembly;GO:0006418|tRNA aminoacylation for protein translation;	GO:0017101|aminoacyl-tRNA synthetase multienzyme complex;GO:0005737|cytoplasm;GO:0005829|cytosol;GO:0097452|GAIT complex;GO:0030529|ribonucleoprotein complex;GO:0016020|membrane;	GO:0005524|ATP binding;GO:0004818|glutamate-tRNA ligase activity;GO:0051020|GTPase binding;GO:0004827|proline-tRNA ligase activity;GO:0035613|RNA stem-loop binding;	K14163	EPRS; bifunctional glutamyl/prolyl-tRNA synthetase [EC:6.1.1.17 6.1.1.15]
ENSSSCG00000010822	5.585236500706911	3.786978946491296	4.420534376369257	2.991911352610663	3.2881577196078315	3.042151158828826	BPNT1	protein_coding	chr10:9659485-9684115:-	gi|927184028|ref|XP_013845144.1|	1708	0.0	PREDICTED: 3'(2'),5'-bisphosphate nucleotidase 1 isoform X2 [Sus scrofa]	gi|927184037|ref|XM_003130503.3|	1529	0.0	PREDICTED: Sus scrofa 3'(2'), 5'-bisphosphate nucleotidase 1 (BPNT1), transcript variant X5, mRNA	O95861	411	2e-139	3'(2'),5'-bisphosphate nucleotidase 1	DR1703	73.6	4e-13	COG0483	pfam00459	Inositol_P	Inositol monophosphatase family.	GO:0050427|3'-phosphoadenosine 5'-phosphosulfate metabolic process;GO:0007399|nervous system development;GO:0006139|nucleobase-containing compound metabolic process;GO:0046854|phosphatidylinositol phosphorylation;	GO:0005737|cytoplasm;GO:0005829|cytosol;GO:0070062|extracellular exosome;	GO:0008441|3'(2'),5'-bisphosphate nucleotidase activity;GO:0000287|magnesium ion binding;	K01082	E3.1.3.7, cysQ, MET22, BPNT1; 3'(2'), 5'-bisphosphate nucleotidase [EC:3.1.3.7]
ENSSSCG00000010823	7.875752859893942	8.959953303169584	7.845640049912641	9.876337895914814	8.95561573787863	9.223130883664208	IARS2	protein_coding	chr10:9685673-9739980:+	gi|927184048|ref|XP_005656840.2|	5257	0.0	PREDICTED: isoleucine--tRNA ligase, mitochondrial [Sus scrofa]	gi|927184047|ref|XM_005656783.2|	3514	0.0	PREDICTED: Sus scrofa isoleucine--tRNA ligase, mitochondrial (LOC100739845), mRNA	Q9NSE4	1825	0.0	Isoleucine--tRNA ligase, mitochondrial	alr1073	739	0.0	COG0060	pfam00133	tRNA-synt_1	tRNA synthetases class I (I, L, M and V). Other tRNA synthetase sub-families are too dissimilar to be included.	GO:0006428|isoleucyl-tRNA aminoacylation;GO:0006418|tRNA aminoacylation for protein translation;	GO:0005737|cytoplasm;GO:0005829|cytosol;GO:0005759|mitochondrial matrix;GO:0005739|mitochondrion;	GO:0002161|aminoacyl-tRNA editing activity;GO:0005524|ATP binding;GO:0004822|isoleucine-tRNA ligase activity;GO:0000049|tRNA binding;	K01870	IARS, ileS; isoleucyl-tRNA synthetase [EC:6.1.1.5]
ENSSSCG00000001832	0.0	0.006074472023161005	0.0	0.013691694000203895	0.018271827610751596	0.0	ACAN	protein_coding	chr7:54449588-54520153:+	gi|927158579|ref|XP_013852359.1|	10913	0.0	PREDICTED: aggrecan core protein isoform X8 [Sus scrofa]	gi|927158578|ref|XM_013996905.1|	7456	0.0	PREDICTED: Sus scrofa aggrecan (ACAN), transcript variant X8, mRNA	Q28343	2058	0.0	Aggrecan core protein	.	.	.	.	pfam00193	Xlink	Extracellular link domain.	GO:0007155|cell adhesion;GO:0007417|central nervous system development;GO:0001501|skeletal system development;	GO:0005578|proteinaceous extracellular matrix;	GO:0005509|calcium ion binding;GO:0030246|carbohydrate binding;GO:0005201|extracellular matrix structural constituent;GO:0005540|hyaluronic acid binding;	.	.
ENSSSCG00000001835	1.3287897959475492	2.5678013096324186	0.980215033307266	0.8229462726912549	1.6332763513476893	1.6699891532219153	ABHD2	protein_coding	chr7:54655619-54776144:+	gi|194039634|ref|XP_001926024.1|	2232	0.0	PREDICTED: abhydrolase domain-containing protein 2 [Sus scrofa]	gi|927158634|ref|XM_001925989.6|	2754	0.0	PREDICTED: Sus scrofa abhydrolase domain containing 2 (ABHD2), mRNA	Q4R2Y9	608	0.0	Monoacylglycerol lipase ABHD2	ECU07g0900	94.0	4e-20	COG0429	pfam00561	Abhydrolase_1	alpha/beta hydrolase fold. This catalytic domain is found in a very wide range of enzymes.	GO:0046464|acylglycerol catabolic process;GO:0032570|response to progesterone;GO:0043401|steroid hormone mediated signaling pathway;	GO:0016021|integral component of membrane;GO:0005886|plasma membrane;	GO:0047372|acylglycerol lipase activity;GO:0042562|hormone binding;GO:0003707|steroid hormone receptor activity;	K13697	ABHD2; abhydrolase domain-containing protein 2
ENSSSCG00000001834	25.926825509687806	27.042174835986867	19.402613406252733	20.801189715699856	27.068710630107496	22.983381961848426	MFGE8	protein_coding	chr7:54539614-54571637:-	gi|172072653|ref|NP_001116456.1|	2293	0.0	lactadherin precursor [Sus scrofa]	gi|371916243|dbj|AK390171.1|	1933	0.0	Sus scrofa mRNA, clone: BFLT10034B10, expressed in brain (frontal lobe)	P79385	718	0.0	Lactadherin	.	.	.	.	pfam00754	F5_F8_type_C	F5/8 type C domain. This domain is also known as the discoidin (DS) domain family.	GO:0001525|angiogenesis;GO:0007155|cell adhesion;GO:0007338|single fertilization;	GO:0002080|acrosomal membrane;GO:0005576|extracellular region;	.	.	.
ENSSSCG00000001837	0.4245676957876305	0.3600863549302045	0.2749138393748456	0.3466314281251524	0.42121676894785437	0.2614157084293013	FANCI	protein_coding	chr7:54810982-54893569:+	gi|350586797|ref|XP_001926905.3|	6515	0.0	PREDICTED: Fanconi anemia group I protein [Sus scrofa]	gi|927158662|ref|XM_001926870.5|	4723	0.0	PREDICTED: Sus scrofa Fanconi anemia, complementation group I (FANCI), transcript variant X1, mRNA	Q9NVI1	2083	0.0	Fanconi anemia group I protein	YOR330c_2	100	4e-30	COG0749	pfam14678	FANCI_S4	FANCI solenoid 4. This is the solenoid 4 (S4) domain of the Fanconi anemia group I protein.	GO:0036297|interstrand cross-link repair;GO:0007095|mitotic G2 DNA damage checkpoint;GO:0031398|positive regulation of protein ubiquitination;	GO:0005737|cytoplasm;GO:0016020|membrane;GO:0005654|nucleoplasm;	GO:0003677|DNA binding;GO:0070182|DNA polymerase binding;	K10895	FANCI; fanconi anemia group I protein
ENSSSCG00000001836	0.0	0.0	0.005852587283896545	0.0	0.006245015616350499	0.0	RLBP1	protein_coding	chr7:54771978-54889014:-	gi|335292338|ref|XP_003356708.1|	1559	0.0	PREDICTED: LOW QUALITY PROTEIN: retinaldehyde-binding protein 1 [Sus scrofa]	gi|927158657|ref|XM_003356660.3|	1877	0.0	PREDICTED: Sus scrofa retinaldehyde binding protein 1 (RLBP1), mRNA	P10123	506	3e-163	Retinaldehyde-binding protein 1	.	.	.	.	pfam00650	CRAL_TRIO	CRAL/TRIO domain.	GO:0050896|response to stimulus;GO:0007601|visual perception;	GO:0005737|cytoplasm;	GO:0005502|11-cis retinal binding;GO:0019841|retinol binding;GO:0005215|transporter activity;	.	.
ENSSSCG00000001838	8.890654766156244	8.553505497453385	9.191180989722085	8.68525971995609	9.26968578085936	7.268535229146167	POLG	protein_coding	chr7:54889156-54906876:-	gi|194039637|ref|XP_001927099.1|	6245	0.0	PREDICTED: DNA polymerase subunit gamma-1 isoform X2 [Sus scrofa]	gi|927158673|ref|XM_001927064.4|	4444	0.0	PREDICTED: Sus scrofa polymerase (DNA directed), gamma (POLG), transcript variant X2, mRNA	P54098	1992	0.0	DNA polymerase subunit gamma-1	YOR330c_2	398	9e-122	COG0749	pfam00476	DNA_pol_A	DNA polymerase family A.	GO:0007568|aging;GO:0006287|base-excision repair, gap-filling;GO:0071333|cellular response to glucose stimulus;GO:0006259|DNA metabolic process;GO:0006261|DNA-dependent DNA replication;GO:0006264|mitochondrial DNA replication;GO:0010332|response to gamma radiation;GO:0055093|response to hyperoxia;GO:0009416|response to light stimulus;	GO:0070062|extracellular exosome;GO:0005760|gamma DNA polymerase complex;GO:0042645|mitochondrial nucleoid;GO:0005739|mitochondrion;GO:0043234|protein complex;GO:0043195|terminal bouton;	GO:0008408|3'-5' exonuclease activity;GO:0003682|chromatin binding;GO:0003677|DNA binding;GO:0003887|DNA-directed DNA polymerase activity;GO:0002020|protease binding;	K02332	POLG1; DNA polymerase gamma 1 [EC:2.7.7.7]
ENSSSCG00000023909	1.2648267898242371	1.0103627843824747	0.7384131811682485	0.8539987932416332	1.3225889699302296	0.8965046219761967	THPO	protein_coding	chr13:122259275-122264269:-	gi|545865065|ref|XP_003483330.2|	1435	0.0	PREDICTED: thrombopoietin isoform X1 [Sus scrofa]	gi|927201814|ref|XM_003483282.3|	1296	0.0	PREDICTED: Sus scrofa thrombopoietin (THPO), transcript variant X1, mRNA	P42705	409	1e-134	Thrombopoietin	.	.	.	.	pfam00758	EPO_TPO	Erythropoietin/thrombopoietin.	GO:0008283|cell proliferation;GO:0070374|positive regulation of ERK1 and ERK2 cascade;GO:0045654|positive regulation of megakaryocyte differentiation;GO:0051897|positive regulation of protein kinase B signaling;GO:0001934|positive regulation of protein phosphorylation;GO:0038163|thrombopoietin-mediated signaling pathway;	GO:0005615|extracellular space;	.	.	.
ENSSSCG00000023908	3.2256513810879257	2.860583946011129	2.3863322875502533	2.585455067680952	2.4232835379225874	2.604477927671494	ETAA1	protein_coding	chr3:74721069-74795623:-	gi|927110750|ref|XP_013851546.1|	4074	0.0	PREDICTED: ewing's tumor-associated antigen 1, partial [Sus scrofa]	gi|594684602|ref|XM_007189760.1|	2733	0.0	PREDICTED: Balaenoptera acutorostrata scammoni Ewing tumor-associated antigen 1 (ETAA1), transcript variant X1, mRNA	Q08DI1	1184	0.0	Ewing's tumor-associated antigen 1 homolog	.	.	.	.	pfam15350	ETAA1	Ewing's tumor-associated antigen 1 homologue. This family of proteins is found in eukaryotes, where members are expressed at high levels in the brain, liver kidney and Ewing tumor cell lines. Proteins in this family are typically between 648 and 898 amino acids in length.	.	GO:0005737|cytoplasm;	.	.	.
ENSSSCG00000023903	90.02698822339083	78.47326368909509	88.51233536141989	145.37352605880378	144.37149039183876	116.54729878232601	ATP5I	protein_coding	chr8:112025-113574:-	gi|926694687|ref|XP_013820338.1|	309	2e-33	PREDICTED: ATP synthase subunit e, mitochondrial [Capra hircus]	gi|371923346|dbj|AK399974.1|	309	2e-159	Sus scrofa mRNA, clone: HTMT10110H11, expressed in hypothalamus	Q9MYT8	108	2e-29	ATP synthase subunit e, mitochondrial	.	.	.	.	pfam05680	ATP-synt_E	ATP synthase E chain. This family consists of several ATP synthase E chain sequences which are components of the CF(0) subunit.	GO:0015986|ATP synthesis coupled proton transport;	GO:0005753|mitochondrial proton-transporting ATP synthase complex;GO:0000276|mitochondrial proton-transporting ATP synthase complex, coupling factor F(o);	GO:0016887|ATPase activity;GO:0015078|hydrogen ion transmembrane transporter activity;	K02129	ATPeF0E, ATP5I; F-type H+-transporting ATPase subunit e
ENSSSCG00000023904	0.0	0.0	0.0	0.0	0.018768502289853373	0.0	CFAP57	protein_coding	chr6:167988230-168049263:-	gi|311259502|ref|XP_003128128.1|	5376	0.0	PREDICTED: cilia- and flagella-associated protein 57 isoform X1 [Sus scrofa]	gi|927152042|ref|XM_005665496.2|	1837	0.0	PREDICTED: Sus scrofa cilia and flagella associated protein 57 (CFAP57), transcript variant X2, mRNA	Q96MR6	1864	0.0	Cilia- and flagella-associated protein 57	.	.	.	.	pfam02463	SMC_N	RecF/RecN/SMC N terminal domain. This domain is found at the N terminus of SMC proteins. The SMC (structural maintenance of chromosomes) superfamily proteins have ATP-binding domains at the N- and C-termini, and two extended coiled-coil domains separated by a hinge in the middle. The eukaryotic SMC proteins form two kind of heterodimers: the SMC1/SMC3 and the SMC2/SMC4 types. These heterodimers c…	GO:0015986|ATP synthesis coupled proton transport;	GO:0005753|mitochondrial proton-transporting ATP synthase complex;GO:0000276|mitochondrial proton-transporting ATP synthase complex, coupling factor F(o);	GO:0016887|ATPase activity;GO:0015078|hydrogen ion transmembrane transporter activity;	.	.
ENSSSCG00000023907	0.8591324277092625	0.923278078759167	0.5675620589237361	0.7487867042951403	1.2977534852635615	1.3363877376694029	AFAP1	protein_coding	chr8:3066782-3202533:+	gi|465982086|ref|XP_004265200.1|	3213	0.0	PREDICTED: actin filament-associated protein 1 [Orcinus orca]	gi|927165308|ref|XR_297475.2|	4571	0.0	PREDICTED: Sus scrofa uncharacterized LOC102159119 (LOC102159119), ncRNA	Q8N556	315	9e-93	Actin filament-associated protein 1	.	.	.	.	pfam00169	PH	PH domain. PH stands for pleckstrin homology.	GO:0051493|regulation of cytoskeleton organization;GO:0009966|regulation of signal transduction;	GO:0005737|cytoplasm;GO:0005856|cytoskeleton;GO:0005925|focal adhesion;	.	K18616	AFAP1; actin filament associated protein 1
ENSSSCG00000023906	0.8038788530902199	0.0	0.0	0.0	0.0	0.0	SCARNA1	scaRNA	chr6:84970861-84971024:+	.	.	.	.	gi|820703198|tpe|LN847491.1|	132	2e-61	TPA: Homo sapiens SCARNA1 gene for small nucleolar RNA SCARNA1	.	.	.	.	.	.	.	.	pfam00122	E1-E2_ATPase	E1-E2 ATPase.	.	.	.	.	.
ENSSSCG00000003578	2.268690606426701	2.3020871799853624	1.1945800472729478	1.316571753361316	2.3598789877261144	2.5775815762090324	FGR	protein_coding	chr6:84809531-84830399:-	gi|478503120|ref|XP_004425868.1|	2745	0.0	PREDICTED: tyrosine-protein kinase Fgr [Ceratotherium simum simum]	gi|288779572|dbj|AK349397.1|	2263	0.0	Sus scrofa mRNA, clone:PTG010063D05, expressed in pituitary gland	P09769	1009	0.0	Tyrosine-protein kinase Fgr	BH2504_1	101	7e-22	COG0515	pfam07714	Pkinase_Tyr	Protein tyrosine kinase.	GO:0030154|cell differentiation;GO:0016477|cell migration;GO:0050830|defense response to Gram-positive bacterium;GO:0038096|Fc-gamma receptor signaling pathway involved in phagocytosis;GO:0002768|immune response-regulating cell surface receptor signaling pathway;GO:0045087|innate immune response;GO:0007229|integrin-mediated signaling pathway;GO:0038083|peptidyl-tyrosine autophosphorylation;GO:001…	GO:0015629|actin cytoskeleton;GO:0005829|cytosol;GO:0070062|extracellular exosome;GO:0031234|extrinsic component of cytoplasmic side of plasma membrane;GO:0005743|mitochondrial inner membrane;GO:0005758|mitochondrial intermembrane space;GO:0005886|plasma membrane;GO:0032587|ruffle membrane;	GO:0005524|ATP binding;GO:0034988|Fc-gamma receptor I complex binding;GO:0034987|immunoglobulin receptor binding;GO:0004715|non-membrane spanning protein tyrosine kinase activity;GO:0001784|phosphotyrosine binding;GO:0019901|protein kinase binding;GO:0004713|protein tyrosine kinase activity;	K08891	FGR, SRC2; tyrosine-protein kinase Fgr [EC:2.7.10.2]
ENSSSCG00000003579	9.473040931480737	8.126222127359277	7.900221586671407	7.659012225017256	6.788416641670611	5.629164189561494	AHDC1	protein_coding	chr6:84735302-84802272:-	gi|545834546|ref|XP_005656140.1|	5022	0.0	PREDICTED: AT-hook DNA-binding motif-containing protein 1 [Sus scrofa]	gi|927146953|ref|XM_005656083.2|	6082	0.0	PREDICTED: Sus scrofa AT hook, DNA binding motif, containing 1 (AHDC1), mRNA	Q5TGY3	1878	0.0	AT-hook DNA-binding motif-containing protein 1	.	.	.	.	pfam03154	Atrophin-1	Atrophin-1 family. Atrophin-1 is the protein product of the dentatorubral-pallidoluysian atrophy (DRPLA) gene. DRPLA OMIM:125370 is a progressive neurodegenerative disorder. It is caused by the expansion of a CAG repeat in the DRPLA gene on chromosome 12p. This results in an extended polyglutamine region in atrophin-1, that is thought to confer toxicity to the protein, possibly through altering i…	.	.	GO:0003677|DNA binding;	.	.
ENSSSCG00000003572	0.07082252586988776	0.05068096964368175	0.01587414085221255	0.03807784036478945	0.016938535507361626	0.03270524516476053	SYTL1	protein_coding	chr6:84564247-84574663:+	gi|545834518|ref|XP_005656135.1|	2399	0.0	PREDICTED: synaptotagmin-like protein 1 isoform X1 [Sus scrofa]	gi|927146924|ref|XM_005656080.2|	1987	0.0	PREDICTED: Sus scrofa synaptotagmin-like 1 (SYTL1), transcript variant X4, mRNA	Q8IYJ3	771	0.0	Synaptotagmin-like protein 1	.	.	.	.	pfam00168	C2	C2 domain.	GO:0048791|calcium ion-dependent exocytosis of neurotransmitter;GO:0006887|exocytosis;GO:0006886|intracellular protein transport;GO:0017158|regulation of calcium ion-dependent exocytosis;GO:0006906|vesicle fusion;	GO:0070382|exocytic vesicle;GO:0070062|extracellular exosome;GO:0019897|extrinsic component of plasma membrane;GO:0042470|melanosome;GO:0005886|plasma membrane;GO:0098793|presynapse;	GO:0005509|calcium ion binding;GO:0005544|calcium-dependent phospholipid binding;GO:0030276|clathrin binding;GO:0042043|neurexin family protein binding;GO:0019905|syntaxin binding;	K17598	SYTL; synaptotagmin-like protein
ENSSSCG00000003573	0.4193365802199451	0.3138085734205266	0.2432681889686892	0.22987768439758569	0.5034275579905289	0.3721042634197187	MAP3K6	protein_coding	chr6:84570437-84585392:-	gi|927146931|ref|XP_013844250.1|	6152	0.0	PREDICTED: mitogen-activated protein kinase kinase kinase 6 [Sus scrofa]	gi|927146930|ref|XM_013988796.1|	4111	0.0	PREDICTED: Sus scrofa mitogen-activated protein kinase kinase kinase 6 (MAP3K6), mRNA	O95382	165	8e-40	Mitogen-activated protein kinase kinase kinase 6	.	.	.	.	pfam13281	DUF4071	Domain of unknown function (DUF4071). This domain is found at the N-terminus of many serine-threonine kinase-like proteins.	GO:0007257|activation of JUN kinase activity;GO:0006468|protein phosphorylation;GO:0007165|signal transduction;	GO:0005622|intracellular;	GO:0005524|ATP binding;GO:0000287|magnesium ion binding;GO:0004709|MAP kinase kinase kinase activity;	K04425	MAP3K6, ASK2; mitogen-activated protein kinase kinase kinase 6 [EC:2.7.11.25]
ENSSSCG00000003570	16.92363039147996	20.06905784387592	16.275667258865205	17.33899447506159	14.500980037412594	16.57208567744576	WDTC1	protein_coding	chr6:84449047-84538165:+	gi|209863045|ref|NP_001129436.1|	3520	0.0	WD and tetratricopeptide repeats protein 1 [Sus scrofa]	gi|927146826|ref|XM_005656068.2|	4593	0.0	PREDICTED: Sus scrofa WD and tetratricopeptide repeats 1 (WDTC1), transcript variant X1, mRNA	Q8N5D0	1356	0.0	WD and tetratricopeptide repeats protein 1	.	.	.	.	pfam13414	TPR_11	TPR repeat.	GO:0055082|cellular chemical homeostasis;GO:0032869|cellular response to insulin stimulus;GO:0006006|glucose metabolic process;GO:0001701|in utero embryonic development;GO:0035264|multicellular organism growth;GO:0045717|negative regulation of fatty acid biosynthetic process;GO:0000122|negative regulation of transcription from RNA polymerase II promoter;GO:0016567|protein ubiquitination;GO:000836…	GO:0005829|cytosol;GO:0005634|nucleus;	GO:0004857|enzyme inhibitor activity;	K11807	WDTC1; WD and tetratricopeptide repeats protein 1
ENSSSCG00000024950	3.417723132080699	4.93991157554147	4.945177875782512	3.6750882360085275	3.852360346804401	3.8753700823413832	ENSSSCG00000024950	protein_coding	chr2:28496961-28793008:+	gi|927102561|ref|XP_013849922.1|	1251	2e-168	PREDICTED: uncharacterized protein LOC100737821 isoform X1 [Sus scrofa]	gi|927102564|ref|XM_005661054.2|	1299	0.0	PREDICTED: Sus scrofa uncharacterized LOC100737821 (LOC100737821), transcript variant X3, mRNA	.	.	.	.	PA5185	110	5e-28	COG0824	pfam13279	4HBT_2	Thioesterase-like superfamily. This family contains a wide variety of enzymes, principally thioesterases. These enzymes are part of the Hotdog fold superfamily.	.	.	.	.	.
ENSSSCG00000003576	0.0	0.0	0.05699076797761554	0.0	0.0	0.0	GPR3	protein_coding	chr6:84610107-84613202:+	gi|380748972|ref|NP_001244154.1|	1348	6e-179	G-protein coupled receptor 3 [Sus scrofa]	gi|380748971|ref|NM_001257225.1|	2074	0.0	Sus scrofa G protein-coupled receptor 3 (GPR3), mRNA	P46089	495	3e-169	G-protein coupled receptor 3	.	.	.	.	pfam00001	7tm_1	7 transmembrane receptor (rhodopsin family). This family contains, amongst other G-protein-coupled receptors (GCPRs), members of the opsin family, which have been considered to be typical members of the rhodopsin superfamily. They share several motifs, mainly the seven transmembrane helices, GCPRs of the rhodopsin superfamily. All opsins bind a chromophore, such as 11-cis-retinal. The function of…	GO:0007189|adenylate cyclase-activating G-protein coupled receptor signaling pathway;GO:0040020|regulation of meiotic nuclear division;	GO:0005887|integral component of plasma membrane;	GO:0004930|G-protein coupled receptor activity;	K04311	GPR3; G protein-coupled receptor 3
ENSSSCG00000003577	8.017710862503622	8.5661912471233	5.2944132893757025	4.5172368797650115	6.177612203081236	5.431827894821349	WASF2	protein_coding	chr6:84621743-84697426:-	gi|385862190|ref|NP_001245373.1|	1292	2e-157	wiskott-Aldrich syndrome protein family member 2 [Sus scrofa]	gi|385862189|ref|NM_001258444.1|	5277	0.0	Sus scrofa WAS protein family, member 2 (WASF2), mRNA	Q9Y6W5	100	3e-20	Wiskott-Aldrich syndrome protein family member 2	.	.	.	.	pfam09606	Med15	ARC105 or Med15 subunit of Mediator complex non-fungal. The approx. 70 residue Med15 domain of the ARC-Mediator co-activator is a three-helix bundle with marked similarity to the KIX domain. The sterol regulatory element binding protein (SREBP) family of transcription activators use the ARC105 subunit to activate target genes in the regulation of cholesterol and fatty acid homeostasis. In additio…	GO:0030036|actin cytoskeleton organization;GO:0030048|actin filament-based movement;GO:0007188|adenylate cyclase-modulating G-protein coupled receptor signaling pathway;GO:0001667|ameboidal-type cell migration;GO:0001525|angiogenesis;GO:0038096|Fc-gamma receptor signaling pathway involved in phagocytosis;GO:0030032|lamellipodium assembly;GO:0072673|lamellipodium morphogenesis;GO:0035855|megakaryo…	GO:0015629|actin cytoskeleton;GO:0005913|cell-cell adherens junction;GO:0005829|cytosol;GO:0005769|early endosome;GO:0070062|extracellular exosome;GO:0005622|intracellular;GO:0030027|lamellipodium;GO:0001726|ruffle;GO:0031209|SCAR complex;	GO:0003779|actin binding;GO:0098641|cadherin binding involved in cell-cell adhesion;GO:0032403|protein complex binding;	K05748	WASF2; WAS protein family, member 2
ENSSSCG00000003575	0.0	0.0	0.0	0.028364105577853363	0.0	0.0	CD164L2	protein_coding	chr6:84597398-84603398:-	gi|545834532|ref|XP_005656138.1|	698	5e-83	PREDICTED: CD164 sialomucin-like 2 protein isoform X1 [Sus scrofa]	gi|927146934|ref|XM_005656081.2|	965	0.0	PREDICTED: Sus scrofa CD164 sialomucin-like 2 (CD164L2), transcript variant X1, mRNA	Q6UWJ8	233	1e-69	CD164 sialomucin-like 2 protein	.	.	.	.	pfam05283	MGC-24	Multi-glycosylated core protein 24 (MGC-24). This family consists of several MGC-24 (or Cd164 antigen) proteins from eukaryotic organisms. MGC-24/CD164 is a sialomucin expressed in many normal and cancerous tissues. In humans, soluble and transmembrane forms of MGC-24 are produced by alternative splicing.	.	GO:0016021|integral component of membrane;	.	.	.
ENSSSCG00000010739	6.181634247700997	4.734038530050144	4.677532601861714	3.873327860057681	4.490942314179193	3.595112400468461	CTBP2	protein_coding	chr14:134329493-134489193:-	gi|927208660|ref|XP_013839311.1|	4798	0.0	PREDICTED: C-terminal-binding protein 2 isoform X2 [Sus scrofa]	gi|927208659|ref|XM_013983857.1|	3555	0.0	PREDICTED: Sus scrofa C-terminal binding protein 2 (CTBP2), transcript variant X2, mRNA	P56545	810	0.0	C-terminal-binding protein 2	MJ1018	165	4e-42	COG0111	pfam00389	2-Hacid_dh	D-isomer specific 2-hydroxyacid dehydrogenase, catalytic domain. This family represents the largest portion of the catalytic domain of 2-hydroxyacid dehydrogenases as the NAD binding domain is inserted within the structural domain.	GO:0008285|negative regulation of cell proliferation;GO:0000122|negative regulation of transcription from RNA polymerase II promoter;GO:0045892|negative regulation of transcription, DNA-templated;GO:0035563|positive regulation of chromatin binding;GO:0048386|positive regulation of retinoic acid receptor signaling pathway;GO:0045944|positive regulation of transcription from RNA polymerase II promo…	GO:0030054|cell junction;GO:0005634|nucleus;GO:0097470|ribbon synapse;GO:0017053|transcriptional repressor complex;	GO:0003682|chromatin binding;GO:0051287|NAD binding;GO:0016616|oxidoreductase activity, acting on the CH-OH group of donors, NAD or NADP as acceptor;GO:0042803|protein homodimerization activity;GO:0003713|transcription coactivator activity;GO:0003714|transcription corepressor activity;	K04496	CTBP; C-terminal binding protein
ENSSSCG00000031818	0.5701021920293884	0.6119521621084123	0.670858353647856	0.6896617281637838	0.8181037971101492	0.36199402844119943	ENSSSCG00000031818	protein_coding	chr9:102435376-102455903:+	gi|41018160|sp|Q7M2P1.1|STP3_PIG	304	6e-30	RecName: Full=Spermatid nuclear transition protein 3; Short=STP-3; Short=TP-3; Short=TP3 [Sus scrofa]	gi|288782081|dbj|AK350752.1|	453	0.0	Sus scrofa mRNA, clone:TCH010022G01, expressed in trachea	Q7M2P1	121	2e-31	Spermatid nuclear transition protein 3	.	.	.	.	pfam14907	NTP_transf_5	Uncharacterized nucleotidyltransferase. This family is likely to be an uncharacterized group of nucleotidyltransferases.	GO:0030154|cell differentiation;GO:0007275|multicellular organismal development;GO:0007283|spermatogenesis;	GO:0000786|nucleosome;GO:0005634|nucleus;	GO:0003677|DNA binding;	.	.
ENSSSCG00000031819	1.9368677557315779	2.607794835988165	1.2541504131672137	2.059578545764265	2.2647203546620327	1.1925722600235402	TP53I11	protein_coding	chr2:17448283-17465795:+	gi|350580141|ref|XP_003122897.3|	776	1e-92	PREDICTED: tumor protein p53-inducible protein 11 isoform X2 [Sus scrofa]	gi|927102209|ref|XM_003122849.5|	2880	0.0	PREDICTED: Sus scrofa tumor protein p53 inducible protein 11 (TP53I11), transcript variant X2, mRNA	Q0VCQ8	287	3e-88	Tumor protein p53-inducible protein 11	.	.	.	.	pfam14936	p53-inducible11	tumor protein p53-inducible protein 11. TP53 is a tumor suppressor gene, when switched on it suppresses tumor development by inducing stable growth arrest or cell apoptosis. The tumor protein TP53 inducible protein 11 encoded for by the gene TP53I11, has a protein sequence of 189 amino acids in length and 21 kDa in mass. The role of this protein is thought to negatively regulate cell proliferatio…	.	GO:0016021|integral component of membrane;	.	.	.
ENSSSCG00000031810	2.6560825285663605	2.6694367386623825	2.5930085003998733	2.9957249931979066	3.568704332248338	3.0636655978958967	ENSSSCG00000031810	protein_coding	chr7:55811865-55835464:+	gi|958702089|ref|XP_014698073.1|	2880	0.0	PREDICTED: tubulin polyglutamylase TTLL13-like isoform X2 [Equus asinus]	gi|829759493|ref|XM_012763299.1|	1665	0.0	PREDICTED: Microcebus murinus GDP-D-glucose phosphorylase 1 (GDPGP1), transcript variant X1, mRNA	A4Q9F6	113	8e-24	Tubulin polyglutamylase TTLL13	.	.	.	.	pfam03133	TTL	Tubulin-tyrosine ligase family. Tubulins and microtubules are subjected to several post-translational modifications of which the reversible detyrosination/tyrosination of the carboxy-terminal end of most alpha-tubulins has been extensively analysed. This modification cycle involves a specific carboxypeptidase and the activity of the tubulin-tyrosine ligase (TTL). The true physiological function o…	GO:0006464|cellular protein modification process;	GO:0005874|microtubule;	GO:0005524|ATP binding;GO:0016874|ligase activity;	K16582	TTLL6_13; tubulin polyglutamylase TTLL6/13 [EC:6.-.-.-]
ENSSSCG00000031813	0.03944237304616188	0.04704194714121843	0.017681204605171974	0.01060312637831796	0.009433383349873948	0.009107077617681635	ENSSSCG00000031813	protein_coding	chr4:76062440-76382517:-	gi|426359679|ref|XP_004047094.1|	1836	0.0	PREDICTED: XK-related protein 4 [Gorilla gorilla gorilla]	gi|927119110|ref|XM_003355056.3|	6000	0.0	PREDICTED: Sus scrofa XK-related protein 4 (LOC100627085), mRNA	Q5GH76	276	9e-77	XK-related protein 4	.	.	.	.	pfam09815	XK-related	XK-related protein. Members of this family comprise various XK-related proteins, that are involved in sodium-dependent transport of neutral amino acids or oligopeptides. These proteins are responsible for the Kx blood group system - defects results in McLeod syndrome, an X-linked multi-system disorder characterized by late onset abnormalities in the neuromuscular and hematopoietic systems.	.	GO:0016021|integral component of membrane;GO:0016020|membrane;	.	.	.
ENSSSCG00000031815	0.0	0.0667676043819629	0.0	0.22573853451928522	0.06694497632049612	0.0	ENSSSCG00000031815	protein_coding	chr9:5943915-5944856:-	gi|311263363|ref|XP_003129632.1|	1556	0.0	PREDICTED: olfactory receptor 52B4-like [Sus scrofa]	gi|311263362|ref|XM_003129584.1|	930	0.0	PREDICTED: Sus scrofa olfactory receptor 52B4-like (LOC100517905), mRNA	Q8NGK2	497	3e-176	Olfactory receptor 52B4	.	.	.	.	pfam00001	7tm_1	7 transmembrane receptor (rhodopsin family). This family contains, amongst other G-protein-coupled receptors (GCPRs), members of the opsin family, which have been considered to be typical members of the rhodopsin superfamily. They share several motifs, mainly the seven transmembrane helices, GCPRs of the rhodopsin superfamily. All opsins bind a chromophore, such as 11-cis-retinal. The function of…	GO:0050890|cognition;GO:0007165|signal transduction;	GO:0016021|integral component of membrane;GO:0005886|plasma membrane;	GO:0004930|G-protein coupled receptor activity;GO:0004984|olfactory receptor activity;	K04257	OLFR; olfactory receptor
ENSSSCG00000026466	1.3779623407963826	1.4494144627866838	1.0419241524984542	1.05327593262921	1.4850302680721157	1.3876624242829005	SLC23A2	protein_coding	chr17:13848729-14012459:-	gi|926707042|ref|XP_013824125.1|	3116	0.0	PREDICTED: solute carrier family 23 member 2 [Capra hircus]	gi|594688725|ref|XM_007191705.1|	3227	0.0	PREDICTED: Balaenoptera acutorostrata scammoni solute carrier family 23 (ascorbic acid transporter), member 2 (SLC23A2), transcript variant X1, mRNA	Q9UGH3	1093	0.0	Solute carrier family 23 member 2	PAB1838	114	3e-25	COG2233	pfam00860	Xan_ur_permease	Permease family. This family includes permeases for diverse substrates such as xanthine, uracil, and vitamin C. However many members of this family are functionally uncharacterized and may transport other substrates. Members of this family have ten predicted transmembrane helices.	GO:0019852|L-ascorbic acid metabolic process;GO:0015882|L-ascorbic acid transport;GO:0015993|molecular hydrogen transport;GO:0015851|nucleobase transport;GO:0006139|nucleobase-containing compound metabolic process;GO:0006979|response to oxidative stress;GO:0070904|transepithelial L-ascorbic acid transport;	GO:0016324|apical plasma membrane;GO:0009925|basal plasma membrane;GO:0016323|basolateral plasma membrane;GO:0005737|cytoplasm;GO:0016021|integral component of membrane;GO:0005887|integral component of plasma membrane;GO:0016020|membrane;GO:0005886|plasma membrane;	GO:0008520|L-ascorbate:sodium symporter activity;GO:0015229|L-ascorbic acid transporter activity;GO:0015205|nucleobase transmembrane transporter activity;GO:0070890|sodium-dependent L-ascorbate transmembrane transporter activity;GO:0008523|sodium-dependent multivitamin transmembrane transporter activity;	K14611	SLC23A1_2, SVCT1_2; solute carrier family 23 (nucleobase transporter), member 1/2
ENSSSCG00000021218	0.06236335473358376	0.11900678018506916	0.01863747284540754	0.0	0.029830732116323245	0.009599623758152275	TDRD6	protein_coding	chr7:41468780-41483469:+	gi|194039439|ref|XP_001928203.1|	10823	0.0	PREDICTED: tudor domain-containing protein 6 isoform X1 [Sus scrofa]	gi|927157811|ref|XM_001928168.3|	6269	0.0	PREDICTED: Sus scrofa tudor domain containing 6 (TDRD6), transcript variant X1, mRNA	O60522	3184	0.0	Tudor domain-containing protein 6	.	.	.	.	pfam00567	TUDOR	Tudor domain.	GO:0030154|cell differentiation;GO:0007275|multicellular organismal development;GO:0007283|spermatogenesis;	GO:0033391|chromatoid body;GO:0005737|cytoplasm;	.	K18405	TDRD1_4_6_7; tudor domain-containing protein 1/4/6/7
ENSSSCG00000021217	82.20461386460059	94.17078050174688	92.54757950345929	73.03989678965912	85.70744258789435	64.27892331370636	FKBP3	protein_coding	chr1:175317559-175332788:-	gi|556721262|ref|XP_005956484.1|	1250	2e-169	PREDICTED: peptidyl-prolyl cis-trans isomerase FKBP3 [Pantholops hodgsonii]	gi|927097420|ref|XM_013993382.1|	1017	0.0	PREDICTED: Sus scrofa peptidyl-prolyl cis-trans isomerase FKBP3 (LOC100736985), mRNA	P26884	356	1e-115	Peptidyl-prolyl cis-trans isomerase FKBP3	SPBC839.17c	93.6	2e-22	COG0545	pfam00254	FKBP_C	FKBP-type peptidyl-prolyl cis-trans isomerase.	GO:0061077|chaperone-mediated protein folding;	GO:0005789|endoplasmic reticulum membrane;GO:0005634|nucleus;	GO:0005528|FK506 binding;GO:0003755|peptidyl-prolyl cis-trans isomerase activity;GO:0044822|poly(A) RNA binding;	K09570	FKBP3; FK506-binding protein 3 [EC:5.2.1.8]
ENSSSCG00000021216	1.4840534393268732	1.307072488752093	0.9650079519851467	0.9995715712088488	1.1233241152798932	0.8585369596312465	TCEANC2	protein_coding	chr6:158219136-158261729:-	gi|148645276|gb|ABR01162.1|	1432	3e-171	endonuclease/reverse transcriptase [Sus scrofa]	gi|927150991|ref|XM_003356456.3|	2058	0.0	PREDICTED: Sus scrofa transcription elongation factor A (SII) N-terminal and central domain containing 2 (TCEANC2), transcript variant X3, mRNA	A5PKE4	403	4e-129	Transcription elongation factor A N-terminal and central domain-containing protein 2	.	.	.	.	pfam08711	Med26	TFIIS helical bundle-like domain. Mediator is a large complex of up to 33 proteins that is conserved from plants to fungi to humans - the number and representation of individual subunits varying with species {1-2]. It is arranged into four different sections, a core, a head, a tail and a kinase-activity part, and the number of subunits within each of these is what varies with species. Overall, Me…	GO:0006351|transcription, DNA-templated;	GO:0005634|nucleus;	GO:0003677|DNA binding;	.	.
ENSSSCG00000021696	0.4813386829802316	0.5680378394325567	0.31798307820869426	0.28603380027289904	0.15753423905088304	0.19888044501564747	NRSN1	protein_coding	chr7:19007469-19030029:+	gi|545837641|ref|XP_005665686.1|	1134	9e-140	PREDICTED: neurensin-1 isoform X1 [Sus scrofa]	gi|161936479|emb|CU302418.5|	4399	0.0	Pig DNA sequence from clone CH242-240P19 on chromosome 7, complete sequence	Q8IZ57	377	5e-119	Neurensin-1	.	.	.	.	pfam14927	Neurensin	Neurensin. The neurensin family includes the neuronal membrane proteins neurensin-1 and neurensin-2. Neurensin-1 plays a role in neurite extension.	GO:0007399|nervous system development;	GO:0016023|cytoplasmic membrane-bounded vesicle;GO:0030426|growth cone;GO:0016021|integral component of membrane;GO:0043005|neuron projection;GO:0043025|neuronal cell body;GO:0030133|transport vesicle;	.	.	.
ENSSSCG00000021210	74.99160925799524	70.75696874378518	83.28445951483569	65.76616748459992	61.466844999269796	51.36818670635771	HIKESHI	protein_coding	chr9:20181180-20224345:+	gi|444728485|gb|ELW68942.1|	1137	4e-148	hypothetical protein TREES_T100012980 [Tupaia chinensis]	gi|927174836|ref|XM_003482583.3|	1102	0.0	PREDICTED: Sus scrofa chromosome 9 open reading frame, human C11orf73 (C9H11orf73), mRNA	Q56JY0	121	2e-31	Protein Hikeshi	.	.	.	.	pfam05603	DUF775	Protein of unknown function (DUF775). This family consists of several eukaryotic proteins of unknown function.	GO:0034605|cellular response to heat;GO:0006606|protein import into nucleus;GO:0015031|protein transport;	GO:0030054|cell junction;GO:0005829|cytosol;GO:0070062|extracellular exosome;GO:0005622|intracellular;GO:0005634|nucleus;	GO:0030544|Hsp70 protein binding;GO:0008565|protein transporter activity;	.	.
ENSSSCG00000029425	19.659774056276607	23.304283506725035	24.883969007489398	23.726783314547017	30.889398631822683	24.52321906231003	MRPS18B	protein_coding	chr7:23165946-23172998:+	gi|178057031|ref|NP_001116612.1|	1316	2e-178	28S ribosomal protein S18b, mitochondrial [Sus scrofa]	gi|115548315|dbj|AK234972.1|	1425	0.0	Sus scrofa mRNA, clone:OVRM10037E01, expressed in ovary	Q767K8	511	8e-180	28S ribosomal protein S18b, mitochondrial	.	.	.	.	pfam01084	Ribosomal_S18	Ribosomal protein S18.	GO:0006412|translation;	GO:0005739|mitochondrion;GO:0005840|ribosome;	GO:0003735|structural constituent of ribosome;	K16174	MRPS18B, MRPS18-2; small subunit ribosomal protein S18b, mitochondrial
ENSSSCG00000029420	2.355323466129878	2.395158321369315	2.6396076668146664	1.2996681211674503	2.431169605500894	2.862285560611271	ZNF569	protein_coding	chr6:46377296-46425611:-	gi|927139342|ref|XP_005664612.2|	3510	0.0	PREDICTED: LOW QUALITY PROTEIN: zinc finger protein 569 [Sus scrofa]	gi|927139341|ref|XM_005664555.2|	2049	0.0	PREDICTED: Sus scrofa zinc finger protein 569 (LOC102164889), mRNA	Q5MCW4	1244	0.0	Zinc finger protein 569	.	.	.	.	pfam01352	KRAB	KRAB box. The KRAB domain (or Kruppel-associated box) is present in about a third of zinc finger proteins containing C2H2 fingers. The KRAB domain is found to be involved in protein-protein interactions. The KRAB domain is generally encoded by two exons. The regions coded by the two exons are known as KRAB-A and KRAB-B. The A box plays an important role in repression by binding to corepressors, w…	GO:0006355|regulation of transcription, DNA-templated;GO:0006351|transcription, DNA-templated;	GO:0005634|nucleus;	GO:0003677|DNA binding;GO:0046872|metal ion binding;	K09228	KRAB; KRAB domain-containing zinc finger protein
ENSSSCG00000037726	0.0	0.0	0.0	0.0	1.201184146550616	0.0	ENSSSCG00000037726	protein_coding	chr9:72765863-72781246:+	.	.	.	.	.	.	.	.	.	.	.	.	.	.	.	.	pfam09358	UBA_e1_C	Ubiquitin-activating enzyme e1 C-terminal domain. This presumed domain found at the C-terminus of Ubiquitin-activating enzyme e1 proteins is functionally uncharacterized.	.	.	.	.	.
ENSSSCG00000037721	0.0	0.0	0.0	0.0	0.8408289025854312	0.0	ENSSSCG00000037721	protein_coding	chr2:60368935-60388645:+	.	.	.	.	gi|371923657|dbj|AK400284.1|	42	6e-12	Sus scrofa mRNA, clone: BFLT10131C09, expressed in brain (frontal lobe)	.	.	.	.	.	.	.	.	pfam09334	tRNA-synt_1g	tRNA synthetases class I (M). This family includes methionyl tRNA synthetases.	.	.	.	.	.
ENSSSCG00000037723	0.0	0.11394036834748016	0.0	0.1284092388388688	0.0	0.0	C4orf22	protein_coding	chr8:136964028-137056313:-	gi|335294180|ref|XP_003357157.1|	653	7e-85	PREDICTED: uncharacterized protein C4orf22 homolog [Sus scrofa]	gi|927172063|ref|XM_003357109.3|	370	0.0	PREDICTED: Sus scrofa chromosome 8 open reading frame, human C4orf22 (C8H4orf22), mRNA	Q2YDG2	246	4e-81	Uncharacterized protein C4orf22 homolog	.	.	.	.	pfam14713	DUF4464	Domain of unknown function (DUF4464). This family of proteins is found in eukaryotes. Proteins in this family are typically between 224 and 241 amino acids in length. There is a conserved YID sequence motif.	GO:0032148|activation of protein kinase B activity;GO:0019722|calcium-mediated signaling;GO:0016477|cell migration;GO:1990416|cellular response to brain-derived neurotrophic factor stimulus;GO:0071364|cellular response to epidermal growth factor stimulus;GO:0032869|cellular response to insulin stimulus;GO:0007173|epidermal growth factor receptor signaling pathway;GO:0097191|extrinsic apoptotic si…	GO:0042995|cell projection;GO:0016023|cytoplasmic membrane-bounded vesicle;GO:0005829|cytosol;GO:0005925|focal adhesion;GO:0005634|nucleus;GO:0043204|perikaryon;GO:0005886|plasma membrane;	GO:0004676|3-phosphoinositide-dependent protein kinase activity;GO:0005524|ATP binding;GO:0005158|insulin receptor binding;GO:0016004|phospholipase activator activity;GO:0019901|protein kinase binding;	.	.
ENSSSCG00000028672	0.13610061793543984	0.2380749885085683	0.23387591311667383	0.024391569111856696	0.03255101567132175	0.06285011755767556	GCKR	protein_coding	chr3:111646705-111683660:-	gi|335285747|ref|XP_003354938.1|	3243	0.0	PREDICTED: glucokinase regulatory protein isoform X2 [Sus scrofa]	gi|927112869|ref|XM_003354890.3|	2082	0.0	PREDICTED: Sus scrofa glucokinase (hexokinase 4) regulator (GCKR), transcript variant X2, mRNA	Q14397	99.8	1e-19	Glucokinase regulatory protein	VC0690	73.6	7e-13	COG2103	pfam15058	Speriolin_N	Speriolin N terminus. This family represents the N-terminus of the sperm centrosome protein speriolin.	GO:0005975|carbohydrate metabolic process;GO:0033132|negative regulation of glucokinase activity;GO:0000060|protein import into nucleus, translocation;GO:0010827|regulation of glucose transport;GO:0009750|response to fructose;GO:0070328|triglyceride homeostasis;GO:0046415|urate metabolic process;	GO:0005737|cytoplasm;GO:0005829|cytosol;GO:0005654|nucleoplasm;	GO:0030246|carbohydrate binding;GO:0070095|fructose-6-phosphate binding;	.	.
ENSSSCG00000037728	12.648338670155773	13.259985988810268	14.770413032302635	12.577540121817377	15.381479097671834	11.755032333003761	ANAPC16	protein_coding	chr14:75082673-75095060:+	gi|298160956|ref|NP_001177154.1|	448	3e-48	anaphase-promoting complex subunit 16 [Sus scrofa]	gi|927206640|ref|XM_013983316.1|	1276	0.0	PREDICTED: Sus scrofa anaphase promoting complex subunit 16 (ANAPC16), transcript variant X1, mRNA	Q58DR0	175	5e-49	Anaphase-promoting complex subunit 16	.	.	.	.	pfam05994	FragX_IP	Cytoplasmic Fragile-X interacting family. CYFIP1/2 (Cytoplasmic fragile X mental retardation interacting protein) like proteins for a highly conserved protein family. The function of CYFIPs is unclear, but CYFIP interaction with fragile X mental retardation interacting protein (FMRP) involves the domain of FMRP which also mediating homo- and heteromerization.	GO:0051301|cell division;GO:0007067|mitotic nuclear division;GO:0016567|protein ubiquitination;	GO:0005680|anaphase-promoting complex;GO:0000777|condensed chromosome kinetochore;GO:0005737|cytoplasm;GO:0000776|kinetochore;	.	.	.
ENSSSCG00000017902	14.503509272633561	10.662510488489165	11.962645825431775	15.018050955422714	13.83843842875615	13.660974242435836	CAMTA2	protein_coding	chr12:51932321-51953585:+	gi|545859927|ref|XP_005669217.1|	4804	0.0	PREDICTED: calmodulin-binding transcription activator 2 isoform X2 [Sus scrofa]	gi|927197802|ref|XM_005669160.2|	4887	0.0	PREDICTED: Sus scrofa calmodulin binding transcription activator 2 (CAMTA2), transcript variant X2, mRNA	O94983	1640	0.0	Calmodulin-binding transcription activator 2	.	.	.	.	pfam03859	CG-1	CG-1 domain. CG-1 domains are highly conserved domains of about 130 amino-acid residues containing a predicted bipartite NLS and named after a partial cDNA clone isolated from parsley encoding a sequence-specific DNA-binding protein. CG-1 domains are associated with CAMTA proteins (for CAlModulin -binding Transcription Activator) that are transcription factors containing a calmodulin -binding dom…	GO:0014898|cardiac muscle hypertrophy in response to stress;GO:0045944|positive regulation of transcription from RNA polymerase II promoter;GO:0006357|regulation of transcription from RNA polymerase II promoter;	GO:0005634|nucleus;	GO:0003682|chromatin binding;GO:0042826|histone deacetylase binding;GO:0043565|sequence-specific DNA binding;GO:0008134|transcription factor binding;GO:0001077|transcriptional activator activity, RNA polymerase II core promoter proximal region sequence-specific binding;	.	.
ENSSSCG00000017900	110.5432170628868	121.1164343488807	110.02495577765501	118.48048226055054	94.1437638427091	112.1964892628601	KIF1C	protein_coding	chr12:51900301-51922150:-	gi|311268219|ref|XP_003131946.1|	4624	0.0	PREDICTED: kinesin-like protein KIF1C isoform X1 [Sus scrofa]	gi|965814231|ref|XM_012122789.2|	2523	0.0	PREDICTED: Ovis aries musimon kinesin family member 1C (KIF1C), transcript variant X2, mRNA	O43896	1726	0.0	Kinesin-like protein KIF1C	SPAC1834.07	226	2e-62	COG5059	pfam00225	Kinesin	Kinesin motor domain.	GO:0030705|cytoskeleton-dependent intracellular transport;GO:0007018|microtubule-based movement;GO:0006890|retrograde vesicle-mediated transport, Golgi to ER;	GO:0005783|endoplasmic reticulum;GO:0005794|Golgi apparatus;GO:0005871|kinesin complex;GO:0005874|microtubule;	GO:0005524|ATP binding;GO:0016887|ATPase activity;GO:0003777|microtubule motor activity;GO:0003774|motor activity;GO:0044822|poly(A) RNA binding;	K10392	KIF1; kinesin family member 1
ENSSSCG00000017901	5.559756067786601	6.575395075180037	7.999316299629798	7.338782559094136	4.618189048291194	5.288636356748837	INCA1	protein_coding	chr12:51923417-51931940:+	gi|927197819|ref|XP_013836715.1|	1044	5e-133	PREDICTED: protein INCA1 isoform X2 [Sus scrofa]	gi|927197818|ref|XM_013981261.1|	1022	0.0	PREDICTED: Sus scrofa inhibitor of CDK, cyclin A1 interacting protein 1 (INCA1), transcript variant X2, mRNA	Q0VD86	253	2e-77	Protein INCA1	.	.	.	.	pfam15142	INCA1	INCA1. This family of proteins inhibits cyclin-dependent kinase activity.	GO:0008285|negative regulation of cell proliferation;GO:0045736|negative regulation of cyclin-dependent protein serine/threonine kinase activity;GO:2001235|positive regulation of apoptotic signaling pathway;	GO:0005737|cytoplasm;GO:0005634|nucleus;	GO:0030332|cyclin binding;GO:0004861|cyclin-dependent protein serine/threonine kinase inhibitor activity;	.	.
ENSSSCG00000017906	3.950259213126781	3.5676991457677594	3.3253565628146573	2.577818406772606	3.721417947170195	3.4673656575197236	RNF167	protein_coding	chr12:51964116-51971150:-	gi|311268237|ref|XP_003131954.1|	1595	0.0	PREDICTED: E3 ubiquitin-protein ligase RNF167 [Sus scrofa]	gi|927197826|ref|XM_005669164.2|	1796	0.0	PREDICTED: Sus scrofa ring finger protein 167 (RNF167), transcript variant X2, mRNA	Q9H6Y7	471	7e-161	E3 ubiquitin-protein ligase RNF167	.	.	.	.	pfam13639	zf-RING_2	Ring finger domain.	GO:0045786|negative regulation of cell cycle;GO:0000209|protein polyubiquitination;	GO:0005737|cytoplasm;GO:0012505|endomembrane system;GO:0016021|integral component of membrane;	GO:0016874|ligase activity;GO:0004842|ubiquitin-protein transferase activity;GO:0008270|zinc ion binding;	K15706	RNF167; E3 ubiquitin-protein ligase RNF167 [EC:2.3.2.27]
ENSSSCG00000017907	2.04348111137092	1.829163497229346	2.2665168319381523	2.5371597257827494	2.035563738282084	1.9651525092024207	PFN1	protein_coding	chr12:51962642-51973656:+	gi|927197831|ref|XP_013836720.1|	1460	0.0	PREDICTED: mitochondrial 2-oxoglutarate/malate carrier protein [Sus scrofa]	gi|371918398|dbj|AK397475.1|	1337	0.0	Sus scrofa mRNA, clone: SMG010025A11, expressed in submaxillary gland	P22292	552	0.0	Mitochondrial 2-oxoglutarate/malate carrier protein	.	.	.	.	pfam00235	Profilin	Profilin.	GO:0006412|translation;GO:0006810|transport;	GO:0016021|integral component of membrane;GO:0005743|mitochondrial inner membrane;GO:0005739|mitochondrion;GO:0005634|nucleus;	GO:0044822|poly(A) RNA binding;GO:0003735|structural constituent of ribosome;	K15104	SLC25A11, OGC; solute carrier family 25 (mitochondrial oxoglutarate transporter), member 11
ENSSSCG00000017904	2035.8155193312944	1693.6498753356032	2373.366225584025	2388.6788255754354	2112.9840652568173	2491.9934244768565	ENO3	protein_coding	chr12:51949957-51961496:-	gi|545859898|ref|XP_005669210.1|	2226	0.0	PREDICTED: beta-enolase isoform X1 [Sus scrofa]	gi|167859937|gb|EU418439.1|	1565	0.0	Sus scrofa beta-enolase 3 transcript variant 1 (ENO3) mRNA, complete cds, alternatively spliced	Q1KYT0	106	6e-23	Beta-enolase	YGR254w	482	3e-152	COG0148	pfam00113	Enolase_C	Enolase, C-terminal TIM barrel domain.	GO:0006096|glycolytic process;	GO:0000015|phosphopyruvate hydratase complex;	GO:0000287|magnesium ion binding;GO:0004634|phosphopyruvate hydratase activity;	K01689	ENO, eno; enolase [EC:4.2.1.11]
ENSSSCG00000017908	0.10496507317420069	0.0667676043819629	0.1568456114458262	0.03762308908654754	0.10041746448074416	0.0	GP1BA	protein_coding	chr12:51975874-51977757:-	gi|311268241|ref|XP_003131967.1|	1706	0.0	PREDICTED: platelet glycoprotein Ib alpha chain [Sus scrofa]	gi|927197823|ref|XM_013981263.1|	1884	0.0	PREDICTED: Sus scrofa glycoprotein Ib (platelet), alpha polypeptide (GP1BA), transcript variant X3, mRNA	Q28256	100	1e-20	Platelet glycoprotein Ib alpha chain	.	.	.	.	pfam13855	LRR_8	Leucine rich repeat.	GO:0007596|blood coagulation;GO:0007155|cell adhesion;GO:0019221|cytokine-mediated signaling pathway;GO:0046426|negative regulation of JAK-STAT cascade;GO:0006469|negative regulation of protein kinase activity;	GO:0005737|cytoplasm;GO:0016021|integral component of membrane;	GO:0004860|protein kinase inhibitor activity;	K06261	GP1BA; platelet glycoprotein Ib alpha chain
ENSSSCG00000017909	0.531418737951479	0.5915560407049558	0.25807609778509744	0.3333377889643191	0.29656377148629587	0.16360312764313534	CHRNE	protein_coding	chr12:52011279-52017158:+	gi|470642685|ref|XP_004326007.1|	1963	0.0	PREDICTED: acetylcholine receptor subunit epsilon [Tursiops truncatus]	gi|927197849|ref|XR_001299989.1|	1730	0.0	PREDICTED: Sus scrofa cholinergic receptor, nicotinic, epsilon (muscle) (CHRNE), ncRNA	P02715	748	0.0	Acetylcholine receptor subunit epsilon	.	.	.	.	pfam02931	Neur_chan_LBD	Neurotransmitter-gated ion-channel ligand binding domain. This family is the extracellular ligand binding domain of these ion channels. This domain forms a pentameric arrangement in the known structure.	GO:0098655|cation transmembrane transport;GO:0007274|neuromuscular synaptic transmission;GO:0042391|regulation of membrane potential;GO:0035094|response to nicotine;GO:0007165|signal transduction;GO:0007271|synaptic transmission, cholinergic;	GO:0005892|acetylcholine-gated channel complex;GO:0030054|cell junction;GO:0045211|postsynaptic membrane;	GO:0004889|acetylcholine-activated cation-selective channel activity;	K04817	CHRNE; nicotinic acetylcholine receptor epsilon
ENSSSCG00000023139	9.722770044048174	8.890349794361068	9.91043936876416	12.384107171178277	8.028107388601022	7.696959787432001	METTL23	protein_coding	chr12:4804038-4808911:-	gi|440895153|gb|ELR47415.1|	1172	5e-158	hypothetical protein M91_06704, partial [Bos mutus]	gi|927192909|ref|XM_003357951.4|	1127	0.0	PREDICTED: Sus scrofa methyltransferase like 23 (METTL23), transcript variant X2, mRNA	A2AA28	392	1e-134	Methyltransferase-like protein 23	YLR285w	55.5	7e-08	COG3897	pfam10294	Methyltransf_16	Putative methyltransferase.	.	GO:0005737|cytoplasm;GO:0016021|integral component of membrane;	GO:0008168|methyltransferase activity;	.	.
ENSSSCG00000023130	4.7828101401260685	5.977979807596308	5.1425203688503025	3.719639188341336	4.305449199985641	3.5534183198329257	ASCC1	protein_coding	chr14:74975163-75158855:-	gi|346644695|ref|NP_001231013.1|	2107	0.0	activating signal cointegrator 1 complex subunit 1 isoform 2 [Sus scrofa]	gi|346644692|ref|NM_001244083.1|	1628	0.0	Sus scrofa activating signal cointegrator 1 complex subunit 1 (ASCC1), transcript variant 1, mRNA	Q8N9N2	593	0.0	Activating signal cointegrator 1 complex subunit 1	.	.	.	.	pfam10469	AKAP7_NLS	AKAP7 2'5' RNA ligase-like domain. AKAP7_NLS is the N-terminal domain of the cyclic AMP-dependent protein kinase A, PKA, anchor protein AKAP7. This protein anchors PKA for its role in regulating PKA-mediated gene transcription in both somatic cells and oocytes. AKAP7_NLS carries the nuclear localisation signal (NLS) KKRKK, that indicates the cellular destiny of this anchor protein. Binding to the…	GO:0006355|regulation of transcription, DNA-templated;GO:0006351|transcription, DNA-templated;	GO:0031594|neuromuscular junction;GO:0005634|nucleus;GO:0005667|transcription factor complex;	GO:0003723|RNA binding;	K18666	ASCC1; activating signal cointegrator complex subunit 1
ENSSSCG00000023133	11.993634437420656	15.795405323214002	5.755126374240678	3.7741786076034707	4.147881758910192	6.760682634094156	OSBPL6	protein_coding	chr15:83872782-84101064:+	gi|545874847|ref|XP_005657617.1|	4721	0.0	PREDICTED: oxysterol-binding protein-related protein 6 isoform X1 [Sus scrofa]	gi|927210561|ref|XM_005657560.2|	3012	0.0	PREDICTED: Sus scrofa oxysterol binding protein-like 6 (OSBPL6), transcript variant X1, mRNA	Q8BXR9	1761	0.0	Oxysterol-binding protein-related protein 6	.	.	.	.	pfam01237	Oxysterol_BP	Oxysterol-binding protein.	GO:0006869|lipid transport;	GO:0005829|cytosol;GO:0005789|endoplasmic reticulum membrane;GO:0031965|nuclear membrane;GO:0097038|perinuclear endoplasmic reticulum;GO:0005886|plasma membrane;	GO:0008289|lipid binding;	.	.
ENSSSCG00000008002	4.657531300954379	3.909694369025968	4.4837981799933235	4.05039427651746	7.438413988605673	6.111587493163109	NARFL	protein_coding	chr3:41042691-41053102:+	gi|927108962|ref|XP_013851217.1|	2466	0.0	PREDICTED: cytosolic Fe-S cluster assembly factor NARFL isoform X2 [Sus scrofa]	gi|927108961|ref|XM_013995763.1|	2091	0.0	PREDICTED: Sus scrofa nuclear prelamin A recognition factor-like (NARFL), transcript variant X2, mRNA	A4FV58	865	0.0	Cytosolic Fe-S cluster assembly factor NARFL	SPCC1450.10c	280	4e-80	COG4624	pfam02906	Fe_hyd_lg_C	Iron only hydrogenase large subunit, C-terminal domain.	GO:0002244|hematopoietic progenitor cell differentiation;GO:0016226|iron-sulfur cluster assembly;GO:0032364|oxygen homeostasis;GO:0006355|regulation of transcription, DNA-templated;GO:0001666|response to hypoxia;	GO:0097361|CIA complex;	GO:0051539|4 iron, 4 sulfur cluster binding;GO:0046872|metal ion binding;	.	.
ENSSSCG00000005037	4.578260818071475	4.124441573586939	3.3475062825314463	2.222527540469375	3.9865665686472105	3.9102478230058764	ERO1A	protein_coding	chr1:182265012-182318968:-	gi|212549619|ref|NP_001131099.1|	2519	0.0	ERO1-like protein alpha precursor [Sus scrofa]	gi|593761196|ref|XM_007119221.1|	2209	0.0	PREDICTED: Physeter catodon ERO1-like (S. cerevisiae) (ERO1L), transcript variant X2, mRNA	B6CVD7	974	0.0	ERO1-like protein alpha	SPCC1450.14c	222	4e-60	COG5061	pfam04137	ERO1	Endoplasmic Reticulum Oxidoreductin 1 (ERO1). Members of this family are required for the formation of disulphide bonds in the ER.	GO:0019471|4-hydroxyproline metabolic process;GO:0050873|brown fat cell differentiation;GO:0045454|cell redox homeostasis;GO:0006464|cellular protein modification process;GO:0051085|chaperone mediated protein folding requiring cofactor;GO:0030968|endoplasmic reticulum unfolded protein response;GO:0030198|extracellular matrix organization;GO:0070059|intrinsic apoptotic signaling pathway in respons…	GO:0005789|endoplasmic reticulum membrane;	GO:0016671|oxidoreductase activity, acting on a sulfur group of donors, disulfide as acceptor;GO:0003756|protein disulfide isomerase activity;GO:0015035|protein disulfide oxidoreductase activity;	K10950	ERO1L; ERO1-like protein alpha [EC:1.8.4.-]
ENSSSCG00000005036	0.37098937093240136	0.28961665385023355	0.22678214271982855	0.1813300072628692	0.3710488250089201	0.09344714332187526	GPR137C	protein_coding	chr1:182202767-182262943:+	gi|593768742|ref|XP_007122824.1|	1875	0.0	PREDICTED: integral membrane protein GPR137C [Physeter catodon]	gi|927097544|ref|XM_005659957.2|	2471	0.0	PREDICTED: Sus scrofa G protein-coupled receptor 137C (GPR137C), transcript variant X1, mRNA	Q8N3F9	628	0.0	Integral membrane protein GPR137C	.	.	.	.	pfam04247	SirB	Invasion gene expression up-regulator, SirB. SirB up-regulates Salmonella typhimurium invasion gene transcription. It is, however, not essential for the expression of these genes. Its function is unknown.	.	GO:0016021|integral component of membrane;	.	.	.
ENSSSCG00000008007	1.7252762040962601	1.4755694895187097	1.6349719262447264	1.2496130972439956	1.50514530975423	1.4613376804629383	WDR24	protein_coding	chr3:41085463-41095204:+	gi|311251734|ref|XP_003124754.1|	4262	0.0	PREDICTED: WD repeat-containing protein 24 isoform X1 [Sus scrofa]	gi|927108957|ref|XM_003124706.5|	2436	0.0	PREDICTED: Sus scrofa WD repeat domain 24 (WDR24), transcript variant X1, mRNA	Q8CFJ9	1560	0.0	WD repeat-containing protein 24	.	.	.	.	pfam04564	U-box	U-box domain. This domain is related to the Ring finger pfam00097 but lacks the zinc binding residues.	GO:0006914|autophagy;GO:0034198|cellular response to amino acid starvation;GO:0032008|positive regulation of TOR signaling;GO:0010506|regulation of autophagy;	GO:0061700|GATOR2 complex;	.	.	.
ENSSSCG00000005030	11.270566032491125	13.078164574485095	7.058363704565534	6.452582984765221	7.5071088559951935	5.719788582229029	NID2	protein_coding	chr1:181698940-181772768:-	gi|927097522|ref|XP_013848860.1|	6760	0.0	PREDICTED: nidogen-2 isoform X1 [Sus scrofa]	gi|927097521|ref|XM_013993406.1|	4983	0.0	PREDICTED: Sus scrofa nidogen 2 (osteonidogen) (NID2), transcript variant X1, mRNA	Q14112	657	0.0	Nidogen-2	.	.	.	.	pfam07474	G2F	G2F domain. Nidogen, an invariant component of basement membranes, is a multifunctional protein that interacts with most other major basement membrane proteins. The G2 fragment or (G2F domain) contains binding sites for collagen IV and perlecan. The structure is composed of an 11-stranded beta-barrel with a central helix. This domain is structurally related to that of green fluorescent protein pf…	GO:0071711|basement membrane organization;GO:0007155|cell adhesion;GO:0007160|cell-matrix adhesion;GO:0030198|extracellular matrix organization;	GO:0005604|basement membrane;GO:0070062|extracellular exosome;GO:0031012|extracellular matrix;GO:0005576|extracellular region;	GO:0005509|calcium ion binding;GO:0005518|collagen binding;	K06826	NID; nidogen (entactin)
ENSSSCG00000008004	3.461135707090862	2.9774379623135414	2.566669684144234	2.345902843437532	2.2720345293992588	1.9979041000471174	FAM173A	protein_coding	chr3:41053268-41062032:-	gi|311251729|ref|XP_003124753.1|	1025	2e-123	PREDICTED: protein FAM173A isoform X1 [Sus scrofa]	gi|545815368|ref|XM_003124705.2|	899	0.0	PREDICTED: Sus scrofa family with sequence similarity 173, member A (FAM173A), transcript variant X1, mRNA	Q9BQD7	345	8e-106	Protein FAM173A	APE1503	73.2	6e-13	COG0500	pfam14739	DUF4472	Domain of unknown function (DUF4472). This family is specific to the Chordates. Some members also carry Kinesin-motor domains at their N-terminus, Kinesin, pfam00225.	.	GO:0016021|integral component of membrane;	.	.	.
ENSSSCG00000008009	13.00597066452993	13.438602982457757	9.982626883478511	10.506075625808043	7.738620193429437	8.056893077673472	LMF1	protein_coding	chr3:40841289-40929181:+	gi|466011743|ref|XP_004270397.1|	2148	0.0	PREDICTED: lipase maturation factor 1 [Orcinus orca]	gi|371911394|dbj|AK396723.1|	1738	0.0	Sus scrofa mRNA, clone: PST010081G03, expressed in prostate	Q0P5C0	634	0.0	Lipase maturation factor 1	.	.	.	.	pfam06762	LMF1	Lipase maturation factor. This family of transmembrane proteins includes the lipase maturation factor, LMF1. Lipoprotein lipase and hepatic lipase require LMF1 to fold into their active states. The precise role of LMF1 in lipase folding has yet to be determined.	GO:0034382|chylomicron remnant clearance;GO:0006888|ER to Golgi vesicle-mediated transport;GO:0051006|positive regulation of lipoprotein lipase activity;GO:0033578|protein glycosylation in Golgi;GO:0051604|protein maturation;GO:0009306|protein secretion;GO:0090181|regulation of cholesterol metabolic process;GO:0090207|regulation of triglyceride metabolic process;GO:0006641|triglyceride metabolic …	GO:0005789|endoplasmic reticulum membrane;GO:0005794|Golgi apparatus;GO:0016021|integral component of membrane;	.	.	.
ENSSSCG00000005039	10.017676837401652	9.809069265125736	6.8735487054083615	4.899236320289175	4.805800993953062	6.891913134629394	STYX	protein_coding	chr1:182357607-182407784:+	gi|602679420|ref|XP_007446021.1|	1231	8e-154	PREDICTED: serine/threonine/tyrosine-interacting protein [Lipotes vexillifer]	gi|927097553|ref|XM_003121793.3|	4471	0.0	PREDICTED: Sus scrofa serine/threonine/tyrosine interacting protein (STYX), transcript variant X1, mRNA	Q5RDP3	368	1e-115	Serine/threonine/tyrosine-interacting protein	SPBC17A3.06	62.8	2e-09	COG2453	pfam00782	DSPc	Dual specificity phosphatase, catalytic domain. Ser/Thr and Tyr protein phosphatases. The enzyme's tertiary fold is highly similar to that of tyrosine-specific phosphatases, except for a "recognition" region.	GO:0045204|MAPK export from nucleus;GO:0070372|regulation of ERK1 and ERK2 cascade;	GO:0005737|cytoplasm;GO:0005829|cytosol;GO:0005634|nucleus;	GO:0008138|protein tyrosine/serine/threonine phosphatase activity;	K18042	STYX; serine/threonine/tyrosine-interacting protein
ENSSSCG00000005038	23.472984591875534	22.654732909995175	23.59890664949675	20.1863318902064	25.53554499965046	20.192750496305024	PSMC6	protein_coding	chr1:182318731-182357981:+	gi|335280279|ref|XP_001928782.2|	2039	0.0	PREDICTED: 26S protease regulatory subunit 10B [Sus scrofa]	gi|927097552|ref|XM_001928747.4|	1592	0.0	PREDICTED: Sus scrofa proteasome 26S subunit, ATPase 6 (PSMC6), mRNA	P62334	58.5	6e-08	26S protease regulatory subunit 10B	YOR259c	501	2e-175	COG1222	pfam00004	AAA	ATPase family associated with various cellular activities (AAA). AAA family proteins often perform chaperone-like functions that assist in the assembly, operation, or disassembly of protein complexes.	GO:0030433|ER-associated ubiquitin-dependent protein catabolic process;GO:0090261|positive regulation of inclusion body assembly;GO:0045899|positive regulation of RNA polymerase II transcriptional preinitiation complex assembly;	GO:0031597|cytosolic proteasome complex;GO:0070062|extracellular exosome;GO:0016234|inclusion body;GO:0016020|membrane;GO:0031595|nuclear proteasome complex;GO:0005634|nucleus;GO:0022624|proteasome accessory complex;GO:0000502|proteasome complex;GO:0008540|proteasome regulatory particle, base subcomplex;	GO:0005524|ATP binding;GO:0036402|proteasome-activating ATPase activity;GO:0017025|TBP-class protein binding;	K03064	PSMC6, RPT4; 26S proteasome regulatory subunit T4
ENSSSCG00000000231	0.0	0.04693662934911123	0.0	0.0	0.0	0.0	ANKRD33	protein_coding	chr5:17248664-17250938:+	gi|927128305|ref|XP_013843736.1|	1466	0.0	PREDICTED: ankyrin repeat domain-containing protein 33 isoform X3 [Sus scrofa]	gi|927128304|ref|XM_013988282.1|	984	0.0	PREDICTED: Sus scrofa ankyrin repeat domain 33 (ANKRD33), transcript variant X3, mRNA	Q7Z3H0	377	3e-129	Ankyrin repeat domain-containing protein 33	all2748	55.8	6e-08	COG0666	pfam12796	Ank_2	Ankyrin repeats (3 copies).	GO:0000122|negative regulation of transcription from RNA polymerase II promoter;GO:2000678|negative regulation of transcription regulatory region DNA binding;GO:0035914|skeletal muscle cell differentiation;	GO:0005829|cytosol;GO:0005634|nucleus;	.	.	.
ENSSSCG00000000232	2.618618608251712	3.002348264136054	2.5313143231829778	1.8192673327990392	2.4639297169926193	2.000497562320508	ACVRL1	protein_coding	chr5:17263907-17285874:+	gi|927128285|ref|XP_013843731.1|	2803	0.0	PREDICTED: serine/threonine-protein kinase receptor R3 isoform X1 [Sus scrofa]	gi|927128284|ref|XM_013988277.1|	3991	0.0	PREDICTED: Sus scrofa activin A receptor type II-like 1 (ACVRL1), transcript variant X1, mRNA	P37023	660	0.0	Serine/threonine-protein kinase receptor R3	.	.	.	.	pfam00069	Pkinase	Protein kinase domain.	GO:0001525|angiogenesis;GO:0060840|artery development;GO:0008015|blood circulation;GO:0002043|blood vessel endothelial cell proliferation involved in sprouting angiogenesis;GO:0001955|blood vessel maturation;GO:0001974|blood vessel remodeling;GO:0030509|BMP signaling pathway;GO:0071773|cellular response to BMP stimulus;GO:0071560|cellular response to transforming growth factor beta stimulus;GO:00…	GO:0009986|cell surface;GO:0030425|dendrite;GO:0005887|integral component of plasma membrane;GO:0043025|neuronal cell body;GO:0005886|plasma membrane;	GO:0048185|activin binding;GO:0016361|activin receptor activity, type I;GO:0005524|ATP binding;GO:0098821|BMP receptor activity;GO:0046872|metal ion binding;GO:0019901|protein kinase binding;GO:0004674|protein serine/threonine kinase activity;GO:0004702|receptor signaling protein serine/threonine kinase activity;GO:0046332|SMAD binding;GO:0050431|transforming growth factor beta binding;GO:0005025…	K13594	ACVRL1, ALK1; activin receptor-like kinase 1 [EC:2.7.11.30]
ENSSSCG00000000233	4.490450260052909	9.179132531527689	6.566602932531924	3.01591857780814	2.975155177798979	3.2346287794714765	ACVR1B	protein_coding	chr5:17314276-17350723:+	gi|743736574|ref|XP_010962622.1|	2415	0.0	PREDICTED: activin receptor type-1B [Camelus bactrianus]	gi|927128213|ref|XM_013988267.1|	4397	0.0	PREDICTED: Sus scrofa activin A receptor, type IB (ACVR1B), transcript variant X2, mRNA	P36896	931	0.0	Activin receptor type-1B	.	.	.	.	pfam00069	Pkinase	Protein kinase domain.	GO:0032924|activin receptor signaling pathway;GO:0007417|central nervous system development;GO:0046545|development of primary female sexual characteristics;GO:0097191|extrinsic apoptotic signaling pathway;GO:0000082|G1/S transition of mitotic cell cycle;GO:0001942|hair follicle development;GO:0001701|in utero embryonic development;GO:0030308|negative regulation of cell growth;GO:0010629|negative …	GO:0048179|activin receptor complex;GO:0009986|cell surface;GO:0070062|extracellular exosome;GO:0005887|integral component of plasma membrane;GO:0005886|plasma membrane;GO:0043235|receptor complex;	GO:0016361|activin receptor activity, type I;GO:0005524|ATP binding;GO:0034711|inhibin binding;GO:0046872|metal ion binding;GO:0004674|protein serine/threonine kinase activity;GO:0004702|receptor signaling protein serine/threonine kinase activity;GO:0046332|SMAD binding;GO:0004675|transmembrane receptor protein serine/threonine kinase activity;GO:0031625|ubiquitin protein ligase binding;	K13567	ACVR1B, ALK4; activin receptor type-1B [EC:2.7.11.30]
ENSSSCG00000000234	0.9119491831146795	1.059285613942047	0.5332279073033441	0.8740324491432414	2.882841951721478	1.5197315944537575	GRASP	protein_coding	chr5:17358042-17367324:+	gi|927128313|ref|XP_003126196.2|	1387	7e-177	PREDICTED: general receptor for phosphoinositides 1-associated scaffold protein [Sus scrofa]	gi|927128312|ref|XM_003126148.3|	2034	0.0	PREDICTED: Sus scrofa GRP1 (general receptor for phosphoinositides 1)-associated scaffold protein (GRASP), mRNA	Q7Z6J2	467	2e-152	General receptor for phosphoinositides 1-associated scaffold protein	.	.	.	.	pfam00595	PDZ	PDZ domain (Also known as DHR or GLGF). PDZ domains are found in diverse signaling proteins.	GO:0008104|protein localization;GO:0007165|signal transduction;	GO:0030054|cell junction;GO:0048471|perinuclear region of cytoplasm;GO:0045211|postsynaptic membrane;	.	.	.
ENSSSCG00000000238	0.0	0.0	0.0	0.0	0.039811974554234436	0.0	ENSSSCG00000000238	protein_coding	chr5:17736039-17747580:-	gi|350583995|ref|XP_003355441.2|	2005	0.0	PREDICTED: keratin, type II cytoskeletal 5-like [Sus scrofa]	gi|927128803|ref|XM_003355393.4|	1355	0.0	PREDICTED: Sus scrofa keratin, type II cytoskeletal 5-like (LOC100621351), mRNA	O95678	587	0.0	Keratin, type II cytoskeletal 75	.	.	.	.	pfam00038	Filament	Intermediate filament protein.	GO:0002244|hematopoietic progenitor cell differentiation;	GO:0070062|extracellular exosome;GO:0005882|intermediate filament;GO:0045095|keratin filament;	GO:0005198|structural molecule activity;	K07605	KRT2; type II keratin, basic
ENSSSCG00000004921	1.4113339390046513	1.369434498488645	0.9865393543249847	0.7459447545660861	1.6553151553862213	2.084101890213994	ATP8B1	protein_coding	chr1:162936675-163065872:+	gi|335308997|ref|XP_003121763.2|	6312	0.0	PREDICTED: phospholipid-transporting ATPase IC [Sus scrofa]	gi|927223849|ref|XM_003121715.4|	3835	0.0	PREDICTED: Sus scrofa ATPase, aminophospholipid transporter, class I, type 8B, member 1 (ATP8B1), mRNA	O43520	112	2e-23	Phospholipid-transporting ATPase IC	.	.	.	.	pfam13246	Hydrolase_like2	Putative hydrolase of sodium-potassium ATPase alpha subunit. This is a putative hydrolase of the sodium-potassium ATPase alpha subunit.	GO:0015721|bile acid and bile salt transport;GO:0008206|bile acid metabolic process;GO:0006855|drug transmembrane transport;GO:0007030|Golgi organization;GO:0060119|inner ear receptor cell development;GO:0034220|ion transmembrane transport;GO:0045892|negative regulation of transcription, DNA-templated;GO:0045332|phospholipid translocation;GO:0032534|regulation of microvillus assembly;GO:0007605|s…	GO:0016324|apical plasma membrane;GO:0031526|brush border membrane;GO:0005783|endoplasmic reticulum;GO:0005794|Golgi apparatus;GO:0005887|integral component of plasma membrane;GO:0005886|plasma membrane;GO:0032420|stereocilium;	GO:0005524|ATP binding;GO:1901612|cardiolipin binding;GO:0000287|magnesium ion binding;GO:0004012|phospholipid-translocating ATPase activity;	K01530	E3.6.3.1; phospholipid-translocating ATPase [EC:3.6.3.1]
ENSSSCG00000004923	0.039097310767139994	0.03730431988600774	0.03505304056511703	0.0	0.09350855233378906	0.03610961676998916	SLC51B	protein_coding	chr1:163081140-163089489:+	gi|335309033|ref|XP_003121764.2|	590	2e-72	PREDICTED: organic solute transporter subunit beta [Sus scrofa]	gi|927223888|ref|XM_005658570.2|	1039	0.0	PREDICTED: Sus scrofa solute carrier family 51, beta subunit (SLC51B), transcript variant X1, mRNA	A0JNM1	162	2e-44	Organic solute transporter subunit beta	.	.	.	.	pfam15048	OSTbeta	Organic solute transporter subunit beta protein.	GO:0015721|bile acid and bile salt transport;GO:0070863|positive regulation of protein exit from endoplasmic reticulum;GO:0060050|positive regulation of protein glycosylation;GO:0090314|positive regulation of protein targeting to membrane;GO:0031647|regulation of protein stability;	GO:0016021|integral component of membrane;GO:0005886|plasma membrane;GO:0043234|protein complex;	GO:0046982|protein heterodimerization activity;GO:0005215|transporter activity;	K14361	OSTBETA, OSTB, SLC51A2; organic solute transporter subunit beta
ENSSSCG00000004926	3.4548252596120568	5.493980025140552	4.749429793969631	3.4177855268307713	3.5254880611548476	2.637743158770445	PDCD7	protein_coding	chr1:163157961-163170215:-	gi|927097130|ref|XP_003480489.2|	1084	2e-139	PREDICTED: programmed cell death protein 7 [Sus scrofa]	gi|927097129|ref|XM_003480441.3|	1368	0.0	PREDICTED: Sus scrofa programmed cell death 7 (PDCD7), mRNA	Q8N8D1	366	1e-119	Programmed cell death protein 7	.	.	.	.	pfam04632	FUSC	Fusaric acid resistance protein family. This family includes a conserved region found in two proteins associated with fusaric acid resistance, from Burkholderia cepacia and Klebsiella oxytoca. These proteins are likely to be membrane transporter proteins.	GO:0006915|apoptotic process;GO:0000398|mRNA splicing, via spliceosome;GO:0051384|response to glucocorticoid;GO:0008380|RNA splicing;	GO:0005654|nucleoplasm;GO:0005689|U12-type spliceosomal complex;	.	.	.
ENSSSCG00000004927	25.639615666499104	25.389447566758133	24.85126996805774	23.248518002402452	25.954101079805227	26.09634886434245	CLPX	protein_coding	chr1:163173886-163266039:-	gi|731253381|ref|XP_010639439.1|	2769	0.0	PREDICTED: ATP-dependent Clp protease ATP-binding subunit clpX-like, mitochondrial [Fukomys damarensis]	gi|545802055|ref|XM_003121718.4|	3738	0.0	PREDICTED: Sus scrofa caseinolytic mitochondrial matrix peptidase chaperone subunit (CLPX), mRNA	Q5R7N3	1008	0.0	ATP-dependent Clp protease ATP-binding subunit clpX-like, mitochondrial	PM1977	333	2e-101	COG1219	pfam07724	AAA_2	AAA domain (Cdc48 subfamily). This Pfam entry includes some of the AAA proteins not detected by the pfam00004 model.	GO:0006457|protein folding;GO:0051603|proteolysis involved in cellular protein catabolic process;	GO:0009368|endopeptidase Clp complex;GO:0005759|mitochondrial matrix;GO:0042645|mitochondrial nucleoid;	GO:0005524|ATP binding;GO:0046872|metal ion binding;	.	.
ENSSSCG00000004928	26.493763760513907	38.33317616140012	18.435333967756094	27.9360577050147	27.388727900653215	16.763223496255904	CILP	protein_coding	chr1:163236864-163271185:-	gi|927097128|ref|XP_013841300.1|	6243	0.0	PREDICTED: cartilage intermediate layer protein 1 isoform X1 [Sus scrofa]	gi|927097127|ref|XM_013985846.1|	4460	0.0	PREDICTED: Sus scrofa cartilage intermediate layer protein, nucleotide pyrophosphohydrolase (CILP), transcript variant X1, mRNA	O75339	2169	0.0	Cartilage intermediate layer protein 1	.	.	.	.	pfam13330	Mucin2_WxxW	Mucin-2 protein WxxW repeating region. This family is repeating region found on mucins 2 and 5. The function is not known, but the repeat can be present in up to 32 copies, as in a member from Branchiostoma floridae. The region carries a highly conserved WxxW sequence motif and also has at least six well conserved cysteine residues.	GO:0043569|negative regulation of insulin-like growth factor receptor signaling pathway;	GO:0070062|extracellular exosome;GO:0031012|extracellular matrix;GO:0005615|extracellular space;GO:0005578|proteinaceous extracellular matrix;	.	.	.
ENSSSCG00000004929	2.3450949846048617	2.2597035926158937	1.70699294265888	1.4231307822564871	2.7766012545749974	1.7155565727143849	PARP16	protein_coding	chr1:163292783-163320021:-	gi|593717564|ref|XP_007105207.1|	1583	0.0	PREDICTED: mono [ADP-ribose] polymerase PARP16 isoform X5 [Physeter catodon]	gi|545802056|ref|XM_005654484.1|	2039	0.0	PREDICTED: Sus scrofa poly (ADP-ribose) polymerase family, member 16 (PARP16), partial mRNA	Q8N5Y8	492	2e-167	Mono [ADP-ribose] polymerase PARP16	.	.	.	.	pfam00644	PARP	Poly(ADP-ribose) polymerase catalytic domain. Poly(ADP-ribose) polymerase catalyses the covalent attachment of ADP-ribose units from NAD+ to itself and to a limited number of other DNA binding proteins, which decreases their affinity for DNA. Poly(ADP-ribose) polymerase is a regulatory component induced by DNA damage. The carboxyl-terminal region is the most highly conserved region of the protein…	GO:0006987|activation of signaling protein activity involved in unfolded protein response;GO:0030968|endoplasmic reticulum unfolded protein response;GO:0060548|negative regulation of cell death;GO:0071902|positive regulation of protein serine/threonine kinase activity;GO:0006471|protein ADP-ribosylation;GO:0070213|protein auto-ADP-ribosylation;	GO:0005783|endoplasmic reticulum;GO:0005789|endoplasmic reticulum membrane;GO:0071782|endoplasmic reticulum tubular network;GO:0016021|integral component of membrane;GO:0016020|membrane;GO:0005635|nuclear envelope;	GO:0019900|kinase binding;GO:0003950|NAD+ ADP-ribosyltransferase activity;GO:0043539|protein serine/threonine kinase activator activity;	K00774	PARP16; poly [ADP-ribose] polymerase 16 [EC:2.4.2.30]
ENSSSCG00000040904	0.6479023592070429	0.43502241835761624	0.3119554724045927	1.9094505235129637	1.3659260931152117	1.2078647091896593	CLDN1	protein_coding	chr13:127710737-127730765:-	gi|347300348|ref|NP_001231468.1|	879	2e-104	claudin-1 [Sus scrofa]	gi|942059515|ref|XM_005897671.2|	1692	0.0	PREDICTED: Bos mutus claudin 1 (CLDN1), mRNA	Q6L708	336	1e-103	Claudin-1	.	.	.	.	pfam00822	PMP22_Claudin	PMP-22/EMP/MP20/Claudin family.	GO:0070830|bicellular tight junction assembly;GO:0016338|calcium-independent cell-cell adhesion via plasma membrane cell-adhesion molecules;GO:0061436|establishment of skin barrier;GO:0051291|protein heterooligomerization;GO:0051260|protein homooligomerization;	GO:0016324|apical plasma membrane;GO:0005923|bicellular tight junction;GO:0005887|integral component of plasma membrane;GO:0016328|lateral plasma membrane;	GO:0042802|identical protein binding;GO:0005198|structural molecule activity;	K06087	CLDN; claudin
ENSSSCG00000040905	0.029888037158647945	0.04277607118191502	0.0	0.0	0.0	0.04140613049707667	FAAP24	protein_coding	chr6:42815458-42822260:+	gi|335289453|ref|XP_003355891.1|	1130	2e-140	PREDICTED: Fanconi anemia-associated protein of 24 kDa [Sus scrofa]	gi|927138432|ref|XM_013988557.1|	1334	0.0	PREDICTED: Sus scrofa rhophilin, Rho GTPase binding protein 2 (RHPN2), partial mRNA	Q2KHY5	318	8e-109	Fanconi anemia core complex-associated protein 24	.	.	.	.	pfam12826	HHH_2	Helix-hairpin-helix motif. The HhH domain of DisA, a bacterial checkpoint control protein, is a DNA-binding domain.	GO:0006281|DNA repair;	GO:0043240|Fanconi anaemia nuclear complex;	GO:0003677|DNA binding;	K10898	FAAP24; fanconi anemia-associated protein
ENSSSCG00000040903	1.2925110971254516	1.479884313595507	2.317624564423032	2.7796823466296297	1.9784209472598382	0.9549931588110075	ENSSSCG00000040903	protein_coding	chr6:146168770-146170394:-	gi|585639354|ref|XP_006879898.1|	235	4e-22	PREDICTED: actin-related protein 2/3 complex subunit 4-like [Elephantulus edwardii]	gi|322487432|emb|FN673799.1|	246	1e-124	Sus scrofa BAC clone KNP_1295F6	.	.	.	.	.	.	.	.	pfam08003	Methyltransf_9	Protein of unknown function (DUF1698). This family contains many hypothetical proteins. It also includes two putative methyltransferase proteins.	.	.	.	.	.
ENSSSCG00000036095	0.23148256996648764	0.09094517316559872	0.0610405147622261	0.08785197253342973	0.13026682027247952	0.05030432875373	ACOT12	protein_coding	chr2:89855166-89905197:-	gi|466067481|ref|XP_004281697.1|	2558	0.0	PREDICTED: acyl-coenzyme A thioesterase 12 [Orcinus orca]	gi|594691587|ref|XM_007193064.1|	1641	0.0	PREDICTED: Balaenoptera acutorostrata scammoni acyl-CoA thioesterase 12 (ACOT12), mRNA	Q8WYK0	800	0.0	Acyl-coenzyme A thioesterase 12	BH2302	82.4	2e-16	COG1607	pfam01852	START	START domain.	GO:0006084|acetyl-CoA metabolic process;GO:0006637|acyl-CoA metabolic process;GO:0006631|fatty acid metabolic process;GO:0035338|long-chain fatty-acyl-CoA biosynthetic process;GO:0006090|pyruvate metabolic process;	GO:0005829|cytosol;	GO:0003986|acetyl-CoA hydrolase activity;GO:0047617|acyl-CoA hydrolase activity;GO:0005524|ATP binding;GO:0052689|carboxylic ester hydrolase activity;GO:0008289|lipid binding;	K01067	E3.1.2.1, ACH1; acetyl-CoA hydrolase [EC:3.1.2.1]
ENSSSCG00000036094	4.0352884480977504	5.237271197258624	4.898735723812789	4.244828602528993	3.704602626885431	4.1783220168416015	ENSSSCG00000036094	protein_coding	chr13:130282121-130307855:+	gi|927201992|ref|XP_003132643.2|	839	5e-99	PREDICTED: phospholipid-metabolizing enzyme A-C1, partial [Sus scrofa]	gi|927202001|ref|XM_005670077.2|	1087	0.0	PREDICTED: Sus scrofa ATPase type 13A5 (ATP13A5), mRNA	Q9HDD0	279	3e-84	Phospholipid-metabolizing enzyme A-C1	.	.	.	.	pfam04970	LRAT	Lecithin retinol acyltransferase. The full-length members of this family are representatives of a novel class II tumor-suppressor family, designated as H-REV107-like. This domain is the catalytic N-terminal proline-rich region of the protein. The downstream region is a putative C-terminal transmembrane domain which is found to be crucial for cellular localisation, but not necessary for the enzyme…	GO:0016042|lipid catabolic process;	GO:0016021|integral component of membrane;	GO:0016787|hydrolase activity;GO:0016740|transferase activity;	.	.
ENSSSCG00000036097	0.03167107589048592	0.0	0.0	0.011352001896069117	0.0	0.05850174299250647	ENSSSCG00000036097	protein_coding	chr7:77028600-77044110:-	gi|927160636|ref|XP_005666338.2|	768	2e-91	PREDICTED: uncharacterized protein LOC100626606 [Sus scrofa]	gi|115552798|dbj|AK239392.1|	856	0.0	Sus scrofa mRNA, clone:THY010100E02, expressed in thymus	P06322	122	9e-32	T-cell receptor alpha chain V region RL-5	.	.	.	.	pfam07686	V-set	Immunoglobulin V-set domain. This domain is found in antibodies as well as neural protein P0 and CTL4 amongst others.	GO:0006084|acetyl-CoA metabolic process;GO:0006637|acyl-CoA metabolic process;GO:0006631|fatty acid metabolic process;GO:0035338|long-chain fatty-acyl-CoA biosynthetic process;GO:0006090|pyruvate metabolic process;	GO:0005829|cytosol;	GO:0003986|acetyl-CoA hydrolase activity;GO:0047617|acyl-CoA hydrolase activity;GO:0005524|ATP binding;GO:0052689|carboxylic ester hydrolase activity;GO:0008289|lipid binding;	.	.
ENSSSCG00000036096	0.41871729734463364	0.3424414700243687	0.2145169742024948	0.257284572918532	0.45780158035504415	0.16573724285172886	ENSSSCG00000036096	lincRNA	chr3:39261903-39264019:-	.	.	.	.	.	.	.	.	.	.	.	.	.	.	.	.	pfam03154	Atrophin-1	Atrophin-1 family. Atrophin-1 is the protein product of the dentatorubral-pallidoluysian atrophy (DRPLA) gene. DRPLA OMIM:125370 is a progressive neurodegenerative disorder. It is caused by the expansion of a CAG repeat in the DRPLA gene on chromosome 12p. This results in an extended polyglutamine region in atrophin-1, that is thought to confer toxicity to the protein, possibly through altering i…	.	.	.	.	.
ENSSSCG00000036091	1.5571196681905046	1.6249960013336493	1.1779167169822276	1.4476372260437036	1.4120711762169214	0.9138114287220239	MORC4	protein_coding	chrX:87369319-87427370:-	gi|602689081|ref|XP_007456759.1|	4066	0.0	PREDICTED: MORC family CW-type zinc finger protein 4 isoform X2 [Lipotes vexillifer]	gi|602689080|ref|XM_007456697.1|	3062	0.0	PREDICTED: Lipotes vexillifer MORC family CW-type zinc finger 4 (MORC4), transcript variant X2, mRNA	Q8TE76	149	3e-35	MORC family CW-type zinc finger protein 4	.	.	.	.	pfam07496	zf-CW	CW-type Zinc Finger. This domain appears to be a zinc finger. The alignment shows four conserved cysteine residues and a conserved tryptophan. It was first identified by, and is predicted to be a "highly specialized mononuclear four-cysteine zinc finger...that plays a role in DNA binding and/or promoting protein-protein interactions in complicated eukaryotic processes including...chromatin methyl…	.	GO:0005654|nucleoplasm;	GO:0008270|zinc ion binding;	.	.
ENSSSCG00000011316	0.042894462959751446	0.01023183395604507	0.06730046929388503	0.02306227422777145	0.020518030809795782	0.0	CCR9	protein_coding	chr13:29033408-29055823:+	gi|48675913|ref|NP_001001624.1|	1889	0.0	C-C chemokine receptor type 9 [Sus scrofa]	gi|41688287|dbj|AP006184.1|	5788	0.0	Sus scrofa CC chemokine receptor genes (CCR9, CXCR6, FYCO1), complete cds, clone: 0268F11	P51686	674	0.0	C-C chemokine receptor type 9	.	.	.	.	pfam00001	7tm_1	7 transmembrane receptor (rhodopsin family). This family contains, amongst other G-protein-coupled receptors (GCPRs), members of the opsin family, which have been considered to be typical members of the rhodopsin superfamily. They share several motifs, mainly the seven transmembrane helices, GCPRs of the rhodopsin superfamily. All opsins bind a chromophore, such as 11-cis-retinal. The function of…	GO:0002305|CD8-positive, gamma-delta intraepithelial T cell differentiation;GO:0006968|cellular defense response;GO:0006935|chemotaxis;GO:0007186|G-protein coupled receptor signaling pathway;GO:0006955|immune response;GO:0007204|positive regulation of cytosolic calcium ion concentration;	GO:0009986|cell surface;GO:0005887|integral component of plasma membrane;GO:0005886|plasma membrane;	GO:0016493|C-C chemokine receptor activity;GO:0004950|chemokine receptor activity;	K04184	CCR9; C-C chemokine receptor type 9
ENSSSCG00000026079	0.9970799892110628	0.49329477119850235	0.33108922348900455	0.03970974780899471	0.07065789097356565	0.03410689852896455	TKTL2	protein_coding	chr8:52326545-52328412:-	gi|927167469|ref|XP_013834160.1|	2970	0.0	PREDICTED: LOW QUALITY PROTEIN: transketolase-like protein 2 [Sus scrofa]	gi|927167481|ref|XM_013978708.1|	1016	0.0	PREDICTED: Sus scrofa transketolase-like protein 2 (LOC100738805), mRNA	Q2NKZ4	992	0.0	Transketolase-like protein 2	all4052	494	2e-166	COG0021	pfam00456	Transketolase_N	Transketolase, thiamine diphosphate binding domain. This family includes transketolase enzymes EC:2.2.1.1. and also partially matches to 2-oxoisovalerate dehydrogenase beta subunit EC:1.2.4.4. Both these enzymes utilize thiamine pyrophosphate as a cofactor, suggesting there may be common aspects in their mechanism of catalysis.	GO:0008152|metabolic process;	GO:0005737|cytoplasm;	GO:0046872|metal ion binding;GO:0004802|transketolase activity;	K00615	E2.2.1.1, tktA, tktB; transketolase [EC:2.2.1.1]
ENSSSCG00000011885	43.13387492939263	49.15797023482937	41.512673601577944	52.41928800608721	33.9214063368535	32.65122285000923	FBXO40	protein_coding	chr13:138881514-138905399:-	gi|545192467|ref|XP_005602003.1|	3264	0.0	PREDICTED: F-box only protein 40 [Equus caballus]	gi|927202350|ref|XM_013980890.1|	4492	0.0	PREDICTED: Sus scrofa F-box protein 40 (FBXO40), mRNA	Q9UH90	1230	0.0	F-box only protein 40	.	.	.	.	pfam02176	zf-TRAF	TRAF-type zinc finger.	GO:0042692|muscle cell differentiation;	GO:0005737|cytoplasm;	GO:0061630|ubiquitin protein ligase activity;GO:0008270|zinc ion binding;	K10315	FBXO40; F-box protein 40
ENSSSCG00000011884	1.6476675682197406	1.5070533671031647	0.6010801856877179	0.9041993773642667	1.1305749767568287	1.7631402742399398	HCLS1	protein_coding	chr13:138852433-138890721:+	gi|927202379|ref|XP_013836417.1|	2110	0.0	PREDICTED: hematopoietic lineage cell-specific protein [Sus scrofa]	gi|927202350|ref|XM_013980890.1|	3556	0.0	PREDICTED: Sus scrofa F-box protein 40 (FBXO40), mRNA	P14317	720	0.0	Hematopoietic lineage cell-specific protein	.	.	.	.	pfam02218	HS1_rep	Repeat in HS1/Cortactin. The function of this repeat is unknown. Seven copies are found in cortactin and four copies are found in HS1. The repeats are always found amino terminal to an SH3 domain pfam00018.	GO:0030041|actin filament polymerization;GO:0071345|cellular response to cytokine stimulus;GO:0030218|erythrocyte differentiation;GO:0035556|intracellular signal transduction;GO:2000107|negative regulation of leukocyte apoptotic process;GO:0000122|negative regulation of transcription from RNA polymerase II promoter;GO:2000251|positive regulation of actin cytoskeleton reorganization;GO:0008284|pos…	GO:0005737|cytoplasm;GO:0016020|membrane;GO:0005739|mitochondrion;GO:0005634|nucleus;GO:0005667|transcription factor complex;	GO:0019901|protein kinase binding;GO:0001085|RNA polymerase II transcription factor binding;	K06106	CTTN, EMS1; cortactin
ENSSSCG00000011881	0.8645651474747951	0.575523105027992	0.8382258127999421	0.8431886819347771	0.9521358245686787	0.8077826455780922	IQCB1	protein_coding	chr13:138681330-138743791:+	gi|311269929|ref|XP_003132693.1|	2806	0.0	PREDICTED: IQ calmodulin-binding motif-containing protein 1 [Sus scrofa]	gi|927202368|ref|XM_003132645.4|	2260	0.0	PREDICTED: Sus scrofa IQ motif containing B1 (IQCB1), transcript variant X1, mRNA	Q8BP00	910	0.0	IQ calmodulin-binding motif-containing protein 1	.	.	.	.	pfam00612	IQ	IQ calmodulin-binding motif. Calmodulin-binding motif.	GO:0042384|cilium assembly;GO:0048496|maintenance of organ identity;GO:0045494|photoreceptor cell maintenance;	GO:0005813|centrosome;GO:0005737|cytoplasm;GO:0070062|extracellular exosome;GO:0045171|intercellular bridge;GO:0015630|microtubule cytoskeleton;GO:0005654|nucleoplasm;GO:0032391|photoreceptor connecting cilium;GO:0001750|photoreceptor outer segment;	GO:0005516|calmodulin binding;GO:0019899|enzyme binding;	K16774	IQCB1, NPHP5; IQ calmodulin-binding motif-containing protein 1
ENSSSCG00000011882	4.595639118986902	4.745462368201809	3.2974188558629285	2.6413811979336836	3.686373643859653	3.365646958647516	GOLGB1	protein_coding	chr13:138771381-138845995:+	gi|927202376|ref|XP_013836411.1|	14525	0.0	PREDICTED: golgin subfamily B member 1 isoform X2 [Sus scrofa]	gi|927202375|ref|XM_013980957.1|	9667	0.0	PREDICTED: Sus scrofa golgin B1 (GOLGB1), transcript variant X2, mRNA	Q14789	4623	0.0	Golgin subfamily B member 1	.	.	.	.	pfam01576	Myosin_tail_1	Myosin tail. The myosin molecule is a multi-subunit complex made up of two heavy chains and four light chains it is a fundamental contractile protein found in all eukaryote cell types. This family consists of the coiled-coil myosin heavy chain tail region. The coiled-coil is composed of the tail from two molecules of myosin. These can then assemble into the macromolecular thick filament. The coil…	GO:0006888|ER to Golgi vesicle-mediated transport;GO:0007030|Golgi organization;	GO:0005801|cis-Golgi network;GO:0005793|endoplasmic reticulum-Golgi intermediate compartment;GO:0005794|Golgi apparatus;GO:0000139|Golgi membrane;GO:0005795|Golgi stack;GO:0016021|integral component of membrane;GO:0016020|membrane;	GO:0044822|poly(A) RNA binding;GO:0043565|sequence-specific DNA binding;GO:0003700|transcription factor activity, sequence-specific DNA binding;	.	.
ENSSSCG00000011889	9.56091542058047	9.113708361504244	6.952873693269096	5.48050845647544	5.849320797084716	5.867112225674009	GSK3B	protein_coding	chr13:140136158-140369575:+	gi|301758902|ref|XP_002915300.1|	2169	0.0	PREDICTED: glycogen synthase kinase-3 beta isoform X1 [Ailuropoda melanoleuca]	gi|585181184|ref|XM_006742174.1|	5182	0.0	PREDICTED: Leptonychotes weddellii glycogen synthase kinase 3 beta (GSK3B), transcript variant X1, mRNA	P49841	800	0.0	Glycogen synthase kinase-3 beta	SPAC1687.15	464	4e-146	COG0515	pfam00069	Pkinase	Protein kinase domain.	GO:0009887|organ morphogenesis;GO:0007409|axonogenesis;GO:0060070|canonical Wnt signaling pathway;GO:0044337|canonical Wnt signaling pathway involved in positive regulation of apoptotic process;GO:0016477|cell migration;GO:0035729|cellular response to hepatocyte growth factor stimulus;GO:0036016|cellular response to interleukin-3;GO:0007623|circadian rhythm;GO:0007212|dopamine receptor signaling …	GO:0030877|beta-catenin destruction complex;GO:0005813|centrosome;GO:0005737|cytoplasm;GO:0005829|cytosol;GO:0043198|dendritic shaft;GO:0030426|growth cone;GO:0030529|ribonucleoprotein complex;GO:0005739|mitochondrion;GO:0043025|neuronal cell body;GO:0005634|nucleus;GO:0048471|perinuclear region of cytoplasm;GO:0005886|plasma membrane;GO:0098794|postsynapse;	GO:0005524|ATP binding;GO:0008013|beta-catenin binding;GO:0016301|kinase activity;GO:0051059|NF-kappaB binding;GO:0002039|p53 binding;GO:0034236|protein kinase A catalytic subunit binding;GO:0004672|protein kinase activity;GO:0019901|protein kinase binding;GO:0004674|protein serine/threonine kinase activity;GO:0001085|RNA polymerase II transcription factor binding;GO:0050321|tau-protein kinase ac…	K03083	GSK3B; glycogen synthase kinase 3 beta [EC:2.7.11.26]
ENSSSCG00000011888	0.09745786871690709	0.023247120062025152	0.0	0.039298780173196574	0.04661775471735897	0.02250261093114091	GPR156	protein_coding	chr13:139974453-140074173:+	gi|311269942|ref|XP_003132698.1|	3522	0.0	PREDICTED: probable G-protein coupled receptor 156 [Sus scrofa]	gi|927202388|ref|XM_003132650.3|	4284	0.0	PREDICTED: Sus scrofa G protein-coupled receptor 156 (GPR156), mRNA	Q8NFN8	662	0.0	Probable G-protein coupled receptor 156	.	.	.	.	pfam00003	7tm_3	7 transmembrane sweet-taste receptor of 3 GCPR. This is a domain of seven transmembrane regions that forms the C-terminus of some subclass 3 G-coupled-protein receptors. It is often associated with a downstream cysteine-rich linker domain, NCD3G pfam07562, which is the human sweet-taste receptor, and the N-terminal domain, ANF_receptor pfam01094. The seven TM regions assemble in such a way as to …	.	GO:0016021|integral component of membrane;GO:0005886|plasma membrane;	GO:0004965|G-protein coupled GABA receptor activity;	K04617	GPR156, GABABL; gamma-aminobutyric acid type B receptor-like
ENSSSCG00000007868	0.014846411250765322	0.0	0.0	0.0	0.0	0.0	TMC5	protein_coding	chr3:26211209-26286860:-	gi|927108359|ref|XP_013851072.1|	5234	0.0	PREDICTED: transmembrane channel-like protein 5 isoform X1 [Sus scrofa]	gi|927108358|ref|XM_013995618.1|	3740	0.0	PREDICTED: Sus scrofa transmembrane channel-like 5 (TMC5), transcript variant X1, mRNA	Q6UXY8	1345	0.0	Transmembrane channel-like protein 5	.	.	.	.	pfam07810	TMC	TMC domain. These sequences are similar to a region conserved amongst various protein products of the transmembrane channel-like (TMC) gene family, such as Transmembrane channel-like protein 3 and EVIN2 - this region is termed the TMC domain. Mutations in these genes are implicated in a number of human conditions, such as deafness and epidermodysplasia verruciformis. TMC proteins are thought to h…	GO:0006811|ion transport;	GO:0070062|extracellular exosome;GO:0016021|integral component of membrane;	.	.	.
ENSSSCG00000031379	0.0	0.0	0.0	0.0	0.6568975801448681	0.0	HOXA11-AS1_1	misc_RNA	chr18:45388176-45388271:-	gi|965793222|ref|XP_014964406.1|	163	3e-12	PREDICTED: homeobox protein Hox-A11 isoform X2 [Ovis aries musimon]	gi|965932213|ref|XM_015095335.1|	94	1e-40	PREDICTED: Ovis aries homeobox A11 (HOXA11), transcript variant X1, mRNA	.	.	.	.	.	.	.	.	pfam11982	DUF3483	Domain of unknown function (DUF3483). This presumed domain is functionally uncharacterized. This domain is found in bacteria. This domain is about 230 amino acids in length. This domain is found associated with pfam02754.	.	.	.	.	.
ENSSSCG00000031378	0.6244297845667853	0.4403691995769168	0.5598380589102587	0.21895150279774164	0.42855262230208857	0.7396968736774922	KBTBD6	protein_coding	chr11:25706139-25710994:+	gi|470655303|ref|XP_004330172.1|	3086	0.0	PREDICTED: kelch repeat and BTB domain-containing protein 6-like [Tursiops truncatus]	gi|371923548|dbj|AK400175.1|	2503	0.0	Sus scrofa mRNA, clone: BFLT10064G12, expressed in brain (frontal lobe)	Q86V97	1144	0.0	Kelch repeat and BTB domain-containing protein 6	.	.	.	.	pfam00651	BTB	BTB/POZ domain. The BTB (for BR-C, ttk and bab) or POZ (for Pox virus and Zinc finger) domain is present near the N-terminus of a fraction of zinc finger (pfam00096) proteins and in proteins that contain the pfam01344 motif such as Kelch and a family of pox virus proteins. The BTB/POZ domain mediates homomeric dimerization and in some instances heteromeric dimerization. The structure of the dimer…	GO:0016567|protein ubiquitination;	GO:0031463|Cul3-RING ubiquitin ligase complex;	.	K10474	KBTBD6_7; kelch repeat and BTB domain-containing protein 6/7
ENSSSCG00000031375	0.0	0.0	0.0	0.07597202555097059	0.0	0.0	ENSSSCG00000031375	protein_coding	chr9:1899763-1900695:-	gi|927172505|ref|XP_013834548.1|	1330	0.0	PREDICTED: LOW QUALITY PROTEIN: olfactory receptor 481-like [Sus scrofa]	gi|927172504|ref|XM_013979094.1|	921	0.0	PREDICTED: Sus scrofa olfactory receptor 481-like (LOC100621852), mRNA	Q8VGI5	427	7e-149	Olfactory receptor 481	.	.	.	.	pfam13853	7tm_4	Olfactory receptor. The members of this family are transmembrane olfactory receptors.	GO:0007186|G-protein coupled receptor signaling pathway;GO:0007608|sensory perception of smell;	GO:0016021|integral component of membrane;GO:0005886|plasma membrane;	GO:0004930|G-protein coupled receptor activity;GO:0005549|odorant binding;GO:0004984|olfactory receptor activity;	K04257	OLFR; olfactory receptor
ENSSSCG00000031370	0.39889903753947376	0.6660598839556178	0.4470455854219918	0.21446868332543284	0.6678293099203501	0.1842082114196724	RPS14	protein_coding	chr2:151430039-151433856:-	gi|440901667|gb|ELR52566.1|	745	2e-97	40S ribosomal protein S14, partial [Bos mutus]	gi|288576815|dbj|AK347408.1|	644	0.0	Sus scrofa mRNA, clone:OVR010028A11, expressed in ovary	P62264	289	3e-98	40S ribosomal protein S14	YCR031c	213	3e-69	COG0100	pfam00411	Ribosomal_S11	Ribosomal protein S11.	GO:0030218|erythrocyte differentiation;GO:0030490|maturation of SSU-rRNA;GO:0000462|maturation of SSU-rRNA from tricistronic rRNA transcript (SSU-rRNA, 5.8S rRNA, LSU-rRNA);GO:0000122|negative regulation of transcription from RNA polymerase II promoter;GO:0000028|ribosomal small subunit assembly;GO:0006412|translation;	GO:0005737|cytoplasm;GO:0022627|cytosolic small ribosomal subunit;GO:0070062|extracellular exosome;GO:0031012|extracellular matrix;GO:0005925|focal adhesion;GO:0016020|membrane;GO:0005739|mitochondrion;GO:0005730|nucleolus;	GO:0048027|mRNA 5'-UTR binding;GO:0044822|poly(A) RNA binding;GO:0003723|RNA binding;GO:0070181|small ribosomal subunit rRNA binding;GO:0003735|structural constituent of ribosome;GO:0045182|translation regulator activity;	K02955	RP-S14e, RPS14; small subunit ribosomal protein S14e
ENSSSCG00000007866	0.52192538743425	0.6675185730545772	0.3086391876981817	0.22687939638511717	0.3612051384084989	0.16409922877143324	TMC7	protein_coding	chr3:26305453-26360878:+	gi|926724424|ref|XP_005697589.2|	3411	0.0	PREDICTED: transmembrane channel-like protein 7 [Capra hircus]	gi|927108366|ref|XM_005662111.2|	2318	0.0	PREDICTED: Sus scrofa transmembrane channel-like 7 (TMC7), transcript variant X1, mRNA	Q4R7U0	1232	0.0	Transmembrane channel-like protein 7	.	.	.	.	pfam07810	TMC	TMC domain. These sequences are similar to a region conserved amongst various protein products of the transmembrane channel-like (TMC) gene family, such as Transmembrane channel-like protein 3 and EVIN2 - this region is termed the TMC domain. Mutations in these genes are implicated in a number of human conditions, such as deafness and epidermodysplasia verruciformis. TMC proteins are thought to h…	GO:0006811|ion transport;	GO:0016021|integral component of membrane;	.	.	.
ENSSSCG00000036737	0.0	0.0	0.0	0.10938564789977709	0.0	0.0	ENSSSCG00000036737	protein_coding	chr13:162713660-162821918:-	gi|724908578|ref|XP_010378745.1|	817	2e-107	PREDICTED: ephrin type-A receptor 6-like, partial [Rhinopithecus roxellana]	gi|466023240|ref|XM_004272630.1|	420	0.0	PREDICTED: Orcinus orca EPH receptor A6 (EPHA6), mRNA	Q9UF33	320	1e-100	Ephrin type-A receptor 6	.	.	.	.	pfam07714	Pkinase_Tyr	Protein tyrosine kinase.	GO:0048013|ephrin receptor signaling pathway;	GO:0005887|integral component of plasma membrane;GO:0005654|nucleoplasm;GO:0005886|plasma membrane;	GO:0005524|ATP binding;GO:0005003|ephrin receptor activity;	K05107	EPHA6, EHK2; Eph receptor A6 [EC:2.7.10.1]
ENSSSCG00000013043	250.12058020388338	285.6884114949296	364.6964603290954	234.95370860356996	153.12049177793065	155.44695116103284	MACROD1	protein_coding	chr2:7939151-8087694:+	gi|325652136|ref|NP_001191699.1|	1407	0.0	O-acetyl-ADP-ribose deacetylase MACROD1 [Sus scrofa]	gi|325652135|ref|NM_001204770.1|	1138	0.0	Sus scrofa MACRO domain containing 1 (MACROD1), mRNA	Q2KHU5	491	3e-173	O-acetyl-ADP-ribose deacetylase MACROD1	MA1614	147	8e-41	COG2110	pfam01661	Macro	Macro domain. This domain is an ADP-ribose binding module. It is found in a number of otherwise unrelated proteins. It is found at the C-terminus of the macro-H2A histone protein. This domain is found in the non-structural proteins of several types of ssRNA viruses such as NSP3 from alphaviruses. This domain is also found on its own in a family of proteins from bacteria, archaebacteria, and eukar…	GO:0006974|cellular response to DNA damage stimulus;GO:0051725|protein de-ADP-ribosylation;GO:0042278|purine nucleoside metabolic process;	GO:0005739|mitochondrion;GO:0005634|nucleus;	GO:0019213|deacetylase activity;GO:0016798|hydrolase activity, acting on glycosyl bonds;	.	.
ENSSSCG00000023445	1.2914632567548594	2.2350232286466394	1.4932566863195822	0.9673114286913406	1.6359865149615198	1.3408421377509636	AVL9	protein_coding	chr18:40656660-40739172:-	gi|927217137|ref|XP_005673332.2|	3346	0.0	PREDICTED: late secretory pathway protein AVL9 homolog isoform X2 [Sus scrofa]	gi|927217134|ref|XM_003360177.4|	2425	0.0	PREDICTED: Sus scrofa AVL9 homolog (S. cerevisiase) (AVL9), transcript variant X1, mRNA	Q80U56	1142	0.0	Late secretory pathway protein AVL9 homolog	.	.	.	.	pfam09794	Avl9	Transport protein Avl9. Avl9 is a protein involved in exocytic transport from the Golgi. It has been speculated that Avl9 could play a role in deforming membranes for vesicle fission and/or in recruiting cargo.	GO:0016477|cell migration;	GO:0016021|integral component of membrane;GO:0055037|recycling endosome;	.	.	.
ENSSSCG00000014349	1.0040104333790454	1.197458522106972	0.8894383301181047	0.6040705879303012	1.0062503639281677	0.9272871016197544	TMEM173	protein_coding	chr2:141356326-141367312:-	gi|545812458|ref|XP_005661760.1|	2084	0.0	PREDICTED: stimulator of interferon genes protein isoform X3 [Sus scrofa]	gi|927106264|ref|XM_005661703.2|	1617	0.0	PREDICTED: Sus scrofa transmembrane protein 173 (TMEM173), transcript variant X3, mRNA	B8XX90	667	0.0	Stimulator of interferon genes protein	.	.	.	.	pfam15009	TMEM173	Transmembrane protein 173. Transmembrane protein 173, also known as stimulator of interferon genes protein (STING), is a transmembrane adaptor protein which is involved in innate immune signalling processes. It induces expression of type I interferons (IFN-alpha and IFN-beta) via the NF-kappa-B and IRF3, pathways in response to non-self cytosolic RNA and dsDNA.	GO:0002218|activation of innate immune response;GO:0006915|apoptotic process;GO:0051607|defense response to virus;GO:0045087|innate immune response;GO:0032608|interferon-beta production;GO:0032481|positive regulation of type I interferon production;	GO:0005789|endoplasmic reticulum membrane;GO:0016021|integral component of membrane;GO:0005741|mitochondrial outer membrane;GO:0048471|perinuclear region of cytoplasm;GO:0005886|plasma membrane;	GO:0035438|cyclic-di-GMP binding;GO:0061507|cyclic-GMP-AMP binding;GO:0042803|protein homodimerization activity;	K12654	TMEM173, MITA; transmembrane protein 173
ENSSSCG00000014348	10.452760977251161	9.346799431862033	10.450957095611207	8.003269720308474	10.314028257118924	8.94637115461495	SPATA24	protein_coding	chr2:141286568-141293207:-	gi|295444966|ref|NP_001171393.1|	1050	4e-139	spermatogenesis-associated protein 24 [Sus scrofa]	gi|115553557|dbj|AK236760.1|	1357	0.0	Sus scrofa mRNA, clone:PBL010001D11, expressed in periphral blood mononuclear cell	Q4R7I4	392	5e-134	Spermatogenesis-associated protein 24	.	.	.	.	pfam15175	SPATA24	Spermatogenesis-associated protein 24. This family of proteins bind to DNA and to TBP (TATA box binding protein), TATA-binding protein (TBP)-related protein 2 (TRF2) and several polycomb factors. It is likely to function as a transcription regulator.	GO:0030154|cell differentiation;GO:0007275|multicellular organismal development;GO:0006355|regulation of transcription, DNA-templated;GO:0007283|spermatogenesis;GO:0006351|transcription, DNA-templated;	GO:0005737|cytoplasm;GO:0005730|nucleolus;GO:0005654|nucleoplasm;	GO:0003677|DNA binding;	.	.
ENSSSCG00000014343	20.799345243813118	19.399429122664507	17.47258802823889	17.54551268439979	22.564171530583174	20.107347093760133	ENSSSCG00000014343	protein_coding	chr2:141179564-141231658:+	gi|593751604|ref|XP_007114754.1|	3827	0.0	PREDICTED: matrin-3-like isoform X1 [Physeter catodon]	gi|927106296|ref|XM_013995180.1|	3773	0.0	PREDICTED: Sus scrofa matrin 3 (MATR3), transcript variant X8, mRNA	P43243	926	0.0	Matrin-3	.	.	.	.	pfam13893	RRM_5	RNA recognition motif. (a.k.a. RRM, RBD, or RNP domain). The RRM motif is probably diagnostic of an RNA binding protein. RRMs are found in a variety of RNA binding proteins, including various hnRNP proteins, proteins implicated in regulation of alternative splicing, and protein components of snRNPs. The motif also appears in a few single stranded DNA binding proteins.	GO:0010608|posttranscriptional regulation of gene expression;	GO:0016020|membrane;GO:0005637|nuclear inner membrane;GO:0016363|nuclear matrix;GO:0005654|nucleoplasm;	GO:0000166|nucleotide binding;GO:0044822|poly(A) RNA binding;GO:0005198|structural molecule activity;GO:0008270|zinc ion binding;	K13213	MATR3; matrin 3
ENSSSCG00000014347	16.26409797216193	15.374353702353323	15.74053350003976	23.58097190724136	17.558485906931065	18.80142781409171	PROB1	protein_coding	chr2:141282086-141285145:-	gi|927106314|ref|XP_013850642.1|	3091	0.0	PREDICTED: proline-rich basic protein 1 [Sus scrofa]	gi|927106313|ref|XM_013995188.1|	3060	0.0	PREDICTED: Sus scrofa proline-rich basic protein 1 (PROB1), mRNA	E7EW31	760	0.0	Proline-rich basic protein 1	.	.	.	.	pfam15232	DUF4585	Domain of unknown function (DUF4585). The function of this protein domain family is yet to be characterized. It is putatively thought to lie in the C-terminal domain of the DNA nucleotide repair protein, Xeroderma pigmentosa complementation group A (XPA). The function of XPA is to bind to DNA and repair any mismatched base pairs. This domain family is often found in eukaryotes, and is approximate…	GO:0010608|posttranscriptional regulation of gene expression;	GO:0016020|membrane;GO:0005637|nuclear inner membrane;GO:0016363|nuclear matrix;GO:0005654|nucleoplasm;	GO:0000166|nucleotide binding;GO:0044822|poly(A) RNA binding;GO:0005198|structural molecule activity;GO:0008270|zinc ion binding;	.	.
ENSSSCG00000040147	0.5447774045735375	0.34652938472622064	0.48842501151063905	0.8298845022478957	0.7383311644603476	0.4192893517507006	SHISA3	protein_coding	chr8:33373593-33377659:+	gi|634865851|ref|XP_007945357.1|	988	5e-129	PREDICTED: protein shisa-3 homolog [Orycteropus afer afer]	gi|759127671|ref|XM_011362796.1|	838	0.0	PREDICTED: Pteropus vampyrus shisa family member 3 (SHISA3), mRNA	A0PJX4	374	2e-126	Protein shisa-3 homolog	.	.	.	.	pfam13908	Shisa	Wnt and FGF inhibitory regulator. Shisa is a transcription factor-type molecule that physically interacts with immature forms of the Wnt receptor Frizzled and the FGF receptor within the endoplasmic reticulum to inhibit their post-translational maturation and trafficking to the cell surface.	GO:0007275|multicellular organismal development;	GO:0005789|endoplasmic reticulum membrane;GO:0016021|integral component of membrane;	.	.	.
ENSSSCG00000000555	2.651954376090905	2.2643268084800243	1.7801766563538164	2.1058373379046835	2.4394793568408555	2.537223932863369	ITPR2	protein_coding	chr5:46935923-47464125:+	gi|426225329|ref|XP_004006819.1|	13557	0.0	PREDICTED: inositol 1,4,5-trisphosphate receptor type 2 isoform X2 [Ovis aries]	gi|602681693|ref|XM_007446283.1|	7766	0.0	PREDICTED: Lipotes vexillifer inositol 1,4,5-trisphosphate receptor, type 2 (ITPR2), mRNA	Q8WN96	285	1e-75	Inositol 1,4,5-trisphosphate receptor type 2	.	.	.	.	pfam08709	Ins145_P3_rec	Inositol 1,4,5-trisphosphate/ryanodine receptor. This domain corresponds to the ligand binding region on inositol 1,4,5-trisphosphate receptor, and the N terminal region of the ryanodine receptor. Both receptors are involved in Ca2+ release. They can couple to the activation of neurotransmitter-gated receptors and voltage-gated Ca2+ channels on the plasma membrane, thus allowing the endoplasmic r…	GO:0051209|release of sequestered calcium ion into cytosol;	GO:0005789|endoplasmic reticulum membrane;GO:0016021|integral component of membrane;GO:0005886|plasma membrane;GO:0005791|rough endoplasmic reticulum;GO:0016529|sarcoplasmic reticulum;GO:0030667|secretory granule membrane;GO:0030658|transport vesicle membrane;	GO:0005509|calcium ion binding;GO:0070679|inositol 1,4,5 trisphosphate binding;GO:0005220|inositol 1,4,5-trisphosphate-sensitive calcium-release channel activity;GO:0035091|phosphatidylinositol binding;	K04959	ITPR2; inositol 1,4,5-triphosphate receptor type 2
ENSSSCG00000000554	7.916321945602226	9.568379958845552	6.884274366569114	3.368882996806375	4.843731106555158	3.91404341266351	FGFR1OP2	protein_coding	chr5:46793137-46824696:-	gi|194037781|ref|XP_001924632.1|	1307	4e-170	PREDICTED: FGFR1 oncogene partner 2 isoform X1 [Sus scrofa]	gi|927131256|ref|XM_001924597.4|	2980	0.0	PREDICTED: Sus scrofa FGFR1 oncogene partner 2 (FGFR1OP2), transcript variant X1, mRNA	Q5R561	421	3e-136	FGFR1 oncogene partner 2 homolog	.	.	.	.	pfam05769	DUF837	Protein of unknown function (DUF837). This family consists of several eukaryotic proteins of unknown function. One of the family members is a circulating cathodic antigen (CCA) found in Schistosoma mansoni (Blood fluke).	.	GO:0005737|cytoplasm;	.	.	.
ENSSSCG00000000551	0.09172272628023845	0.37923751542742	0.08223482336658718	0.32876576919784584	0.1754976837492783	0.028237854301577797	ARNTL2	protein_coding	chr5:46330522-46482280:-	gi|927131239|ref|XP_013853238.1|	2536	0.0	PREDICTED: aryl hydrocarbon receptor nuclear translocator-like protein 2 isoform X3 [Sus scrofa]	gi|927131238|ref|XM_013997784.1|	1585	0.0	PREDICTED: Sus scrofa aryl hydrocarbon receptor nuclear translocator-like protein 2 (LOC100625791), transcript variant X3, mRNA	Q8WYA1	806	0.0	Aryl hydrocarbon receptor nuclear translocator-like protein 2	.	.	.	.	pfam14598	PAS_11	PAS domain. This family includes the PAS-B domain of NCOA1 (Nuclear receptor coactivator 1), which binds to an LXXLL motif in the C-terminal region of STAT6 (Signal transducer and activator of transcription 6).	GO:0007623|circadian rhythm;GO:0009649|entrainment of circadian clock;GO:0042753|positive regulation of circadian rhythm;GO:0045944|positive regulation of transcription from RNA polymerase II promoter;GO:0045893|positive regulation of transcription, DNA-templated;GO:0006357|regulation of transcription from RNA polymerase II promoter;GO:0006355|regulation of transcription, DNA-templated;GO:0006351…	GO:0005737|cytoplasm;GO:0005730|nucleolus;GO:0005634|nucleus;GO:0005667|transcription factor complex;	GO:0070888|E-box binding;GO:0000982|transcription factor activity, RNA polymerase II core promoter proximal region sequence-specific binding;GO:0003700|transcription factor activity, sequence-specific DNA binding;	K09099	ARNTL2, BMAL2; aryl hydrocarbon receptor nuclear translocator-like protein 2
ENSSSCG00000000553	3.774196988795432	3.2213596707559913	2.2517582822985798	1.2544162994627779	1.7593858986016204	1.1661534200346781	TM7SF3	protein_coding	chr5:46740931-46784194:+	gi|350584312|ref|XP_001925060.3|	2717	0.0	PREDICTED: transmembrane 7 superfamily member 3 isoform X2 [Sus scrofa]	gi|927131253|ref|XM_001925025.6|	3311	0.0	PREDICTED: Sus scrofa transmembrane 7 superfamily member 3 (TM7SF3), transcript variant X2, mRNA	Q9NS93	828	0.0	Transmembrane 7 superfamily member 3	.	.	.	.	pfam13886	DUF4203	Domain of unknown function (DUF4203). This is the N-terminal region of 7tm proteins. The function is not known.	.	GO:0070062|extracellular exosome;GO:0016021|integral component of membrane;GO:0005886|plasma membrane;	.	.	.
ENSSSCG00000016285	0.0	0.0	0.0	0.0	0.0	0.05230310470292245	ECEL1	protein_coding	chr15:132989038-132996310:-	gi|927211747|ref|XP_013840033.1|	3841	0.0	PREDICTED: endothelin-converting enzyme-like 1 isoform X1 [Sus scrofa]	gi|927211746|ref|XM_013984579.1|	2328	0.0	PREDICTED: Sus scrofa endothelin-converting enzyme-like 1 (LOC100521587), transcript variant X1, mRNA	O95672	1432	0.0	Endothelin-converting enzyme-like 1	MA2001	333	1e-101	COG3590	pfam05649	Peptidase_M13_N	Peptidase family M13. M13 peptidases are well-studied proteases found in a wide range of organisms including mammals and bacteria. In mammals they participate in processes such as cardiovascular development, blood-pressure regulation, nervous control of respiration, and regulation of the function of neuropeptides in the central nervous system. In bacteria they may be used for digestion of milk.	GO:0007218|neuropeptide signaling pathway;GO:0003016|respiratory system process;	GO:0005887|integral component of plasma membrane;	GO:0046872|metal ion binding;GO:0004222|metalloendopeptidase activity;GO:0008237|metallopeptidase activity;	K09610	ECEL1; endothelin-converting enzyme-like 1 [EC:3.4.24.-]
ENSSSCG00000016288	0.11891412980168017	0.9455063639177548	0.17768919540826014	0.4262291030610677	0.3033658097121219	0.21965416911918845	CHRNG	protein_coding	chr15:133047452-133058400:+	gi|311273245|ref|XP_003133779.1|	2516	0.0	PREDICTED: acetylcholine receptor subunit gamma isoform X2 [Sus scrofa]	gi|927211763|ref|XM_003133731.2|	1505	0.0	PREDICTED: Sus scrofa cholinergic receptor, nicotinic, gamma (muscle) (CHRNG), transcript variant X2, mRNA	P13536	916	0.0	Acetylcholine receptor subunit gamma	.	.	.	.	pfam02931	Neur_chan_LBD	Neurotransmitter-gated ion-channel ligand binding domain. This family is the extracellular ligand binding domain of these ion channels. This domain forms a pentameric arrangement in the known structure.	GO:0098655|cation transmembrane transport;GO:0007274|neuromuscular synaptic transmission;GO:0035094|response to nicotine;GO:0007165|signal transduction;GO:0007271|synaptic transmission, cholinergic;	GO:0005892|acetylcholine-gated channel complex;GO:0030054|cell junction;GO:0045211|postsynaptic membrane;	GO:0004889|acetylcholine-activated cation-selective channel activity;	K04818	CHRNG; nicotinic acetylcholine receptor gamma
ENSSSCG00000000559	4.858151666104818	4.504521569688554	4.8210379033640764	4.665777359391027	8.124056373048687	6.576575287748092	RASSF8	protein_coding	chr5:47728988-47848475:-	gi|440900368|gb|ELR51519.1|	1890	0.0	Ras association domain-containing protein 8, partial [Bos mutus]	gi|927131360|ref|XM_005653134.2|	5375	0.0	PREDICTED: Sus scrofa Ras association (RalGDS/AF-6) domain family (N-terminal) member 8 (RASSF8), transcript variant X5, mRNA	Q8NHQ8	721	0.0	Ras association domain-containing protein 8	.	.	.	.	pfam00788	RA	Ras association (RalGDS/AF-6) domain. RasGTP effectors (in cases of AF6, canoe and RalGDS); putative RasGTP effectors in other cases. Recent evidence (not yet in MEDLINE) shows that some RA domains do NOT bind RasGTP. Predicted structure similar to that determined, and that of the RasGTP-binding domain of Raf kinase.	GO:0034334|adherens junction maintenance;GO:0007165|signal transduction;	.	.	K09855	RASSF7_8; Ras association domain-containing protein 7/8
ENSSSCG00000019885	1.5329782779860008	0.0	0.6872026324742712	0.8242081376634367	0.7332810196965969	0.7079164403976945	SNORD127	snoRNA	chr1:175312934-175313019:+	.	.	.	.	gi|850493841|gb|CP011907.1|	68	3e-26	Ovis canadensis canadensis isolate 43U chromosome 22 sequence	.	.	.	.	.	.	.	.	pfam14018	DUF4234	Domain of unknown function (DUF4234). This presumed integral membrane protein domain is functionally uncharacterized. This domain family is found in bacteria and archaea, and is approximately 70 amino acids in length.	.	.	.	.	.
ENSSSCG00000024549	0.8853464291665182	3.071798941529136	0.721604717860651	1.2982032937555963	0.9239878050389354	1.115033221139226	LYL1	protein_coding	chr2:65952519-65954294:+	gi|311248932|ref|XP_003123383.1|	1131	2e-153	PREDICTED: protein lyl-1 [Sus scrofa]	gi|927103699|ref|XM_005652880.2|	766	0.0	PREDICTED: Sus scrofa lymphoblastic leukemia associated hematopoiesis regulator 1 (LYL1), transcript variant X3, mRNA	P12980	381	9e-132	Protein lyl-1	.	.	.	.	pfam00010	HLH	Helix-loop-helix DNA-binding domain.	GO:0030183|B cell differentiation;GO:0001955|blood vessel maturation;GO:0060216|definitive hemopoiesis;GO:0045893|positive regulation of transcription, DNA-templated;GO:0006355|regulation of transcription, DNA-templated;GO:0006351|transcription, DNA-templated;	GO:0005634|nucleus;	GO:0003677|DNA binding;GO:0000977|RNA polymerase II regulatory region sequence-specific DNA binding;GO:0000981|RNA polymerase II transcription factor activity, sequence-specific DNA binding;	K15604	LYL1; protein lyl-1
ENSSSCG00000002898	0.2555725790021397	0.4877041952051999	0.1233808484191802	0.06341953460100408	0.20688453463554451	0.14525693736761522	ENSSSCG00000002898	protein_coding	chr6:45175647-45183952:+	gi|343403753|ref|NP_001230306.1|	1008	1e-124	protein lin-37 homolog [Sus scrofa]	gi|927139008|ref|XM_003127059.3|	1105	0.0	PREDICTED: Sus scrofa heat shock protein, alpha-crystallin-related, B6 (HSPB6), mRNA	Q96GY3	380	2e-121	Protein lin-37 homolog	.	.	.	.	pfam15306	LIN37	LIN37. LIN37 is a component of the DREAM (or LINC) complex which represses cell cycle-dependent genes in quiescent cells and plays a role in the cell cycle-dependent activation of G2/M genes.	GO:0007049|cell cycle;GO:0051726|regulation of cell cycle;	GO:0005654|nucleoplasm;GO:0017053|transcriptional repressor complex;	.	.	.
ENSSSCG00000002895	2.4855643364103335	2.253534806149104	2.3494568076300024	1.6326661795380482	3.0772530217467153	1.9320647296709643	ENSSSCG00000002895	protein_coding	chr6:45146846-45160350:+	gi|335289510|ref|XP_003127115.2|	6623	0.0	PREDICTED: histone-lysine N-methyltransferase 2B [Sus scrofa]	gi|927138948|ref|XM_003127067.4|	5673	0.0	PREDICTED: Sus scrofa lysine (K)-specific methyltransferase 2B (KMT2B), mRNA	Q9UMN6	212	1e-53	Histone-lysine N-methyltransferase 2B	.	.	.	.	pfam13771	zf-HC5HC2H	PHD-like zinc-binding domain. The members of this family are annotated as containing PHD domain, but the zinc-binding region here is not typical of PHD domains. The conformation here is a well-conserved cysteine-histidine rich region spanning 90 residues, where the Cys and His are arranged as HxxC(31)CxxC(6)CxxCxxxxCxxxxHxxC (21)CxxH.	GO:0048096|chromatin-mediated maintenance of transcription;GO:0016458|gene silencing;GO:0051568|histone H3-K4 methylation;GO:0080182|histone H3-K4 trimethylation;GO:0007613|memory;GO:0009994|oocyte differentiation;GO:0001541|ovarian follicle development;GO:0030728|ovulation;GO:0051569|regulation of histone H3-K4 methylation;GO:0006351|transcription, DNA-templated;	GO:0035097|histone methyltransferase complex;GO:0005654|nucleoplasm;GO:0005634|nucleus;	GO:0003677|DNA binding;GO:0042800|histone methyltransferase activity (H3-K4 specific);GO:0018024|histone-lysine N-methyltransferase activity;GO:0003700|transcription factor activity, sequence-specific DNA binding;GO:0008270|zinc ion binding;	K14959	MLL4; histone-lysine N-methyltransferase MLL4 [EC:2.1.1.43]
ENSSSCG00000002893	0.1351787333123375	0.39866383913972925	0.09916011139729417	0.06607186785892577	0.05878278122101728	0.14754857948632036	CD22	protein_coding	chr6:44814965-44879703:+	gi|927138800|ref|XP_013853768.1|	4457	0.0	PREDICTED: B-cell receptor CD22 [Sus scrofa]	gi|927138799|ref|XM_013998314.1|	3365	0.0	PREDICTED: Sus scrofa CD22 molecule (CD22), mRNA	P20273	855	0.0	B-cell receptor CD22	.	.	.	.	pfam13895	Ig_2	Immunoglobulin domain. This domain contains immunoglobulin-like domains.	GO:0007155|cell adhesion;	GO:0070062|extracellular exosome;GO:0016021|integral component of membrane;GO:0005886|plasma membrane;	GO:0030246|carbohydrate binding;	K06467	CD22, SIGLEC2; CD22 antigen
ENSSSCG00000013106	0.1219199740198484	0.15510501437190888	0.018218072254250095	0.08740061632435951	0.019439632458047883	0.0	PTGDR2	protein_coding	chr2:10880901-10897184:+	gi|311247591|ref|XP_003122717.1|	1425	0.0	PREDICTED: prostaglandin D2 receptor 2 [Sus scrofa]	gi|927101722|ref|XM_003122669.3|	3034	0.0	PREDICTED: Sus scrofa prostaglandin D2 receptor 2 (PTGDR2), transcript variant X1, mRNA	Q9Y5Y4	481	6e-166	Prostaglandin D2 receptor 2	.	.	.	.	pfam00001	7tm_1	7 transmembrane receptor (rhodopsin family). This family contains, amongst other G-protein-coupled receptors (GCPRs), members of the opsin family, which have been considered to be typical members of the rhodopsin superfamily. They share several motifs, mainly the seven transmembrane helices, GCPRs of the rhodopsin superfamily. All opsins bind a chromophore, such as 11-cis-retinal. The function of…	GO:0007193|adenylate cyclase-inhibiting G-protein coupled receptor signaling pathway;GO:0019722|calcium-mediated signaling;GO:0007268|synaptic transmission;GO:0006935|chemotaxis;GO:0007186|G-protein coupled receptor signaling pathway;GO:0007187|G-protein coupled receptor signaling pathway, coupled to cyclic nucleotide second messenger;GO:0006955|immune response;GO:2000255|negative regulation of m…	GO:0005887|integral component of plasma membrane;GO:0005622|intracellular;GO:0043005|neuron projection;GO:0005886|plasma membrane;	GO:0004930|G-protein coupled receptor activity;GO:0042923|neuropeptide binding;GO:0004956|prostaglandin D receptor activity;GO:0004958|prostaglandin F receptor activity;GO:0001785|prostaglandin J receptor activity;	K06715	GPR44; G protein-coupled receptor 44
ENSSSCG00000013107	8.491009668352094	12.220037691134127	8.756326271644406	5.888351726270252	7.617752078740176	5.86673988271725	PRPF19	protein_coding	chr2:10851066-10863143:+	gi|190360605|ref|NP_001121929.1|	2631	0.0	pre-mRNA-processing factor 19 [Sus scrofa]	gi|744585228|ref|XM_010986992.1|	1616	0.0	PREDICTED: Camelus dromedarius pre-mRNA processing factor 19 (PRPF19), mRNA	Q08E38	1016	0.0	Pre-mRNA-processing factor 19	.	.	.	.	pfam08606	Prp19	Prp19/Pso4-like. This regions is found specifically in PRP19-like protein. The region represented by this family covers the sequence implicated in self-interaction and a coiled-coiled motif. PRP19-like proteins form an oligomer that is necessary for spliceosome assembly.	GO:0034613|cellular protein localization;GO:0006303|double-strand break repair via nonhomologous end joining;GO:0001833|inner cell mass cell proliferation;GO:0008610|lipid biosynthetic process;GO:0000398|mRNA splicing, via spliceosome;GO:0045665|negative regulation of neuron differentiation;GO:0048711|positive regulation of astrocyte differentiation;GO:0048026|positive regulation of mRNA splicing…	GO:0071013|catalytic step 2 spliceosome;GO:0005737|cytoplasm;GO:0005662|DNA replication factor A complex;GO:0005811|lipid particle;GO:0016020|membrane;GO:0016607|nuclear speck;GO:0005634|nucleus;GO:0000974|Prp19 complex;GO:0035861|site of double-strand break;GO:0005819|spindle;	GO:0016874|ligase activity;GO:0061630|ubiquitin protein ligase activity;GO:0034450|ubiquitin-ubiquitin ligase activity;	K10599	PRPF19, PRP19; pre-mRNA-processing factor 19 [EC:2.3.2.27]
ENSSSCG00000013105	2.1433912703397016	2.24625297599318	2.016185122141998	2.021418785388845	2.790063922491636	1.411681984822908	CCDC86	protein_coding	chr2:10895263-10906208:-	gi|311247589|ref|XP_003122716.1|	1433	0.0	PREDICTED: coiled-coil domain-containing protein 86 [Sus scrofa]	gi|927101724|ref|XM_003122668.3|	1965	0.0	PREDICTED: Sus scrofa coiled-coil domain containing 86 (CCDC86), mRNA	Q2TBX7	375	3e-117	Coiled-coil domain-containing protein 86	.	.	.	.	pfam03157	Glutenin_hmw	High molecular weight glutenin subunit. Members of this family include high molecular weight subunits of glutenin. This group of gluten proteins is thought to be largely responsible for the elastic properties of gluten, and hence, doughs. Indeed, glutenin high molecular weight subunits are classified as elastomeric proteins, because the glutenin network can withstand significant deformations with…	GO:0006364|rRNA processing;	GO:0005634|nucleus;GO:0030687|preribosome, large subunit precursor;	.	K14822	CGR1; rRNA-processing protein CGR1
ENSSSCG00000013102	0.3214768660058892	1.226936135516944	0.17842372111152696	0.08230596822927956	0.1610970377689226	0.2544948095066491	MS4A7	protein_coding	chr2:11294473-11320364:-	gi|343403815|ref|NP_001230287.1|	943	5e-114	membrane-spanning 4-domains subfamily A member 7 [Sus scrofa]	gi|343403814|ref|NM_001243358.1|	1128	0.0	Sus scrofa membrane-spanning 4-domains, subfamily A, member 7 (MS4A7), mRNA	Q9GZW8	217	1e-61	Membrane-spanning 4-domains subfamily A member 7	.	.	.	.	pfam04103	CD20	CD20-like family. This family includes the CD20 protein and the beta subunit of the high affinity receptor for IgE Fc. The high affinity receptor for IgE is a tetrameric structure consisting of a single IgE-binding alpha subunit, a single beta subunit, and two disulfide-linked gamma subunits. The alpha subunit of Fc epsilon RI and most Fc receptors are homologous members of the Ig superfamily. By…	.	GO:0016021|integral component of membrane;	.	.	.
ENSSSCG00000013100	1.8453428284338138	2.0782221200561044	0.732301290777998	1.0084161978020754	0.7235218872637372	1.7881468967181784	ENSSSCG00000013100	protein_coding	chr2:11373443-11383698:+	gi|311247575|ref|XP_003122711.1|	1133	6e-153	PREDICTED: membrane-spanning 4-domains subfamily A member 6A isoform X1 [Sus scrofa]	gi|927101780|ref|XM_003122663.3|	1024	0.0	PREDICTED: Sus scrofa membrane-spanning 4-domains subfamily A member 6A (LOC100524972), transcript variant X1, mRNA	Q9H2W1	239	1e-75	Membrane-spanning 4-domains subfamily A member 6A	.	.	.	.	pfam04103	CD20	CD20-like family. This family includes the CD20 protein and the beta subunit of the high affinity receptor for IgE Fc. The high affinity receptor for IgE is a tetrameric structure consisting of a single IgE-binding alpha subunit, a single beta subunit, and two disulfide-linked gamma subunits. The alpha subunit of Fc epsilon RI and most Fc receptors are homologous members of the Ig superfamily. By…	.	GO:0016021|integral component of membrane;	.	.	.
ENSSSCG00000013101	2.660613864675868	3.5747617377420298	0.7302235551003375	1.4012896179055463	0.935023903204557	1.5546171582374413	ENSSSCG00000013101	protein_coding	chr2:11293374-11367868:+	gi|927101763|ref|XP_013849717.1|	1217	2e-164	PREDICTED: membrane-spanning 4-domains subfamily A member 4A isoform X1 [Sus scrofa]	gi|927101762|ref|XM_013994263.1|	1056	0.0	PREDICTED: Sus scrofa membrane-spanning 4-domains, subfamily A, member 4A (MS4A4A), transcript variant X1, mRNA	Q96JQ5	222	4e-68	Membrane-spanning 4-domains subfamily A member 4A	.	.	.	.	pfam04103	CD20	CD20-like family. This family includes the CD20 protein and the beta subunit of the high affinity receptor for IgE Fc. The high affinity receptor for IgE is a tetrameric structure consisting of a single IgE-binding alpha subunit, a single beta subunit, and two disulfide-linked gamma subunits. The alpha subunit of Fc epsilon RI and most Fc receptors are homologous members of the Ig superfamily. By…	.	GO:0016021|integral component of membrane;	.	.	.
ENSSSCG00000004076	7.155418311669973	5.985554398482942	7.909216915019864	4.3741246740829824	8.252001125745496	5.205422747608326	MTRF1L	protein_coding	chr1:13446492-13458290:+	gi|349732236|ref|NP_001231863.1|	2019	0.0	peptide chain release factor 1-like, mitochondrial [Sus scrofa]	gi|349732235|ref|NM_001244934.1|	1280	0.0	Sus scrofa mitochondrial translational release factor 1-like (MTRF1L), mRNA	Q2KI15	704	0.0	Peptide chain release factor 1-like, mitochondrial	BB0196	304	3e-98	COG0216	pfam00472	RF-1	RF-1 domain. This domain is found in peptide chain release factors such as RF-1 and RF-2, and a number of smaller proteins of unknown function. This domain contains the peptidyl-tRNA hydrolase activity. The domain contains a highly conserved motif GGQ, where the glutamine is thought to coordinate the water that mediates the hydrolysis.	GO:0070126|mitochondrial translational termination;	GO:0005739|mitochondrion;	GO:0043022|ribosome binding;GO:0016149|translation release factor activity, codon specific;	K02835	prfA, MTRF1, MRF1; peptide chain release factor 1
ENSSSCG00000004077	0.22414180076889595	0.19442065943681314	0.17355318415192567	0.1643320707242401	0.21443086387418261	0.16937475266393062	FBXO5	protein_coding	chr1:13466914-13482333:+	gi|311243770|ref|XP_003121186.1|	2225	0.0	PREDICTED: F-box only protein 5 isoform X1 [Sus scrofa]	gi|927093756|ref|XM_003121138.3|	2627	0.0	PREDICTED: Sus scrofa F-box protein 5 (FBXO5), transcript variant X1, mRNA	Q9UKT4	144	3e-34	F-box only protein 5	.	.	.	.	pfam01485	IBR	IBR domain. The IBR (In Between Ring fingers) domain is often found to occur between pairs of ring fingers (pfam00097). This domain has also been called the C6HC domain and DRIL (for double RING finger linked) domain. Proteins that contain two Ring fingers and an IBR domain (these proteins are also termed RBR family proteins) are thought to exist in all eukaryotic organisms. RBR family members pl…	GO:0051301|cell division;GO:0000082|G1/S transition of mitotic cell cycle;GO:0046785|microtubule polymerization;GO:0007067|mitotic nuclear division;GO:0045835|negative regulation of meiotic nuclear division;GO:0051436|negative regulation of ubiquitin-protein ligase activity involved in mitotic cell cycle;GO:0001556|oocyte maturation;GO:0051437|positive regulation of ubiquitin-protein ligase activ…	GO:0005737|cytoplasm;GO:0005829|cytosol;GO:0005654|nucleoplasm;GO:0005634|nucleus;GO:0005819|spindle;	GO:0046872|metal ion binding;GO:0019901|protein kinase binding;	K10292	FBXO5, EMI1; F-box protein 5
ENSSSCG00000004075	0.05841210983907669	0.05573334809730532	0.052369894898349416	0.04710804154124206	0.11176281381286192	0.09440976896752595	RGS17	protein_coding	chr1:13340248-13442039:+	gi|440909487|gb|ELR59391.1|	983	2e-119	Regulator of G-protein signaling 17, partial [Bos mutus]	gi|803267269|ref|XM_012137989.1|	2782	0.0	PREDICTED: Ovis aries musimon regulator of G-protein signaling 17 (RGS17), transcript variant X4, mRNA	Q9UGC6	368	1e-115	Regulator of G-protein signaling 17	.	.	.	.	pfam00615	RGS	Regulator of G protein signaling domain. RGS family members are GTPase-activating proteins for heterotrimeric G-protein alpha-subunits.	GO:0009968|negative regulation of signal transduction;	GO:0030054|cell junction;GO:0005737|cytoplasm;GO:0016020|membrane;GO:0043005|neuron projection;GO:0005634|nucleus;GO:0045202|synapse;	GO:0005096|GTPase activator activity;	K16449	RGS; regulator of G-protein signaling
ENSSSCG00000004072	0.16801546122361438	0.3206206456812695	0.10042383414237437	0.06022251473156802	0.10715746422074314	0.3103524921369672	IPCEF1	protein_coding	chr1:12528708-12597745:+	gi|927093741|ref|XP_003353226.2|	1635	0.0	PREDICTED: interactor protein for cytohesin exchange factors 1-like [Sus scrofa]	gi|371914248|dbj|AK389763.1|	905	0.0	Sus scrofa mRNA, clone: AMP010063B07, expressed in alveolar macrophage	Q8WWN9	494	4e-172	Interactor protein for cytohesin exchange factors 1	.	.	.	.	pfam00169	PH	PH domain. PH stands for pleckstrin homology.	GO:0015671|oxygen transport;GO:0006979|response to oxidative stress;	GO:0005737|cytoplasm;GO:0005886|plasma membrane;	GO:0005344|oxygen transporter activity;GO:0004601|peroxidase activity;	.	.
ENSSSCG00000004070	4.520320563292054	5.119367247612364	4.572540593001881	3.835737871433686	4.1458580728999905	3.9479955329871426	SCAF8	protein_coding	chr1:11929991-12146676:-	gi|545797571|ref|XP_005654417.1|	3237	0.0	PREDICTED: protein SCAF8 isoform X1 [Sus scrofa]	gi|927093733|ref|XR_001301736.1|	4569	0.0	PREDICTED: Sus scrofa SR-related CTD-associated factor 8 (SCAF8), transcript variant X2, misc_RNA	Q9UPN6	707	0.0	Protein SCAF8	.	.	.	.	pfam04818	CTD_bind	RNA polymerase II-binding domain. This domain binds to the phosphorylated C-terminal domain (CTD) of RNA polymerase II.	GO:0006397|mRNA processing;GO:0008380|RNA splicing;	GO:0016363|nuclear matrix;GO:0005654|nucleoplasm;GO:0005681|spliceosomal complex;	GO:0000166|nucleotide binding;GO:0003723|RNA binding;GO:0043175|RNA polymerase core enzyme binding;	K13191	RBM16, SCAF8; RNA-binding protein 16
ENSSSCG00000004071	2.8613521529466897	2.372917951110037	4.65123274653174	1.5240327348762452	1.1000702680884442	1.4571878371512788	CNKSR3	protein_coding	chr1:12297377-12395687:+	gi|744606341|ref|XP_010992327.1|	2485	0.0	PREDICTED: connector enhancer of kinase suppressor of ras 3 [Camelus dromedarius]	gi|927093730|ref|XM_013984690.1|	1618	0.0	PREDICTED: Sus scrofa CNKSR family member 3 (CNKSR3), mRNA	Q6P9H4	951	0.0	Connector enhancer of kinase suppressor of ras 3	.	.	.	.	pfam06663	DUF1170	Protein of unknown function (DUF1170). This family represents a conserved region of unknown function within MAGUIN, a neuronal membrane-associated guanylate kinase-interacting protein. This region is situated between the pfam00595 and pfam00169 domains. All family members also contain an N-terminal pfam00536 domain.	GO:0070373|negative regulation of ERK1 and ERK2 cascade;GO:0033137|negative regulation of peptidyl-serine phosphorylation;GO:0010765|positive regulation of sodium ion transport;	GO:0005737|cytoplasm;GO:0016020|membrane;	.	.	.
ENSSSCG00000029050	7.551260924580638	6.526848269866977	7.785672412257359	5.851100222563548	7.415329017915655	5.763985410596592	MRPL55	protein_coding	chr2:51239024-51247521:-	gi|927103003|ref|XP_013850034.1|	517	2e-74	PREDICTED: multiple myeloma tumor-associated protein 2 isoform X2 [Sus scrofa]	gi|229890972|emb|FP085478.6|	1544	0.0	Pig DNA sequence from clone CH242-132B19 on chromosome 2, complete sequence	Q58DU0	229	7e-67	Multiple myeloma tumor-associated protein 2 homolog	.	.	.	.	pfam09776	Mitoc_L55	Mitochondrial ribosomal protein L55. Members of this family are involved in mitochondrial biogenesis and G2/M phase cell cycle progression. They form a component of the mitochondrial ribosome large subunit (39S) which comprises a 16S rRNA and about 50 distinct proteins.	.	.	GO:0044822|poly(A) RNA binding;	.	.
ENSSSCG00000026943	0.2939917620570399	0.4146660525781477	0.25212088048115594	0.05497917381350053	0.22011227816372544	0.059027354929418005	MRAP2	protein_coding	chr1:53256257-53318106:+	gi|927094681|ref|XP_013848111.1|	1048	3e-136	PREDICTED: melanocortin-2 receptor accessory protein 2 isoform X1 [Sus scrofa]	gi|350578242|ref|XM_003353248.2|	1924	0.0	PREDICTED: Sus scrofa melanocortin 2 receptor accessory protein 2 (MRAP2), transcript variant X2, mRNA	Q96G30	374	2e-124	Melanocortin-2 receptor accessory protein 2	.	.	.	.	pfam15183	MRAP	Melanocortin-2 receptor accessory protein family. This family is thought to be involved in cell trafficking. It is required for MC2R expression in certain cell types, suggesting that it is involved in the processing, trafficking or function of MC2R. MRAP may be involved in the intracellular trafficking pathways in adipocyte cells. This family of proteins is found in eukaryotes. Proteins in this f…	GO:0097009|energy homeostasis;GO:0006112|energy reserve metabolic process;GO:0007631|feeding behavior;GO:0030819|positive regulation of cAMP biosynthetic process;GO:0034394|protein localization to cell surface;	GO:0005783|endoplasmic reticulum;GO:0005789|endoplasmic reticulum membrane;GO:0016021|integral component of membrane;GO:0005886|plasma membrane;	GO:0031780|corticotropin hormone receptor binding;GO:0070996|type 1 melanocortin receptor binding;GO:0031781|type 3 melanocortin receptor binding;GO:0031782|type 4 melanocortin receptor binding;GO:0031783|type 5 melanocortin receptor binding;	.	.
ENSSSCG00000026940	1.2764714803467232	1.3037028045584311	0.6286315639761914	0.29965074253521373	0.636383527798874	0.5147430056185064	CASP10	protein_coding	chr15:104858101-104894921:+	gi|239504558|ref|NP_001155112.1|	2692	0.0	caspase-10 [Sus scrofa]	gi|239504557|ref|NM_001161640.1|	2127	0.0	Sus scrofa caspase 10, apoptosis-related cysteine peptidase (CASP10), mRNA	Q92851	629	0.0	Caspase-10	.	.	.	.	pfam00656	Peptidase_C14	Caspase domain.	GO:0006915|apoptotic process;GO:0097190|apoptotic signaling pathway;GO:0007166|cell surface receptor signaling pathway;GO:0008625|extrinsic apoptotic signaling pathway via death domain receptors;GO:0030225|macrophage differentiation;GO:0043123|positive regulation of I-kappaB kinase/NF-kappaB signaling;GO:0042981|regulation of apoptotic process;	GO:0031265|CD95 death-inducing signaling complex;GO:0005829|cytosol;GO:0097342|ripoptosome;	GO:0004197|cysteine-type endopeptidase activity;GO:0097199|cysteine-type endopeptidase activity involved in apoptotic signaling pathway;GO:0035877|death effector domain binding;GO:0031625|ubiquitin protein ligase binding;	K04400	CASP10; caspase 10 [EC:3.4.22.63]
ENSSSCG00000029059	29.291361122943943	29.26832405745287	26.948979713251273	28.915656155891913	32.13714413333922	25.359307144868552	SSRP1	protein_coding	chr2:13619449-13630026:+	gi|335281869|ref|XP_003353912.1|	3021	0.0	PREDICTED: FACT complex subunit SSRP1 [Sus scrofa]	gi|927101936|ref|XM_003353864.3|	2801	0.0	PREDICTED: Sus scrofa structure specific recognition protein 1 (SSRP1), mRNA	Q08945	1143	0.0	FACT complex subunit SSRP1	SPBC609.05	320	2e-95	COG5165	pfam03531	SSrecog	Structure-specific recognition protein (SSRP1). SSRP1 has been implicated in transcriptional initiation and elongation and in DNA replication and repair. This domain belongs to the Pleckstrin homology fold superfamily.	GO:0006281|DNA repair;GO:0006260|DNA replication;GO:1901796|regulation of signal transduction by p53 class mediator;GO:0006355|regulation of transcription, DNA-templated;GO:0006368|transcription elongation from RNA polymerase II promoter;GO:0006366|transcription from RNA polymerase II promoter;	GO:0005694|chromosome;GO:0005737|cytoplasm;GO:0005730|nucleolus;GO:0005654|nucleoplasm;GO:0005634|nucleus;	GO:0003682|chromatin binding;GO:0003677|DNA binding;GO:0044822|poly(A) RNA binding;	K09272	SSRP1; structure-specific recognition protein 1
ENSSSCG00000026947	1.6000624556209437	0.9891192591723816	1.2729107223061884	0.8845091774788129	1.4660606506617775	1.2592441844065656	GMPR2	protein_coding	chr7:75056745-75070084:-	gi|472365072|ref|XP_004402094.1|	1922	0.0	PREDICTED: GMP reductase 2 isoform X1 [Odobenus rosmarus divergens]	gi|927160238|ref|XM_001928014.4|	1672	0.0	PREDICTED: Sus scrofa guanosine monophosphate reductase 2 (GMPR2), transcript variant X3, mRNA	Q32L93	607	0.0	GMP reductase 2	ZguaC	510	8e-165	COG0516	pfam00478	IMPDH	IMP dehydrogenase / GMP reductase domain. This family is involved in biosynthesis of guanosine nucleotide. Members of this family contain a TIM barrel structure. In the inosine monophosphate dehydrogenases 2 CBS domains pfam00571 are inserted in the TIM barrel. This family is a member of the common phosphate binding site TIM barrel family.	GO:0046037|GMP metabolic process;GO:0006144|purine nucleobase metabolic process;GO:0015951|purine ribonucleotide interconversion;	GO:0005737|cytoplasm;GO:1902560|GMP reductase complex;	GO:0003920|GMP reductase activity;GO:0046872|metal ion binding;	K00364	E1.7.1.7, guaC; GMP reductase [EC:1.7.1.7]
ENSSSCG00000026945	34.06072767229899	64.7171135969155	53.485803997260724	28.609435338939136	33.832238155561434	30.13515494553105	LRRC2	protein_coding	chr13:29477792-29524179:-	gi|190360677|ref|NP_001121956.1|	1818	0.0	leucine-rich repeat-containing protein 2 [Sus scrofa]	gi|41688294|dbj|AP006185.1|	2031	0.0	Sus scrofa CC chemokine receptor genes (CCR2, CCR5, CCRL2, LTF, TMEM7, LRRC2), complete cds, clone: 0475A03	Q9BYS8	672	0.0	Leucine-rich repeat-containing protein 2	MA2301_1	95.1	4e-20	COG4886	pfam13855	LRR_8	Leucine rich repeat.	GO:0097009|energy homeostasis;GO:0006112|energy reserve metabolic process;GO:0007631|feeding behavior;GO:0030819|positive regulation of cAMP biosynthetic process;GO:0034394|protein localization to cell surface;	GO:0005783|endoplasmic reticulum;GO:0005789|endoplasmic reticulum membrane;GO:0016021|integral component of membrane;GO:0005886|plasma membrane;	GO:0031780|corticotropin hormone receptor binding;GO:0070996|type 1 melanocortin receptor binding;GO:0031781|type 3 melanocortin receptor binding;GO:0031782|type 4 melanocortin receptor binding;GO:0031783|type 5 melanocortin receptor binding;	.	.
ENSSSCG00000028585	4.390923801172073	5.337806414004847	4.315813374736442	3.0661084963275678	4.491105034779914	4.155516078584493	CBLL1	protein_coding	chr9:107455186-107475390:+	gi|671021869|ref|XP_008701743.1|	1770	0.0	PREDICTED: E3 ubiquitin-protein ligase Hakai isoform X1 [Ursus maritimus]	gi|371918062|dbj|AK395730.1|	1976	0.0	Sus scrofa mRNA, clone: OVRT10054H07, expressed in ovary	Q75N03	634	0.0	E3 ubiquitin-protein ligase Hakai	.	.	.	.	pfam13923	zf-C3HC4_2	Zinc finger, C3HC4 type (RING finger).	GO:0007162|negative regulation of cell adhesion;GO:0030335|positive regulation of cell migration;GO:0045807|positive regulation of endocytosis;GO:0016567|protein ubiquitination;GO:0030155|regulation of cell adhesion;GO:0016337|single organismal cell-cell adhesion;	GO:0016607|nuclear speck;GO:0000151|ubiquitin ligase complex;	GO:0016874|ligase activity;GO:0003676|nucleic acid binding;GO:0061630|ubiquitin protein ligase activity;GO:0004842|ubiquitin-protein transferase activity;GO:0008270|zinc ion binding;	K15685	CBLL1; E3 ubiquitin-protein ligase Hakai [EC:2.3.2.27]
ENSSSCG00000022265	2.015417936371685	1.922991477603018	1.2773202330544438	0.9341315213370527	1.429453458533482	1.3800079054247099	C19orf25	protein_coding	chr2:76998977-77003327:+	gi|335282293|ref|XP_003354026.1|	601	3e-71	PREDICTED: UPF0449 protein C19orf25 homolog [Sus scrofa]	gi|927104757|ref|XM_003353978.3|	1879	0.0	PREDICTED: Sus scrofa chromosome 2 open reading frame, human C19orf25 (C2H19orf25), mRNA	Q1LZF3	176	2e-50	UPF0449 protein C19orf25 homolog	.	.	.	.	pfam15136	UPF0449	Uncharacterized protein family UPF0449. This family of proteins is functionally uncharacterized. This family of proteins is found in eukaryotes. There is a conserved LPTRP sequence motif.	GO:0007156|homophilic cell adhesion via plasma membrane adhesion molecules;	GO:0016021|integral component of membrane;GO:0005886|plasma membrane;	GO:0005509|calcium ion binding;GO:0001618|virus receptor activity;	.	.
ENSSSCG00000022264	0.0	0.13976685183957568	0.0	0.0	0.0	0.0	ENSSSCG00000022264	protein_coding	chr9:105831539-105838811:+	gi|671021915|ref|XP_008701766.1|	804	3e-96	PREDICTED: cadherin-related family member 3 [Ursus maritimus]	gi|288782478|dbj|AK350950.1|	368	0.0	Sus scrofa mRNA, clone:TCH010063H02, expressed in trachea	Q6ZTQ4	227	3e-66	Cadherin-related family member 3	.	.	.	.	pfam03116	NQR2_RnfD_RnfE	NQR2, RnfD, RnfE family. This family of bacterial proteins includes a sodium-translocating NADH-ubiquinone oxidoreductase (i.e. a respiration linked sodium pump). In Vibrio cholerae, it negatively regulates the expression of virulence factors through inhibiting (by an unknown mechanism) the transcription of the transcriptional activator ToxT. The family also includes proteins involved in nitrogen…	GO:0007156|homophilic cell adhesion via plasma membrane adhesion molecules;	GO:0016021|integral component of membrane;GO:0005886|plasma membrane;	GO:0005509|calcium ion binding;GO:0001618|virus receptor activity;	K16503	CDHR3, CDH28; cadherin-related family member 3
ENSSSCG00000028905	2.2176526044453793	2.2706060036752342	2.2062376679547295	1.4973375510876832	1.9030720104342216	1.3200936505638914	TNIK	protein_coding	chr13:109643895-110052259:-	gi|752408579|ref|XP_011225308.1|	5905	0.0	PREDICTED: TRAF2 and NCK-interacting protein kinase isoform X1 [Ailuropoda melanoleuca]	gi|953879825|ref|XM_014732750.1|	5521	0.0	PREDICTED: Equus caballus TRAF2 and NCK interacting kinase (TNIK), transcript variant X2, mRNA	P83510	695	0.0	Traf2 and NCK-interacting protein kinase	.	.	.	.	pfam00069	Pkinase	Protein kinase domain.	GO:0031532|actin cytoskeleton reorganization;GO:0007256|activation of JNKK activity;GO:0007010|cytoskeleton organization;GO:0035556|intracellular signal transduction;GO:0030033|microvillus assembly;GO:0002230|positive regulation of defense response to virus by host;GO:0001934|positive regulation of protein phosphorylation;GO:0046777|protein autophosphorylation;GO:0072659|protein localization to p…	GO:0016324|apical plasma membrane;GO:0005737|cytoplasm;GO:0005856|cytoskeleton;GO:0070062|extracellular exosome;GO:0005654|nucleoplasm;GO:0005634|nucleus;GO:0048471|perinuclear region of cytoplasm;GO:0055037|recycling endosome;	GO:0005524|ATP binding;GO:0004672|protein kinase activity;GO:0004674|protein serine/threonine kinase activity;GO:0004702|receptor signaling protein serine/threonine kinase activity;	K08840	TNIK; TRAF2 and NCK interacting kinase [EC:2.7.11.1]
ENSSSCG00000028908	5.653646855179083	5.135253994555195	4.117038692531251	3.557368755967582	5.219752457061244	5.518036313691693	DYNLT3	protein_coding	chrX:33711492-33724581:-	gi|311276121|ref|XP_003135056.1|	624	5e-73	PREDICTED: dynein light chain Tctex-type 3 [Sus scrofa]	gi|253947468|emb|CU207398.8|	2322	0.0	Pig DNA sequence from clone CH242-388N8 on chromosome X, complete sequence	Q8SPS9	241	5e-73	Dynein light chain Tctex-type 3	.	.	.	.	pfam03645	Tctex-1	Tctex-1 family. Tctex-1 is a dynein light chain. It has been shown that Tctex-1 can bind to the cytoplasmic tail of rhodopsin. C-terminal rhodopsin mutations responsible for retinitis pigmentosa inhibit this interaction.	GO:0051301|cell division;GO:0007067|mitotic nuclear division;GO:0007346|regulation of mitotic cell cycle;GO:0006810|transport;	GO:0000777|condensed chromosome kinetochore;GO:0005737|cytoplasm;GO:0005868|cytoplasmic dynein complex;GO:0005874|microtubule;GO:0005634|nucleus;	GO:0003774|motor activity;	K10420	DYNLT; dynein light chain Tctex-type 1
[truncated: 16,979 more rows]
